# Supplementary material
Source: PubMed Central journal article supplement (PMC4474159)
Supplement: NIHMS688723-supplement-10549_2015_3401_MOESM1_ESM.pdf [file NIHMS688723-supplement-10549_2015_3401_MOESM1_ESM.pdf]

Body Mass Index Associated with Genome-Wide Methylation in Breast Tissue. *Breast Cancer Research and Treatment*. Hair BY, Xu Z, Kirk E, Harlid S, Sandhu R, Robinson WR, Wu MC, Olshan AF, Conway K, Taylor JA, Troester MA. Corresponding author affiliation: University of North Carolina at Chapel Hill. Corresponding author email: bhair@email.unc.edu

Supplemental Table 1. 2,573 BMI-Associated Methylation Sites in the Normal Breast Study, adjusting for age, race, and alcohol use

| Probe      | CHR | MAPINFO   | CPG Location* | Gene         | Coefficient | p-value  | q-value  |
|------------|-----|-----------|---------------|--------------|-------------|----------|----------|
| cg01044662 | 2   | 75938360  | S_Shore       | GCFC2        | 64.0034946  | 1.58E-08 | 0.00444  |
| cg05612654 | 6   | 2375895   | Other         | LOC100508120 | -93.369219  | 5.19E-08 | 0.005435 |
| cg12924510 | 18  | 514363    | N_Shore       | NA           | -78.006878  | 5.81E-08 | 0.005435 |
| cg15028995 | 19  | 46628119  | Other         | IGFL3        | -124.52624  | 1.88E-07 | 0.012225 |
| cg02609279 | 2   | 182325952 | S_Shelf       | ITGA4        | -54.323292  | 3.22E-07 | 0.012225 |
| cg14724298 | 4   | 54424764  | Other         | LNX1         | -44.936848  | 3.44E-07 | 0.012225 |
| cg20810975 | 17  | 42467199  | S_Shelf       | ITGA2B       | -81.660531  | 3.48E-07 | 0.012225 |
| cg22727965 | 7   | 25898770  | Island        | NA           | -74.989062  | 3.49E-07 | 0.012225 |
| cg16551670 | 5   | 106637856 | Other         | NA           | -41.994855  | 4.30E-07 | 0.012226 |
| cg22216196 | 19  | 15564105  | Island        | WIZ          | 52.1995459  | 4.54E-07 | 0.012226 |
| cg22573003 | X   | 15402648  | Other         | FIGF         | 60.2694175  | 5.15E-07 | 0.012226 |
| cg18445108 | 17  | 5138259   | Other         | SCIMP        | -78.846477  | 5.23E-07 | 0.012226 |
| cg26050975 | 5   | 179231109 | N_Shore       | MGAT4B       | -85.677027  | 5.73E-07 | 0.01236  |
| cg13673563 | 14  | 21738473  | S_Shore       | HNRNPC       | -75.192662  | 7.41E-07 | 0.014051 |
| cg09667606 | 6   | 158507930 | Island        | SYNJ2        | -45.78714   | 7.70E-07 | 0.014051 |
| cg13674705 | 1   | 184829177 | Other         | FAM129A      | -101.27697  | 8.33E-07 | 0.014051 |
| cg10767045 | 10  | 89264128  | N_Shore       | MINPP1       | 41.0743103  | 8.51E-07 | 0.014051 |
| cg26972389 | 5   | 169407753 | Other         | FAM196B      | 70.9031872  | 1.04E-06 | 0.016205 |
| cg26894297 | 1   | 23754550  | S_Shelf       | TCEA3        | -130.5615   | 1.29E-06 | 0.017538 |
| cg22190361 | 2   | 174886880 | N_Shelf       | NA           | -33.763119  | 1.32E-06 | 0.017538 |
| cg23252243 | 2   | 26987820  | S_Shore       | SLC35F6      | 46.2354944  | 1.45E-06 | 0.017538 |
| cg02382221 | 4   | 86682649  | Other         | ARHGAP24     | -119.14408  | 1.50E-06 | 0.017538 |
| cg14575356 | 6   | 130013903 | Other         | ARHGAP18     | -55.904756  | 1.51E-06 | 0.017538 |
| cg01440934 | 1   | 47051752  | Other         | MKNK1        | -94.276707  | 1.61E-06 | 0.017538 |
| cg03089651 | 1   | 161039695 | Other         | ARHGAP30     | -59.146057  | 1.79E-06 | 0.017538 |
| cg08468577 | 11  | 2973342   | Other         | NAP1L4       | -81.895471  | 1.81E-06 | 0.017538 |
| cg00667525 | 19  | 18699118  | N_Shore       | C19orf60     | 49.1276328  | 1.89E-06 | 0.017538 |
| cg22595920 | 1   | 9716050   | S_Shelf       | C1orf200     | -82.480854  | 1.92E-06 | 0.017538 |
| cg20487608 | 6   | 15288126  | Other         | JARID2       | -68.646398  | 1.99E-06 | 0.017538 |
| cg23159337 | 3   | 193272778 | Other         | ATP13A4      | 77.9541776  | 2.10E-06 | 0.017538 |
| cg24165086 | 11  | 64705980  | Other         | GPHA2        | -117.41237  | 2.27E-06 | 0.017538 |
| cg04090347 | 21  | 44061597  | Other         | NA           | 41.6992182  | 2.28E-06 | 0.017538 |
| cg16298927 | 6   | 170191076 | S_Shore       | LINC00574    | 29.7185154  | 2.30E-06 | 0.017538 |
| cg05287480 | 7   | 27176127  | N_Shelf       | HOXA-AS3     | 64.3666325  | 2.35E-06 | 0.017538 |
| cg03874653 | 3   | 123380206 | Other         | MYLK         | 38.7944553  | 2.38E-06 | 0.017538 |
| cg09250458 | 16  | 1139916   | Island        | C1QTNF8      | 47.262956   | 2.43E-06 | 0.017538 |

Supplemental Table 1. 2,573 BMI-Associated Methylation Sites in the Normal Breast Study, adjusting for age, race, and alcohol use

| Probe      | CHR | MAPINFO   | CPG Location* | Gene     | Coefficient | p-value  | q-value  |
|------------|-----|-----------|---------------|----------|-------------|----------|----------|
| cg17969683 | 8   | 24151514  | Other         | ADAM28   | -50.04336   | 2.58E-06 | 0.017538 |
| cg24546683 | 1   | 242097870 | N_Shelf       | NA       | 31.8228613  | 2.66E-06 | 0.017538 |
| cg21218183 | 1   | 92760687  | Other         | RPAP2    | -31.108025  | 2.66E-06 | 0.017538 |
| cg01652190 | 22  | 50026171  | Island        | C22orf34 | 33.6878786  | 2.78E-06 | 0.017538 |
| cg06107293 | 15  | 22915986  | Other         | CYFIP1   | -50.488668  | 2.80E-06 | 0.017538 |
| cg19502671 | 13  | 114129004 | Other         | DCUN1D2  | -62.976812  | 2.85E-06 | 0.017538 |
| cg08486903 | 7   | 98739496  | N_Shore       | SMURF1   | 69.4268587  | 2.90E-06 | 0.017538 |
| cg24833674 | 1   | 166914191 | N_Shelf       | ILDR2    | -61.994912  | 2.95E-06 | 0.017538 |
| cg06110286 | 8   | 145728587 | N_Shore       | GPT      | 70.90898    | 3.01E-06 | 0.017538 |
| cg03198066 | 2   | 159311068 | N_Shelf       | CCDC148  | -64.64454   | 3.04E-06 | 0.017538 |
| cg16515974 | 6   | 31695064  | N_Shore       | DDAH2    | -96.195998  | 3.13E-06 | 0.017538 |
| cg06034527 | 15  | 96912955  | S_Shore       | NA       | -43.753633  | 3.25E-06 | 0.017538 |
| cg12405520 | 11  | 126030310 | Other         | NA       | 50.3039702  | 3.26E-06 | 0.017538 |
| cg18857467 | 1   | 32787489  | Other         | HDAC1    | -36.964448  | 3.28E-06 | 0.017538 |
| cg00027232 | 2   | 85547231  | Other         | TGOLN2   | -80.305405  | 3.38E-06 | 0.017538 |
| cg00407944 | 9   | 139424152 | N_Shore       | NOTCH1   | -53.819224  | 3.38E-06 | 0.017538 |
| cg24640390 | 10  | 71336969  | N_Shore       | NEUROG3  | 55.6760132  | 3.48E-06 | 0.017538 |
| cg11967765 | 7   | 2774195   | N_Shore       | GNA12    | -57.053738  | 3.51E-06 | 0.017538 |
| cg03458695 | 10  | 78163703  | Other         | C10orf11 | -87.013284  | 3.52E-06 | 0.017538 |
| cg19228647 | 6   | 6901002   | Other         | NA       | -36.73929   | 3.54E-06 | 0.017538 |
| cg21500909 | 19  | 41870640  | S_Shore       | B9D2     | -47.408778  | 3.56E-06 | 0.017538 |
| cg02737379 | 3   | 119379530 | Other         | POPDC2   | 29.9750334  | 3.81E-06 | 0.017907 |
| cg01825818 | 2   | 131554018 | N_Shore       | NA       | -71.14647   | 3.83E-06 | 0.017907 |
| cg17852032 | 6   | 158066811 | Other         | ZDHHC14  | -62.906646  | 3.83E-06 | 0.017907 |
| cg17658002 | 19  | 11689997  | S_Shore       | ACP5     | -59.874456  | 4.04E-06 | 0.017953 |
| cg21988461 | 4   | 88008667  | Other         | AFF1     | -62.161831  | 4.19E-06 | 0.017953 |
| cg08840913 | 2   | 24139933  | Island        | ATAD2B   | -61.768175  | 4.21E-06 | 0.017953 |
| cg03814063 | 22  | 50025915  | Other         | C22orf34 | 49.464325   | 4.21E-06 | 0.017953 |
| cg12967050 | 19  | 36233297  | S_Shore       | IGFLR1   | -85.436081  | 4.38E-06 | 0.017953 |
| cg05587400 | 10  | 5817943   | Other         | GDI2     | -53.473271  | 4.42E-06 | 0.017953 |
| cg13071208 | 8   | 145686887 | N_Shore       | CYHR1    | 44.6918908  | 4.44E-06 | 0.017953 |
| cg00451054 | 8   | 77913321  | S_Shore       | PEX2     | 50.803086   | 4.46E-06 | 0.017953 |
| cg26272443 | 19  | 41083341  | Island        | SHKBP1   | 110.187569  | 4.49E-06 | 0.017953 |
| cg10499974 | 3   | 46244099  | Other         | CCR1     | -59.499221  | 4.57E-06 | 0.017953 |
| cg08202836 | 3   | 196373751 | Other         | NRROS    | -37.858856  | 4.57E-06 | 0.017953 |
| cg15694146 | 1   | 27823372  | Other         | NA       | 54.9282325  | 4.67E-06 | 0.017953 |
| cg00045118 | 8   | 93076177  | Other         | RUNX1T1  | 50.7745502  | 4.70E-06 | 0.017953 |
| cg24527008 | 5   | 177870233 | Other         | COL23A1  | -52.599884  | 4.73E-06 | 0.017953 |
| cg27621997 | 11  | 60608634  | N_Shore       | CCDC86   | 31.8939175  | 4.87E-06 | 0.018045 |
| cg23357708 | 19  | 8580509   | S_Shore       | ZNF414   | -71.13958   | 4.89E-06 | 0.018045 |
| cg27571769 | 4   | 185704063 | Other         | ACSL1    | -42.302406  | 5.07E-06 | 0.018431 |

Supplemental Table 1. 2,573 BMI-Associated Methylation Sites in the Normal Breast Study, adjusting for age, race, and alcohol use

| Probe      | CHR | MAPINFO   | CPG Location* | Gene         | Coefficient | p-value  | q-value  |
|------------|-----|-----------|---------------|--------------|-------------|----------|----------|
| cg14007090 | 20  | 60915009  | S_Shelf       | LAMA5        | -83.771114  | 5.13E-06 | 0.018431 |
| cg22717593 | 19  | 45647012  | N_Shore       | PPP1R37      | -91.360816  | 5.23E-06 | 0.018431 |
| cg20609803 | 1   | 161184305 | Other         | FCER1G       | -69.042377  | 5.26E-06 | 0.018431 |
| cg25346117 | 1   | 116923256 | Other         | ATP1A1       | -95.435554  | 5.35E-06 | 0.018431 |
| cg01052699 | 4   | 171030995 | Other         | NA           | 51.2089926  | 5.39E-06 | 0.018431 |
| cg24637417 | 12  | 51636921  | S_Shelf       | DAZAP2       | -73.678909  | 5.53E-06 | 0.018474 |
| cg04188920 | 10  | 3138534   | Other         | PFKP         | -50.540612  | 5.60E-06 | 0.018474 |
| cg21241317 | 6   | 32122736  | S_Shore       | LOC100507547 | 146.291662  | 5.69E-06 | 0.018474 |
| cg06427816 | 17  | 1090326   | Other         | ABR          | 36.6003536  | 5.70E-06 | 0.018474 |
| cg00753676 | 4   | 38662991  | N_Shore       | KLF3         | -70.517681  | 5.77E-06 | 0.018474 |
| cg18993949 | 4   | 15481269  | Other         | CC2D2A       | 36.3140372  | 5.79E-06 | 0.018474 |
| cg13067714 | 14  | 69091453  | N_Shelf       | NA           | -92.848157  | 5.87E-06 | 0.018494 |
| cg26787020 | 1   | 174968089 | N_Shore       | CACYBP       | 41.2347276  | 6.05E-06 | 0.01887  |
| cg24870729 | 1   | 62102363  | Other         | NA           | -51.879934  | 6.17E-06 | 0.019017 |
| cg14841540 | 1   | 90427858  | Other         | NA           | -35.796795  | 6.27E-06 | 0.019091 |
| cg01033299 | 12  | 53601015  | Other         | ITGB7        | -46.045391  | 6.33E-06 | 0.019091 |
| cg20107346 | 12  | 88803163  | Other         | NA           | -112.21322  | 6.51E-06 | 0.019296 |
| cg06928741 | 6   | 31691430  | Island        | C6orf25      | -73.930012  | 6.53E-06 | 0.019296 |
| cg24013213 | 13  | 51640142  | Other         | GUCY1B2      | -42.257585  | 6.91E-06 | 0.019668 |
| cg18418051 | 5   | 32734970  | Other         | NPR3         | -57.904657  | 6.96E-06 | 0.019668 |
| cg10145584 | 11  | 117860269 | Other         | IL10RA       | -75.477163  | 7.00E-06 | 0.019668 |
| cg10021122 | 1   | 117610620 | S_Shelf       | TTF2         | 81.6466099  | 7.00E-06 | 0.019668 |
| cg19971655 | 1   | 55464927  | Island        | BSND         | -74.218431  | 7.08E-06 | 0.019668 |
| cg13580767 | 12  | 50135122  | S_Shore       | TMBIM6       | 779.885951  | 7.08E-06 | 0.019668 |
| cg08526959 | 2   | 25149334  | Other         | NA           | -92.24382   | 7.28E-06 | 0.019848 |
| cg11751101 | 12  | 7244660   | Other         | C1R          | 44.7041723  | 7.30E-06 | 0.019848 |
| cg01893100 | 3   | 167799377 | Other         | GOLIM4       | -38.402507  | 7.58E-06 | 0.019848 |
| cg09167779 | 5   | 112566614 | Other         | MCC          | 38.4449598  | 7.64E-06 | 0.019848 |
| cg01816936 | 12  | 123518888 | Other         | PITPNM2      | -56.403998  | 7.65E-06 | 0.019848 |
| cg25992874 | 7   | 142997642 | Other         | CASP2        | -89.845303  | 7.69E-06 | 0.019848 |
| cg15998505 | 1   | 153479701 | Other         | NA           | 76.7951985  | 7.73E-06 | 0.019848 |
| cg01354046 | 5   | 171057339 | Island        | NA           | 74.7524757  | 7.74E-06 | 0.019848 |
| cg21870038 | 17  | 33390736  | Other         | RFFL         | -30.380216  | 7.80E-06 | 0.019848 |
| cg02455383 | 22  | 27014116  | Other         | CRYBB1       | -67.284908  | 7.93E-06 | 0.019848 |
| cg26504421 | 17  | 71339361  | Other         | SDK2         | 64.5472312  | 8.07E-06 | 0.019848 |
| cg04147906 | 17  | 26373775  | Other         | NLK          | -67.413275  | 8.08E-06 | 0.019848 |
| cg06261052 | 10  | 13545875  | Other         | BEND7        | -82.640867  | 8.15E-06 | 0.019848 |
| cg24428218 | 10  | 126303795 | Island        | NA           | -29.732186  | 8.20E-06 | 0.019848 |
| cg16077055 | 2   | 106428750 | Other         | NCK2         | 29.2598325  | 8.26E-06 | 0.019848 |
| cg10274453 | 13  | 43378116  | Other         | NA           | -34.566824  | 8.34E-06 | 0.019848 |
| cg08254266 | 8   | 36641818  | Other         | KCNU1        | -122.51745  | 8.35E-06 | 0.019848 |

Supplemental Table 1. 2,573 BMI-Associated Methylation Sites in the Normal Breast Study, adjusting for age, race, and alcohol use

| Probe      | CHR | MAPINFO   | CPG Location* | Gene     | Coefficient      | p-value  | q-value  |
|------------|-----|-----------|---------------|----------|------------------|----------|----------|
| cg00309582 | 20  | 55841925  | S_Shore       | BMP7     | 450.873665       | 8.43E-06 | 0.019869 |
| cg26923863 | 4   | 1221838   | Island        | CTBP1    | -53.088892       | 8.52E-06 | 0.019882 |
| cg00057966 | 17  | 56408694  | Other         | MIR142   | -50.808209       | 8.62E-06 | 0.019882 |
| cg02492873 | 2   | 25193821  | N_Shore       | DNAJC27  | 41.5017792       | 8.64E-06 | 0.019882 |
| cg05949640 | 4   | 2627057   | Other         | FAM193A  | 30.9247584       | 8.90E-06 | 0.020157 |
| cg07788061 | 19  | 13207239  | N_Shore       | NFIX     | -92.557757       | 8.92E-06 | 0.020157 |
| cg23962746 | 1   | 209105888 | Other         | NA       | 69.9269978       | 8.98E-06 | 0.020157 |
| cg00201196 | 16  | 8738469   | Other         | METTL22  | -80.550935       | 9.07E-06 | 0.020188 |
| cg10227830 | 4   | 144332828 | Other         | GAB1     | 49.1899414       | 9.19E-06 | 0.020312 |
| cg17207512 | 6   | 11382553  | Other         | NEDD9    | -54.543891       | 9.27E-06 | 0.020329 |
| cg10666916 | 6   | 33872206  | S_Shore       | NA       | -76.610681       | 9.44E-06 | 0.020383 |
| cg08813888 | 2   | 662396    | Other         | NA       | -53.782802       | 9.44E-06 | 0.020383 |
| cg26732720 | 11  | 64392533  | Other         | NRXN2    | -64.501175       | 9.53E-06 | 0.020413 |
| cg11494437 | 3   | 15678564  | Other         | BTD      | -50.152869       | 9.66E-06 | 0.020431 |
| cg18637901 | 4   | 3247372   | N_Shelf       | MSANTD1  | -120.49988       | 9.68E-06 | 0.020431 |
| cg10324998 | 1   | 92338262  | Other         | TGFBR3   | 66.5351905       | 9.87E-06 | 0.02053  |
| cg16250868 | 7   | 3710628   | Other         | SDK1     | -23.001456       | 9.88E-06 | 0.02053  |
| cg16721359 | 8   | 98610787  | Other         | NA       | -69.946429       | 1.04E-05 | 0.021227 |
| cg11649821 | 1   | 1859438   | Island        | NA       | -60.17224        | 1.06E-05 | 0.021227 |
| cg25037841 | 22  | 20237341  | Other         | MIR1286  | 46.3919569       | 1.07E-05 | 0.021227 |
| cg03069267 | 9   | 134699490 | Island        | NA       | 53.3772566       | 1.08E-05 | 0.021227 |
| cg14855124 | 1   | 9180023   | Other         | GPR157   | -69.920941       | 1.08E-05 | 0.021227 |
| cg15818008 | 11  | 112126170 | Other         | C11orf34 | -41.754715       | 1.08E-05 | 0.021227 |
| cg02154345 | 12  | 115104983 | Island        | NA       | -55.221813       | 1.09E-05 | 0.021227 |
| cg23343486 | 17  | 75449911  | Other         |          | 9-Sep -67.785532 | 1.10E-05 | 0.021227 |
| cg14080050 | 9   | 33159025  | S_Shelf       | B4GALT1  | -48.710824       | 1.10E-05 | 0.021227 |
| cg24020157 | 10  | 43697521  | Other         | RASGEF1A | -60.512436       | 1.11E-05 | 0.021227 |
| cg18966495 | 6   | 22222737  | N_Shore       | NA       | 58.5478719       | 1.11E-05 | 0.021227 |
| cg18638581 | 2   | 75059602  | N_Shore       | HK2      | -47.736258       | 1.14E-05 | 0.021227 |
| cg14146966 | 2   | 61757674  | S_Shore       | XPO1     | 43.1685072       | 1.15E-05 | 0.021227 |
| cg08486269 | 6   | 154677972 | Other         | IPCEF1   | -42.267788       | 1.15E-05 | 0.021227 |
| cg03310874 | 7   | 4850260   | Other         | RADIL    | -50.328402       | 1.15E-05 | 0.021227 |
| cg02320083 | 5   | 171057072 | Island        | NA       | 651.734528       | 1.16E-05 | 0.021227 |
| cg17042715 | 13  | 75814730  | Other         | CTAGE11P | -141.20694       | 1.16E-05 | 0.021227 |
| cg26681847 | 11  | 120208749 | S_Shore       | ARHGEF12 | 63.3647848       | 1.17E-05 | 0.021227 |
| cg26274090 | 19  | 40195028  | Other         | LGALS14  | 44.2810322       | 1.18E-05 | 0.021227 |
| cg20382493 | 13  | 114829170 | Other         | RASA3    | 48.4909184       | 1.20E-05 | 0.021227 |
| cg02596994 | 12  | 122296950 | Other         | HPD      | 51.2022886       | 1.21E-05 | 0.021227 |
| cg03886558 | 12  | 57869490  | Island        | ARHGAP9  | 48.7204974       | 1.21E-05 | 0.021227 |
| cg04042106 | 11  | 65628736  | S_Shore       | MUS81    | 266.516448       | 1.22E-05 | 0.021227 |
| cg16323359 | 6   | 41913381  | S_Shelf       | CCND3    | -156.14715       | 1.22E-05 | 0.021227 |

Supplemental Table 1. 2,573 BMI-Associated Methylation Sites in the Normal Breast Study, adjusting for age, race, and alcohol use

| Probe      | CHR | MAPINFO   | CPG Location* | Gene         | Coefficient | p-value  | q-value  |
|------------|-----|-----------|---------------|--------------|-------------|----------|----------|
| cg24254842 | 1   | 42193353  | Other         | HIVEP3       | -31.170344  | 1.22E-05 | 0.021227 |
| cg23238058 | 6   | 7042879   | Other         | NA           | -40.606632  | 1.23E-05 | 0.021227 |
| cg06048102 | 13  | 51575027  | Other         | GUCY1B2      | 43.5306579  | 1.23E-05 | 0.021227 |
| cg17952939 | 1   | 9154250   | Other         | NA           | -69.618328  | 1.26E-05 | 0.021227 |
| cg02544658 | 21  | 44876604  | Island        | NA           | -51.237726  | 1.26E-05 | 0.021227 |
| cg01034993 | 15  | 68992751  | Island        | CORO2B       | -48.631729  | 1.26E-05 | 0.021227 |
| cg09568217 | 17  | 7311868   | Other         | NLGN2        | -60.580493  | 1.26E-05 | 0.021227 |
| cg01062269 | X   | 100603843 | Other         | TIMM8A       | -58.205938  | 1.27E-05 | 0.021227 |
| cg00471696 | 2   | 173955214 | Island        | ZAK          | 46.52697    | 1.27E-05 | 0.021227 |
| cg23595451 | 4   | 1035462   | Other         | NA           | 65.8281054  | 1.28E-05 | 0.021227 |
| cg08685085 | 12  | 57114435  | Other         | NACA         | -58.381062  | 1.29E-05 | 0.021227 |
| cg24226371 | 15  | 75945038  | Other         | SNX33        | 48.9571662  | 1.32E-05 | 0.021281 |
| cg22022821 | 11  | 102750873 | Other         | NA           | -70.702981  | 1.33E-05 | 0.021281 |
| cg07113653 | 6   | 13428657  | Other         | GFOD1        | -47.944234  | 1.33E-05 | 0.021281 |
| cg04079215 | 1   | 95095221  | Other         | NA           | -57.373387  | 1.33E-05 | 0.021281 |
| cg25789721 | 3   | 10370264  | S_Shore       | ATP2B2       | 64.0409197  | 1.34E-05 | 0.021281 |
| cg06955979 | 14  | 101162556 | Other         | NA           | 60.3515163  | 1.34E-05 | 0.021281 |
| cg00348762 | 16  | 56228114  | N_Shore       | DKFZP434H168 | 66.2180161  | 1.34E-05 | 0.021281 |
| cg27574973 | 7   | 78218446  | Other         | MAGI2        | -108.74207  | 1.35E-05 | 0.021307 |
| cg14225168 | 9   | 139403827 | N_Shore       | NOTCH1       | -56.890348  | 1.39E-05 | 0.021624 |
| cg09275408 | 10  | 44500491  | N_Shore       | NA           | -60.432294  | 1.40E-05 | 0.021624 |
| cg09120934 | 11  | 120187999 | Other         | POU2F3       | 56.5007194  | 1.41E-05 | 0.021624 |
| cg25337513 | 17  | 78800631  | Other         | RPTOR        | -69.140884  | 1.42E-05 | 0.021624 |
| cg09679746 | 16  | 61960656  | Other         | CDH8         | 68.8314197  | 1.42E-05 | 0.021624 |
| cg06150803 | 13  | 24144257  | S_Shore       | TNFRSF19     | 44.8183074  | 1.42E-05 | 0.021624 |
| cg07353685 | 1   | 153536278 | Other         | S100A2       | -63.032953  | 1.43E-05 | 0.021624 |
| cg03984209 | 3   | 55920018  | Other         | ERC2         | -37.581663  | 1.44E-05 | 0.021652 |
| cg02460419 | 12  | 124198876 | S_Shore       | ATP6V0A2     | -60.972739  | 1.44E-05 | 0.021672 |
| cg20120371 | 17  | 41956344  | Other         | MPP2         | 33.1665232  | 1.46E-05 | 0.021742 |
| cg18334681 | 6   | 132066129 | Other         | ENPP3        | -30.143781  | 1.47E-05 | 0.02175  |
| cg16496462 | 12  | 124854282 | N_Shelf       | NCOR2        | 41.6046367  | 1.47E-05 | 0.021774 |
| cg26918808 | 1   | 67950349  | Other         | NA           | 43.2497097  | 1.49E-05 | 0.021817 |
| cg11297046 | 19  | 49657000  | S_Shore       | HRC          | -57.805917  | 1.51E-05 | 0.02212  |
| cg01209566 | 8   | 125954151 | Other         | LINC00964    | 55.8745769  | 1.52E-05 | 0.022129 |
| cg20049422 | 15  | 26044289  | Other         | ATP10A       | -41.953423  | 1.54E-05 | 0.02223  |
| cg11010552 | 5   | 131338478 | Other         | ACSL6        | -94.10385   | 1.55E-05 | 0.022262 |
| cg27050111 | 16  | 8738240   | Other         | METTL22      | -51.381859  | 1.56E-05 | 0.022374 |
| cg05120113 | 3   | 33140160  | S_Shore       | GLB1         | -131.47278  | 1.57E-05 | 0.022374 |
| cg22480742 | 7   | 134576386 | Other         | CALD1        | 47.8626606  | 1.58E-05 | 0.022397 |
| cg11534596 | 1   | 17574720  | Other         | PADI3        | -60.860067  | 1.62E-05 | 0.022743 |
| cg21005416 | 1   | 21606617  | Other         | ECE1         | -31.210444  | 1.62E-05 | 0.022743 |

Supplemental Table 1. 2,573 BMI-Associated Methylation Sites in the Normal Breast Study, adjusting for age, race, and alcohol use

| Probe      | CHR | MAPINFO   | CPG Location* | Gene         | Coefficient | p-value  | q-value  |
|------------|-----|-----------|---------------|--------------|-------------|----------|----------|
| cg19323703 | 2   | 46498015  | Other         | NA           | -73.196626  | 1.64E-05 | 0.022862 |
| cg12105382 | 12  | 4390091   | Other         | CCND2        | 49.8077289  | 1.66E-05 | 0.023001 |
| cg17626734 | 6   | 130182551 | Other         | TMEM244      | 28.7118912  | 1.67E-05 | 0.023001 |
| cg17920246 | 10  | 14116424  | Other         | FRMD4A       | 37.3134207  | 1.67E-05 | 0.023001 |
| cg19262637 | 1   | 240783328 | Other         | NA           | 33.9598136  | 1.70E-05 | 0.023251 |
| cg13549277 | 12  | 6659520   | S_Shore       | IFFO1        | -57.032104  | 1.73E-05 | 0.023421 |
| cg17210664 | 10  | 61297420  | Other         | NA           | 43.2598333  | 1.73E-05 | 0.023421 |
| cg16530881 | 17  | 38708399  | Other         | NA           | 37.0706872  | 1.74E-05 | 0.023421 |
| cg16903174 | 2   | 9468351   | Other         | ASAP2        | -44.572783  | 1.77E-05 | 0.023726 |
| cg10058766 | 1   | 12186079  | Other         | TNFRSF8      | -38.620051  | 1.78E-05 | 0.023726 |
| cg23854567 | 12  | 120694893 | Other         | PXN          | 43.2874908  | 1.79E-05 | 0.023781 |
| cg15757292 | 11  | 119994008 | Other         | TRIM29       | -61.912072  | 1.80E-05 | 0.023843 |
| cg02894226 | 20  | 3190561   | Island        | ITPA         | 425.193705  | 1.82E-05 | 0.023918 |
| cg13866093 | 6   | 28502727  | Other         | GPX5         | 39.3919089  | 1.83E-05 | 0.023993 |
| cg12006375 | 13  | 51640315  | Other         | GUCY1B2      | -70.63086   | 1.86E-05 | 0.024204 |
| cg02609337 | 8   | 134559320 | Other         | ST3GAL1      | -45.874465  | 1.86E-05 | 0.024204 |
| cg16593865 | 8   | 126082720 | Other         | KIAA0196     | 45.0650192  | 1.89E-05 | 0.024342 |
| cg25724895 | 20  | 58630390  | Other         | C2orf197     | -52.308438  | 1.90E-05 | 0.024342 |
| cg22485921 | 5   | 131557716 | Other         | P4HA2        | 60.6522356  | 1.91E-05 | 0.024342 |
| cg02365539 | 7   | 2136919   | Other         | MAD1L1       | -70.647526  | 1.92E-05 | 0.024342 |
| cg06688763 | 7   | 92238207  | Other         | CDK6         | 51.1418202  | 1.92E-05 | 0.024342 |
| cg15847685 | 4   | 62129666  | Other         | NA           | -32.907125  | 1.94E-05 | 0.024342 |
| cg11547696 | 8   | 142288508 | Other         | NA           | -99.971515  | 1.95E-05 | 0.024342 |
| cg15408360 | 14  | 102432104 | Other         | DYNC1H1      | 39.3429507  | 1.95E-05 | 0.024342 |
| cg07892449 | 17  | 4835627   | S_Shore       | GP1BA        | -53.999958  | 1.95E-05 | 0.024342 |
| cg01048752 | 8   | 10001523  | Other         | MSRA         | -110.90683  | 2.01E-05 | 0.024932 |
| cg02338840 | 2   | 207931932 | Other         | NA           | -86.006542  | 2.04E-05 | 0.024944 |
| cg22718308 | 15  | 42308160  | Other         | PLA2G4E      | -176.47851  | 2.08E-05 | 0.024944 |
| cg06682445 | 7   | 43915791  | Other         | URGCP-MRPS24 | -64.908437  | 2.08E-05 | 0.024944 |
| cg12656272 | 3   | 100328186 | Other         | GPR128       | -56.7966    | 2.09E-05 | 0.024944 |
| cg00423487 | 19  | 4455957   | N_Shore       | UBXN6        | 74.434293   | 2.10E-05 | 0.024944 |
| cg21459713 | 8   | 623688    | Island        | ERICH1       | -41.470695  | 2.10E-05 | 0.024944 |
| cg10576992 | 4   | 119662530 | Other         | SEC24D       | 35.5908334  | 2.11E-05 | 0.024944 |
| cg01456691 | 6   | 11382556  | Other         | NEDD9        | -67.843461  | 2.12E-05 | 0.024944 |
| cg11574092 | 2   | 241394528 | N_Shore       | MIR149       | -59.61566   | 2.13E-05 | 0.024944 |
| cg13688889 | 9   | 100608707 | N_Shore       | NA           | -44.289546  | 2.15E-05 | 0.024944 |
| cg24413778 | 13  | 110977981 | Other         | COL4A2       | -45.808253  | 2.15E-05 | 0.024944 |
| cg12332776 | 10  | 71336241  | N_Shore       | NEUROG3      | 65.135456   | 2.16E-05 | 0.024944 |
| cg20103124 | 13  | 31309625  | S_Shore       | ALOX5AP      | -65.521381  | 2.17E-05 | 0.024944 |
| cg17478749 | 6   | 31589365  | Other         | PRRC2A       | 132.895988  | 2.17E-05 | 0.024944 |
| cg00791321 | 2   | 239999938 | Other         | HDAC4        | 66.3706159  | 2.18E-05 | 0.024944 |

Supplemental Table 1. 2,573 BMI-Associated Methylation Sites in the Normal Breast Study, adjusting for age, race, and alcohol use

| Probe      | CHR | MAPINFO   | CPG Location* | Gene      | Coefficient | p-value  | q-value  |
|------------|-----|-----------|---------------|-----------|-------------|----------|----------|
| cg14162552 | 9   | 139744532 | Island        | PHPT1     | 50.2972097  | 2.18E-05 | 0.024944 |
| cg08329473 | 10  | 116133852 | Other         | AFAP1L2   | 63.3355536  | 2.19E-05 | 0.024944 |
| cg03919657 | 17  | 48502312  | N_Shore       | ACSF2     | -55.562997  | 2.20E-05 | 0.024944 |
| cg08643131 | 19  | 1356150   | S_Shore       | MUM1      | 72.3370265  | 2.20E-05 | 0.024944 |
| cg01374870 | 6   | 32905127  | Other         | HLA-DMB   | -47.687837  | 2.21E-05 | 0.024944 |
| cg26075966 | 7   | 44999021  | N_Shelf       | NA        | -29.615774  | 2.21E-05 | 0.024944 |
| cg09916174 | 7   | 134576049 | Other         | CALD1     | 41.0414108  | 2.22E-05 | 0.024944 |
| cg21188533 | 3   | 53700263  | Other         | CACNA1D   | -46.820368  | 2.23E-05 | 0.024944 |
| cg16982073 | 13  | 112507984 | Other         | NA        | 28.5922614  | 2.25E-05 | 0.024944 |
| cg00373763 | 13  | 50908713  | Other         | NA        | -82.250899  | 2.25E-05 | 0.024944 |
| cg13011604 | 3   | 46950416  | Other         | NA        | 53.0705097  | 2.25E-05 | 0.024944 |
| cg19960420 | 10  | 101282185 | N_Shore       | NA        | 36.0112928  | 2.26E-05 | 0.024944 |
| cg16119522 | 20  | 37433745  | N_Shore       | PPP1R16B  | -53.493943  | 2.26E-05 | 0.024944 |
| cg07035442 | 17  | 81028481  | Other         | NA        | -59.034818  | 2.28E-05 | 0.024973 |
| cg16377679 | 5   | 58388744  | Other         | PDE4D     | 34.8757271  | 2.29E-05 | 0.024973 |
| cg24598993 | 6   | 4923095   | Other         | CDYL      | -55.910679  | 2.29E-05 | 0.024973 |
| cg12196406 | 19  | 35629576  | N_Shelf       | FXYD1     | 55.2962631  | 2.30E-05 | 0.024973 |
| cg08892455 | 17  | 1231715   | Other         | NA        | -55.854138  | 2.31E-05 | 0.024973 |
| cg00017461 | 22  | 30663316  | S_Shelf       | OSM       | -57.558528  | 2.31E-05 | 0.024973 |
| cg19585100 | 14  | 73703023  | N_Shore       | PAPLN     | -61.989224  | 2.37E-05 | 0.025517 |
| cg02475834 | 10  | 13628849  | Island        | PRPF18    | 678.125266  | 2.39E-05 | 0.025638 |
| cg02185666 | 2   | 206549667 | Island        | NRP2      | -29.181574  | 2.42E-05 | 0.025796 |
| cg00045607 | 1   | 161039690 | Other         | ARHGAP30  | -65.557866  | 2.43E-05 | 0.025829 |
| cg06943912 | 19  | 10715612  | S_Shelf       | SLC44A2   | -43.790796  | 2.44E-05 | 0.025876 |
| cg23093580 | 1   | 39491322  | Other         | NDUFS5    | 52.9268677  | 2.46E-05 | 0.025876 |
| cg23301925 | 14  | 91294322  | Other         | NA        | 61.2893046  | 2.46E-05 | 0.025876 |
| cg13423554 | 1   | 42317463  | Other         | HIVEP3    | -31.00624   | 2.48E-05 | 0.02592  |
| cg14431165 | 6   | 44160222  | Other         | NA        | -48.287903  | 2.52E-05 | 0.026291 |
| cg08579540 | 2   | 175652652 | Other         | NA        | 41.1329836  | 2.53E-05 | 0.026298 |
| cg19619756 | 5   | 1219499   | S_Shore       | SLC6A19   | 78.2060109  | 2.56E-05 | 0.026467 |
| cg17171407 | 8   | 119960777 | N_Shelf       | TNFRSF11B | -27.057862  | 2.58E-05 | 0.026615 |
| cg18033335 | 19  | 11034897  | S_Shelf       | YIPF2     | 79.1180377  | 2.60E-05 | 0.026615 |
| cg24365867 | 11  | 10715595  | Other         | MRVI1     | 45.2522526  | 2.61E-05 | 0.026615 |
| cg25576997 | 14  | 56257750  | Other         | LINC00520 | -22.50163   | 2.61E-05 | 0.026615 |
| cg13912573 | 9   | 92293297  | S_Shore       | UNQ6494   | 61.2996698  | 2.62E-05 | 0.026615 |
| cg02023973 | 16  | 1519973   | Other         | CLCN7     | -50.621879  | 2.63E-05 | 0.026615 |
| cg06112654 | 10  | 35505599  | S_Shore       | NA        | -44.878085  | 2.66E-05 | 0.026716 |
| cg23433345 | 12  | 77059628  | Other         | NA        | -66.49326   | 2.68E-05 | 0.026716 |
| cg00431968 | 8   | 92528313  | Other         | NA        | -45.675366  | 2.69E-05 | 0.026716 |
| cg20317872 | 1   | 111743202 | N_Shelf       | DENND2D   | -63.805084  | 2.69E-05 | 0.026716 |
| cg15401418 | 17  | 75316383  | Other         | 9-Sep     | 45.6995799  | 2.71E-05 | 0.026716 |

Supplemental Table 1. 2,573 BMI-Associated Methylation Sites in the Normal Breast Study, adjusting for age, race, and alcohol use

| Probe      | CHR | MAPINFO   | CPG Location* | Gene     | Coefficient | p-value  | q-value  |
|------------|-----|-----------|---------------|----------|-------------|----------|----------|
| cg22438522 | 4   | 646293    | N_Shore       | PDE6B    | -125.15986  | 2.72E-05 | 0.026716 |
| cg09248380 | 4   | 111397190 | N_Shore       | ENPEP    | 41.0713517  | 2.73E-05 | 0.026716 |
| cg14485633 | 9   | 136783440 | Other         | VAV2     | -36.912221  | 2.73E-05 | 0.026716 |
| cg26639479 | 16  | 30363681  | Other         | CD2BP2   | 47.6666275  | 2.73E-05 | 0.026716 |
| cg22057874 | 2   | 179184866 | N_Shelf       | OSBPL6   | -43.754668  | 2.73E-05 | 0.026716 |
| cg11844079 | 1   | 160001979 | Island        | PIGM     | 432.257681  | 2.74E-05 | 0.026716 |
| cg15335334 | 17  | 73642547  | Other         | SMIM6    | -44.963385  | 2.75E-05 | 0.026743 |
| cg09743596 | 16  | 89180843  | Other         | ACSF3    | -80.451472  | 2.79E-05 | 0.026769 |
| cg02129017 | 6   | 168983500 | Other         | SMOC2    | -105.53379  | 2.79E-05 | 0.026769 |
| cg16259171 | 11  | 73660510  | Other         | DNAJB13  | -56.901468  | 2.79E-05 | 0.026769 |
| cg23845168 | 17  | 31271015  | Other         | NA       | 38.6872284  | 2.80E-05 | 0.026769 |
| cg14155193 | 9   | 129148742 | Other         | MVB12B   | -58.400645  | 2.86E-05 | 0.027244 |
| cg18887230 | 7   | 98739627  | N_Shore       | SMURF1   | 64.8008504  | 2.86E-05 | 0.027244 |
| cg17209284 | 2   | 231235574 | Other         | SP140L   | -75.86462   | 2.90E-05 | 0.027356 |
| cg12097896 | 8   | 26471364  | N_Shore       | DPYSL2   | -84.521157  | 2.91E-05 | 0.027356 |
| cg03173570 | 21  | 33031392  | Other         | SOD1     | 54.5762085  | 2.91E-05 | 0.027356 |
| cg12104698 | 7   | 139529130 | Other         | TBXAS1   | -76.437196  | 2.92E-05 | 0.027356 |
| cg01900371 | 2   | 27256120  | Island        | TMEM214  | 537.355016  | 2.97E-05 | 0.02775  |
| cg09423875 | 6   | 32014663  | Other         | TNXB     | 85.5462319  | 2.98E-05 | 0.02775  |
| cg11869499 | 15  | 89872984  | N_Shelf       | POLG     | -67.992263  | 2.99E-05 | 0.027801 |
| cg04177826 | 22  | 50985681  | Island        | KLHDC7B  | 43.2090732  | 3.01E-05 | 0.027873 |
| cg02933639 | 4   | 8207325   | Other         | SH3TC1   | -60.349047  | 3.03E-05 | 0.027884 |
| cg00259404 | 6   | 28885568  | Other         | TRIM27   | -53.016505  | 3.06E-05 | 0.027884 |
| cg22501604 | 4   | 187647344 | S_Shelf       | FAT1     | 91.5324335  | 3.07E-05 | 0.027884 |
| cg02322889 | 4   | 25101274  | Other         | NA       | 39.1599398  | 3.07E-05 | 0.027884 |
| cg15744333 | 6   | 32372310  | Island        | BTNL2    | 39.4261259  | 3.07E-05 | 0.027884 |
| cg18887096 | 2   | 219472410 | Other         | PLCD4    | 48.0406278  | 3.08E-05 | 0.027884 |
| cg20635370 | 10  | 80666318  | Other         | NA       | -39.786465  | 3.08E-05 | 0.027884 |
| cg19232382 | 10  | 134953542 | N_Shore       | NA       | 26.8986525  | 3.11E-05 | 0.027961 |
| cg03046611 | 3   | 55340399  | Other         | NA       | 23.4647084  | 3.12E-05 | 0.027961 |
| cg12297590 | 6   | 158080750 | Other         | ZDHHC14  | -23.050568  | 3.12E-05 | 0.027961 |
| cg20652759 | 10  | 409280    | Island        | DIP2C    | -127.58527  | 3.13E-05 | 0.027961 |
| cg25652701 | 7   | 105348517 | Other         | ATXN7L1  | -52.611492  | 3.16E-05 | 0.028108 |
| cg25527547 | 7   | 100862300 | S_Shore       | PLOD3    | 33.6561577  | 3.18E-05 | 0.028232 |
| cg06787669 | 7   | 45018789  | Other         | MYO1G    | -49.757542  | 3.20E-05 | 0.028284 |
| cg21190644 | 6   | 2659375   | Other         | NA       | -68.405581  | 3.21E-05 | 0.028284 |
| cg21412215 | 8   | 39973292  | Other         | NA       | 50.1729322  | 3.22E-05 | 0.028284 |
| cg03373714 | 2   | 147632094 | Other         | NA       | -28.75268   | 3.24E-05 | 0.028284 |
| cg04229928 | 11  | 119303807 | Other         | USP2-AS1 | 60.3912133  | 3.24E-05 | 0.028284 |
| cg26011014 | 1   | 40783003  | Island        | COL9A2   | 319.182806  | 3.25E-05 | 0.028284 |
| cg08981041 | 4   | 117624191 | N_Shelf       | NA       | 61.8550504  | 3.26E-05 | 0.028324 |

Supplemental Table 1. 2,573 BMI-Associated Methylation Sites in the Normal Breast Study, adjusting for age, race, and alcohol use

| Probe      | CHR | MAPINFO   | CPG Location* | Gene      | Coefficient | p-value  | q-value  |
|------------|-----|-----------|---------------|-----------|-------------|----------|----------|
| cg14669515 | 1   | 9386821   | Other         | SPSB1     | 47.0535874  | 3.29E-05 | 0.028424 |
| cg09996284 | 1   | 156211851 | N_Shelf       | BGLAP     | -58.796779  | 3.30E-05 | 0.028424 |
| cg18512930 | 4   | 1496880   | S_Shelf       | NA        | 46.2925166  | 3.30E-05 | 0.028424 |
| cg25505880 | 11  | 62574338  | S_Shore       | NXF1      | -63.738925  | 3.32E-05 | 0.028498 |
| cg24751773 | 2   | 107192564 | Other         | NA        | 67.0908346  | 3.33E-05 | 0.028498 |
| cg00035969 | 1   | 112159097 | N_Shelf       | RAP1A     | -34.467067  | 3.35E-05 | 0.028593 |
| cg04217515 | 21  | 46325853  | S_Shore       | ITGB2     | -50.825933  | 3.38E-05 | 0.028647 |
| cg15244101 | 12  | 49627624  | N_Shore       | NA        | -47.832415  | 3.39E-05 | 0.028647 |
| cg01457077 | 2   | 239228573 | N_Shore       | TRAF3IP1  | 80.9412732  | 3.39E-05 | 0.028647 |
| cg11234339 | 11  | 10907448  | Other         | NA        | 58.4151421  | 3.42E-05 | 0.028687 |
| cg06385449 | 11  | 63974123  | N_Shore       | FERMT3    | -64.538606  | 3.43E-05 | 0.028687 |
| cg27563126 | 9   | 132438028 | Island        | PRRX2     | 62.6022708  | 3.44E-05 | 0.028687 |
| cg06645778 | 2   | 64680425  | Other         | LGALS1    | 37.5829967  | 3.49E-05 | 0.028687 |
| cg04568981 | 1   | 53125850  | N_Shore       | NA        | 58.8984383  | 3.49E-05 | 0.028687 |
| cg19502709 | 5   | 169816214 | Other         | KCNMB1    | -30.095045  | 3.50E-05 | 0.028687 |
| cg08114852 | 11  | 13461802  | Other         | BTBD10    | 95.7169076  | 3.50E-05 | 0.028687 |
| cg00639635 | 6   | 143837891 | Other         | FUCA2     | -57.370451  | 3.50E-05 | 0.028687 |
| cg16262559 | 4   | 1535729   | S_Shore       | NA        | 35.8370451  | 3.52E-05 | 0.028687 |
| cg09781650 | 16  | 66285054  | Other         | NA        | 30.7217039  | 3.53E-05 | 0.028687 |
| cg19268453 | 6   | 32905114  | Other         | HLA-DMB   | -59.625288  | 3.54E-05 | 0.028687 |
| cg00770372 | 8   | 37237473  | Other         | NA        | 32.0461847  | 3.55E-05 | 0.028687 |
| cg08284638 | 2   | 86255154  | Other         | LOC90784  | -55.764072  | 3.55E-05 | 0.028687 |
| cg04454664 | 5   | 71748552  | Other         | ZNF366    | 51.5315862  | 3.55E-05 | 0.028687 |
| cg18174678 | 1   | 42801761  | S_Shore       | FOXJ3     | 31.4224809  | 3.56E-05 | 0.028687 |
| cg14105566 | 2   | 121107846 | N_Shore       | INHBB     | -64.866658  | 3.57E-05 | 0.028687 |
| cg13357416 | 17  | 707032    | S_Shore       | NXN       | 35.2537381  | 3.57E-05 | 0.028687 |
| cg10271819 | 7   | 139426030 | Other         | HIPK2     | -51.72299   | 3.58E-05 | 0.028687 |
| cg08094206 | 6   | 30122523  | Other         | TRIM10    | 30.4016938  | 3.60E-05 | 0.028738 |
| cg00566997 | 17  | 9675101   | Island        | DHRS7C    | -109.45129  | 3.62E-05 | 0.028738 |
| cg00974579 | 16  | 88990188  | N_Shelf       | CBFA2T3   | 69.6778789  | 3.62E-05 | 0.028738 |
| cg07830160 | 1   | 159880327 | Other         | NA        | -39.592701  | 3.63E-05 | 0.028738 |
| cg13135609 | 8   | 125123369 | Other         | FER1L6    | -72.135677  | 3.65E-05 | 0.028821 |
| cg18057548 | 19  | 3617614   | S_Shelf       | CACTIN    | -40.88323   | 3.66E-05 | 0.028821 |
| cg17627898 | 12  | 118782453 | Other         | TAOK3     | -48.647724  | 3.68E-05 | 0.028895 |
| cg16261114 | 15  | 99551997  | Other         | PGPEP1L   | -71.496347  | 3.69E-05 | 0.028908 |
| cg13603551 | 7   | 150549406 | Other         | AOC1      | -64.301304  | 3.70E-05 | 0.028917 |
| cg00294149 | 16  | 75604552  | S_Shelf       | GABARAPL2 | -38.899042  | 3.72E-05 | 0.028973 |
| cg10881242 | 5   | 171057282 | Island        | NA        | 84.3752231  | 3.73E-05 | 0.028973 |
| cg10103528 | 1   | 22979739  | Other         | C1QB      | -49.800635  | 3.75E-05 | 0.029054 |
| cg23360388 | 5   | 94726774  | S_Shore       | FAM81B    | -32.868026  | 3.78E-05 | 0.029142 |
| cg20069688 | 6   | 31941049  | Other         | DOM3Z     | 83.9046035  | 3.78E-05 | 0.029142 |

Supplemental Table 1. 2,573 BMI-Associated Methylation Sites in the Normal Breast Study, adjusting for age, race, and alcohol use

| Probe      | CHR | MAPINFO   | CPG Location* | Gene     | Coefficient | p-value  | q-value  |
|------------|-----|-----------|---------------|----------|-------------|----------|----------|
| cg03409108 | 6   | 34489785  | Other         | PACSIN1  | -65.02507   | 3.80E-05 | 0.029142 |
| cg02144258 | 2   | 220391374 | S_Shelf       | ASIC4    | -54.697975  | 3.81E-05 | 0.029142 |
| cg16823610 | 4   | 40856529  | N_Shelf       | APBB2    | -109.68502  | 3.82E-05 | 0.029142 |
| cg06942450 | 20  | 57583520  | S_Shore       | CTSZ     | -78.869875  | 3.83E-05 | 0.029142 |
| cg23051299 | 2   | 75938289  | S_Shore       | GCFC2    | 98.0338968  | 3.84E-05 | 0.029142 |
| cg09259534 | 1   | 218472841 | Other         | RRP15    | 38.1901279  | 3.85E-05 | 0.029142 |
| cg22460123 | 12  | 52638294  | N_Shore       | KRT7     | -35.727862  | 3.85E-05 | 0.029142 |
| cg04325187 | X   | 149930807 | Island        | MTMR1    | 67.3464496  | 3.88E-05 | 0.029165 |
| cg09801824 | 10  | 74076930  | N_Shelf       | NA       | -65.047106  | 3.89E-05 | 0.029165 |
| cg26078407 | 2   | 240225062 | Other         | MIR4269  | -43.687378  | 3.92E-05 | 0.029165 |
| cg22751954 | 6   | 143023932 | Other         | NA       | -63.606968  | 3.92E-05 | 0.029165 |
| cg00828556 | 3   | 196351986 | Other         | NA       | -42.531806  | 3.92E-05 | 0.029165 |
| cg09821400 | 10  | 33654419  | Other         | NA       | -78.308452  | 3.93E-05 | 0.029165 |
| cg24641737 | 1   | 111743271 | N_Shelf       | DENND2D  | -46.57334   | 3.93E-05 | 0.029165 |
| cg03179542 | 7   | 2647333   | S_Shore       | IQCE     | -38.872431  | 3.96E-05 | 0.029318 |
| cg24889694 | 8   | 101522535 | Other         | ANKRD46  | 35.2295018  | 3.99E-05 | 0.029318 |
| cg04516672 | 10  | 126411663 | Other         | FAM53B   | -28.892297  | 3.99E-05 | 0.029318 |
| cg09941581 | 4   | 124220074 | Other         | SPATA5   | 36.3894742  | 3.99E-05 | 0.029318 |
| cg17190781 | 6   | 40387783  | Other         | LRFN2    | -120.30357  | 4.02E-05 | 0.029318 |
| cg21871338 | 14  | 87262857  | Other         | NA       | 40.1977212  | 4.02E-05 | 0.029318 |
| cg02824983 | 15  | 38659681  | Other         | NA       | -38.086201  | 4.05E-05 | 0.029318 |
| cg14886850 | 14  | 75122289  | Other         | NA       | 25.6625128  | 4.05E-05 | 0.029318 |
| cg00836101 | 15  | 39876248  | S_Shelf       | THBS1    | 37.3496282  | 4.06E-05 | 0.029318 |
| cg16384774 | 14  | 89626932  | Other         | FOXN3    | -314.66179  | 4.07E-05 | 0.029318 |
| cg02073763 | 2   | 46064034  | N_Shore       | PRKCE    | -66.956064  | 4.07E-05 | 0.029318 |
| cg19201009 | 10  | 99475406  | S_Shore       | MARVELD1 | 45.1318555  | 4.07E-05 | 0.029318 |
| cg13856674 | 15  | 93722590  | Other         | NA       | -44.460103  | 4.09E-05 | 0.029354 |
| cg03479209 | 3   | 58020999  | Other         | FLNB     | -40.565743  | 4.11E-05 | 0.029388 |
| cg25035489 | 1   | 6036550   | Other         | NPHP4    | -76.69535   | 4.14E-05 | 0.029395 |
| cg26124526 | 5   | 60618932  | Other         | NA       | -43.076211  | 4.15E-05 | 0.029395 |
| cg25953692 | 6   | 31695415  | Other         | DDAH2    | -63.00609   | 4.16E-05 | 0.029395 |
| cg08688659 | 11  | 35249965  | N_Shore       | CD44     | -71.264895  | 4.16E-05 | 0.029395 |
| cg23753351 | 4   | 40860327  | S_Shore       | APBB2    | -28.2304    | 4.17E-05 | 0.029395 |
| cg03190219 | 7   | 25898688  | Island        | NA       | -48.041577  | 4.18E-05 | 0.029395 |
| cg19230025 | 19  | 35488496  | N_Shelf       | GRAMD1A  | -23.604447  | 4.18E-05 | 0.029395 |
| cg00651488 | 16  | 85236465  | Other         | NA       | 58.9369027  | 4.19E-05 | 0.029395 |
| cg11110759 | 14  | 101282683 | Other         | MIR2392  | -73.760065  | 4.20E-05 | 0.029395 |
| cg17184477 | 15  | 67360705  | S_Shore       | SMAD3    | 51.2676346  | 4.22E-05 | 0.029413 |
| cg10166664 | 5   | 60624229  | N_Shelf       | ZSWIM6   | -29.876366  | 4.25E-05 | 0.029413 |
| cg15326297 | 2   | 235464680 | Other         | NA       | 49.4168644  | 4.27E-05 | 0.029413 |
| cg26783127 | 17  | 79128918  | N_Shelf       | AATK     | -80.097782  | 4.27E-05 | 0.029413 |

Supplemental Table 1. 2,573 BMI-Associated Methylation Sites in the Normal Breast Study, adjusting for age, race, and alcohol use

| Probe      | CHR | MAPINFO   | CPG Location* | Gene       | Coefficient | p-value  | q-value  |
|------------|-----|-----------|---------------|------------|-------------|----------|----------|
| cg04120400 | 2   | 133425064 | N_Shore       | LYPD1      | -55.333952  | 4.28E-05 | 0.029413 |
| cg13795831 | 20  | 57582706  | S_Shore       | CTSZ       | -45.397456  | 4.29E-05 | 0.029413 |
| cg06830360 | 8   | 142413013 | Other         | NA         | -42.621101  | 4.31E-05 | 0.029413 |
| cg21271945 | 1   | 2080081   | N_Shelf       | PRKCZ      | -39.492766  | 4.31E-05 | 0.029413 |
| cg05964212 | 3   | 48936979  | S_Shore       | SLC25A20   | -65.467584  | 4.34E-05 | 0.029413 |
| cg25282976 | 17  | 79005047  | N_Shore       | BAIAP2-AS1 | -35.084387  | 4.35E-05 | 0.029413 |
| cg24718773 | 2   | 138739074 | Other         | HNMT       | -60.196709  | 4.36E-05 | 0.029413 |
| cg01534527 | 3   | 38003247  | Other         | CTDSPL     | -45.627969  | 4.37E-05 | 0.029413 |
| cg15755265 | 15  | 63673502  | N_Shore       | CA12       | 125.636093  | 4.39E-05 | 0.029413 |
| cg02555923 | 3   | 14319984  | Other         | NA         | -70.046562  | 4.40E-05 | 0.029413 |
| cg20418394 | 10  | 72254335  | S_Shore       | PALD1      | -49.99122   | 4.40E-05 | 0.029413 |
| cg10001720 | 1   | 31231363  | Other         | LAPTM5     | -37.179954  | 4.40E-05 | 0.029413 |
| cg05596664 | 3   | 171179040 | Other         | TNIK       | 389.893177  | 4.40E-05 | 0.029413 |
| cg25452067 | 10  | 101281603 | Other         | NA         | 50.3050305  | 4.41E-05 | 0.029413 |
| cg18589102 | 10  | 132683444 | Other         | NA         | 44.0123695  | 4.41E-05 | 0.029413 |
| cg05061769 | 15  | 59700360  | Island        | NA         | -27.782741  | 4.41E-05 | 0.029413 |
| cg21880476 | 6   | 885298    | N_Shelf       | NA         | -29.867734  | 4.43E-05 | 0.029443 |
| cg24882673 | 8   | 40625224  | Other         | ZMAT4      | -19.58419   | 4.45E-05 | 0.029551 |
| cg25360761 | 19  | 35819943  | Other         | CD22       | -36.096394  | 4.48E-05 | 0.029628 |
| cg03750478 | 16  | 29757375  | Other         | C16orf54   | -58.603759  | 4.52E-05 | 0.029628 |
| cg16097772 | 12  | 69742232  | Other         | LYZ        | -64.95904   | 4.53E-05 | 0.029628 |
| cg04405704 | 6   | 31369119  | N_Shore       | MICA       | -28.621806  | 4.55E-05 | 0.029628 |
| cg20610950 | 17  | 75096202  | Other         | SEC14L1    | -44.390487  | 4.56E-05 | 0.029628 |
| cg06481431 | 19  | 6745321   | N_Shore       | TRIP10     | 35.9757201  | 4.57E-05 | 0.029628 |
| cg01185640 | 6   | 158053980 | Other         | ZDHHC14    | 28.3244275  | 4.59E-05 | 0.029628 |
| cg19139589 | 2   | 25149093  | Other         | NA         | -87.637562  | 4.60E-05 | 0.029628 |
| cg25414209 | 13  | 36785834  | N_Shore       | SOHLH2     | -93.113986  | 4.61E-05 | 0.029628 |
| cg03549705 | 16  | 29674618  | N_Shelf       | SPN        | -82.662793  | 4.61E-05 | 0.029628 |
| cg04010915 | 12  | 110547053 | Other         | NA         | 35.3388656  | 4.62E-05 | 0.029628 |
| cg25907743 | 10  | 90519680  | Other         | LIPN       | -49.052284  | 4.62E-05 | 0.029628 |
| cg21284779 | 1   | 155910526 | Other         | RXFP4      | -50.948998  | 4.62E-05 | 0.029628 |
| cg26907302 | 10  | 127464488 | S_Shore       | MMP21      | -159.2457   | 4.64E-05 | 0.029628 |
| cg04217082 | 8   | 37889752  | S_Shore       | EIF4EBP1   | 31.5102965  | 4.64E-05 | 0.029628 |
| cg06305891 | 3   | 195897904 | Other         | NA         | -56.697309  | 4.65E-05 | 0.029628 |
| cg21129729 | 2   | 42719678  | N_Shore       | KCNG3      | -99.16111   | 4.65E-05 | 0.029628 |
| cg03807883 | 11  | 36535685  | S_Shelf       | TRAF6      | 40.9444258  | 4.67E-05 | 0.029655 |
| cg10655236 | 17  | 753974    | Other         | NXN        | 29.5313303  | 4.68E-05 | 0.029655 |
| cg03125531 | 8   | 1906418   | Other         | ARHGEF10   | 27.0878974  | 4.69E-05 | 0.029655 |
| cg01833890 | 12  | 2564063   | Other         | CACNA1C    | -46.809191  | 4.71E-05 | 0.029655 |
| cg21390363 | 17  | 18171734  | S_Shelf       | NA         | 47.4780751  | 4.71E-05 | 0.029655 |
| cg23886165 | 13  | 76209457  | N_Shore       | LMO7       | 31.6458954  | 4.72E-05 | 0.029655 |

Supplemental Table 1. 2,573 BMI-Associated Methylation Sites in the Normal Breast Study, adjusting for age, race, and alcohol use

| Probe      | CHR | MAPINFO   | CPG Location* | Gene      | Coefficient | p-value  | q-value  |
|------------|-----|-----------|---------------|-----------|-------------|----------|----------|
| cg12446613 | 5   | 159072916 | N_Shore       | NA        | -66.693123  | 4.74E-05 | 0.029655 |
| cg11825501 | 7   | 4168039   | Other         | SDK1      | -92.834915  | 4.74E-05 | 0.029655 |
| cg15860924 | 1   | 33612977  | Island        | TRIM62    | 59.1122479  | 4.75E-05 | 0.029655 |
| cg26441979 | 8   | 79143895  | Other         | NA        | -53.896612  | 4.76E-05 | 0.029655 |
| cg03672272 | 22  | 46470191  | S_Shore       | NA        | 42.0085964  | 4.79E-05 | 0.029772 |
| cg03997039 | 16  | 29703361  | N_Shelf       | QPRT      | -69.878984  | 4.81E-05 | 0.029837 |
| cg10109731 | 16  | 88472541  | Other         | NA        | 36.0504607  | 4.83E-05 | 0.029863 |
| cg13593887 | 9   | 138159326 | S_Shelf       | NA        | -86.653414  | 4.83E-05 | 0.029863 |
| cg00539174 | 20  | 57583434  | S_Shore       | CTSZ      | -66.213112  | 4.86E-05 | 0.029863 |
| cg11067407 | 11  | 113599852 | Other         | NA        | -44.814561  | 4.86E-05 | 0.029863 |
| cg25299676 | 7   | 116312739 | S_Shore       | MET       | 110.232965  | 4.87E-05 | 0.029863 |
| cg10855531 | 2   | 62702472  | Other         | NA        | -77.16182   | 4.89E-05 | 0.029863 |
| cg05300378 | 17  | 74128731  | Other         | NA        | 54.9505023  | 4.90E-05 | 0.029863 |
| cg17342469 | 22  | 46473074  | Other         | NA        | 35.2719643  | 4.90E-05 | 0.029863 |
| cg01721313 | 3   | 169751609 | N_Shelf       | GPR160    | -86.68872   | 4.92E-05 | 0.029863 |
| cg11433866 | 12  | 115126908 | S_Shore       | TBX3      | -67.216167  | 4.94E-05 | 0.029863 |
| cg19701213 | 19  | 42817154  | Other         | TMEM145   | 52.8805939  | 4.97E-05 | 0.029863 |
| cg04790874 | 19  | 42381950  | N_Shore       | CD79A     | -62.445796  | 4.97E-05 | 0.029863 |
| cg21513254 | 6   | 30624502  | Other         | DHX16     | -73.634461  | 4.98E-05 | 0.029863 |
| cg02016065 | 3   | 157290927 | Other         | C3orf55   | -64.548407  | 4.99E-05 | 0.029863 |
| cg00250645 | 8   | 72534391  | Other         | NA        | -52.163517  | 4.99E-05 | 0.029863 |
| cg20306863 | 1   | 3593812   | Other         | TP73      | -63.157436  | 5.01E-05 | 0.029863 |
| cg07104557 | 7   | 1036653   | N_Shelf       | C7orf50   | -87.490879  | 5.02E-05 | 0.029863 |
| cg08884752 | 1   | 2162001   | S_Shore       | SKI       | 39.7986268  | 5.03E-05 | 0.029863 |
| cg15454698 | 3   | 14473580  | Other         | SLC6A6    | -43.136588  | 5.03E-05 | 0.029863 |
| cg18133072 | 1   | 28287782  | S_Shore       | XKR8      | 73.1431747  | 5.04E-05 | 0.029863 |
| cg20682563 | 5   | 133460874 | Other         | TCF7      | 36.8516844  | 5.06E-05 | 0.029863 |
| cg19252956 | 9   | 273072    | Other         | DOCK8     | -44.078081  | 5.07E-05 | 0.029863 |
| cg25426302 | 6   | 32120826  | Other         | PPT2      | 27.7959191  | 5.08E-05 | 0.029863 |
| cg20283498 | 10  | 73387917  | N_Shore       | CDH23     | -59.225026  | 5.08E-05 | 0.029863 |
| cg10712687 | 11  | 92714801  | Other         | MTNR1B    | -441.9617   | 5.09E-05 | 0.029863 |
| cg23671196 | 15  | 50405520  | Other         | ATP8B4    | -56.055741  | 5.09E-05 | 0.029863 |
| cg16527057 | 1   | 157069242 | Other         | ETV3L     | -88.644443  | 5.10E-05 | 0.029863 |
| cg16413842 | 6   | 170191082 | S_Shore       | LINC00574 | 23.243064   | 5.13E-05 | 0.029997 |
| cg04919519 | 14  | 103524989 | S_Shore       | CDC42BPB  | 128.659996  | 5.17E-05 | 0.030091 |
| cg14789659 | 10  | 63809073  | Other         | ARID5B    | 50.228694   | 5.18E-05 | 0.030091 |
| cg12405048 | 12  | 112074086 | Other         | NA        | 42.9616794  | 5.18E-05 | 0.030091 |
| cg01809797 | 22  | 31796612  | S_Shore       | DRG1      | 31.7291601  | 5.19E-05 | 0.030107 |
| cg09798061 | 16  | 1482603   | Island        | NA        | -61.084341  | 5.20E-05 | 0.030107 |
| cg04207142 | 8   | 86089106  | N_Shore       | E2F5      | 45.2911599  | 5.24E-05 | 0.030117 |
| cg12073251 | 8   | 141568652 | Other         | AGO2      | -50.019567  | 5.25E-05 | 0.030117 |

Supplemental Table 1. 2,573 BMI-Associated Methylation Sites in the Normal Breast Study, adjusting for age, race, and alcohol use

| Probe      | CHR | MAPINFO   | CPG Location* | Gene         | Coefficient | p-value  | q-value  |
|------------|-----|-----------|---------------|--------------|-------------|----------|----------|
| cg02889973 | 1   | 234977572 | Other         | NA           | -36.422906  | 5.25E-05 | 0.030117 |
| cg19909613 | 8   | 109487153 | Other         | EMC2         | -43.132168  | 5.26E-05 | 0.030117 |
| cg14512326 | 9   | 86240166  | N_Shelf       | IDNK         | -72.330849  | 5.29E-05 | 0.030117 |
| cg12207930 | 3   | 151048337 | Other         | P2RY13       | -56.449032  | 5.29E-05 | 0.030117 |
| cg15849098 | 7   | 150211761 | S_Shore       | GIMAP7       | -24.160955  | 5.29E-05 | 0.030117 |
| cg11982525 | 7   | 106505688 | Other         | PIK3CG       | -25.838656  | 5.29E-05 | 0.030117 |
| cg19744173 | 2   | 112913178 | N_Shelf       | FBLN7        | -61.815999  | 5.32E-05 | 0.030218 |
| cg18315380 | 7   | 1095666   | Other         | GPR146       | -42.597287  | 5.37E-05 | 0.03038  |
| cg11578064 | 12  | 112074044 | N_Shore       | NA           | 30.762188   | 5.37E-05 | 0.03038  |
| cg06462065 | 19  | 55885168  | N_Shelf       | TMEM190      | -58.381893  | 5.43E-05 | 0.03038  |
| cg09723979 | 11  | 19736248  | S_Shore       | LOC100126784 | 127.238147  | 5.44E-05 | 0.03038  |
| cg15776617 | 2   | 9324111   | Other         | NA           | -31.721869  | 5.45E-05 | 0.03038  |
| cg26215003 | X   | 20431166  | Other         | NA           | -80.630789  | 5.45E-05 | 0.03038  |
| cg23445003 | 7   | 101535821 | Other         | CUX1         | -44.354258  | 5.46E-05 | 0.03038  |
| cg06626655 | 1   | 38099916  | Island        | RSPO1        | 127.698886  | 5.48E-05 | 0.03038  |
| cg11802899 | 14  | 52867870  | Other         | NA           | -57.146647  | 5.48E-05 | 0.03038  |
| cg02670637 | 1   | 56184693  | Other         | NA           | 46.7950154  | 5.49E-05 | 0.03038  |
| cg09337852 | 7   | 134464288 | Other         | CALD1        | 72.0380486  | 5.49E-05 | 0.03038  |
| cg27151122 | 12  | 50447407  | S_Shore       | ASIC1        | -64.360064  | 5.50E-05 | 0.03038  |
| cg12127196 | 1   | 50489240  | N_Shore       | AGBL4        | 46.7685896  | 5.50E-05 | 0.03038  |
| cg02592062 | 19  | 19043788  | N_Shelf       | HOMER3       | -55.469884  | 5.50E-05 | 0.03038  |
| cg03254137 | 17  | 17661258  | Other         | RAI1         | -79.213444  | 5.51E-05 | 0.03038  |
| cg02586212 | 1   | 192544902 | Other         | RGS1         | -70.00963   | 5.61E-05 | 0.030716 |
| cg22771161 | 19  | 4788146   | N_Shelf       | FEM1A        | 30.8204737  | 5.62E-05 | 0.030716 |
| cg06579738 | 11  | 111165311 | N_Shelf       | C11orf93     | 28.5172713  | 5.63E-05 | 0.030716 |
| cg18569141 | 15  | 90727995  | S_Shelf       | SEMA4B       | 74.0983128  | 5.64E-05 | 0.030716 |
| cg17013990 | 1   | 161091682 | Island        | NIT1         | -51.658016  | 5.64E-05 | 0.030716 |
| cg14619064 | 17  | 56355331  | Island        | MPO          | -81.393166  | 5.65E-05 | 0.030716 |
| cg10163050 | X   | 153637650 | N_Shelf       | DNASE1L1     | -71.771804  | 5.66E-05 | 0.030716 |
| cg20100768 | 13  | 80706924  | Other         | NA           | 89.0826798  | 5.67E-05 | 0.030716 |
| cg25744957 | 4   | 7106195   | Other         | FLJ36777     | -88.289387  | 5.68E-05 | 0.030716 |
| cg19039313 | 2   | 136634366 | S_Shore       | MCM6         | -30.798233  | 5.69E-05 | 0.030716 |
| cg23590660 | 12  | 8205602   | Other         | FOXJ2        | -36.4027    | 5.70E-05 | 0.030716 |
| cg23165541 | 15  | 64338164  | Island        | DAPK2        | 39.9780891  | 5.71E-05 | 0.030716 |
| cg18186672 | 2   | 71679841  | N_Shore       | DYSF         | -31.940136  | 5.72E-05 | 0.030716 |
| cg01945913 | 5   | 1469001   | S_Shore       | LPCAT1       | -95.249811  | 5.73E-05 | 0.030716 |
| cg18121946 | 17  | 12697550  | S_Shelf       | ARHGAP44     | -91.704937  | 5.74E-05 | 0.030716 |
| cg26688315 | 2   | 218027591 | Other         | NA           | 63.2841044  | 5.75E-05 | 0.030718 |
| cg24126180 | 7   | 128580582 | S_Shore       | IRF5         | -58.971168  | 5.77E-05 | 0.030718 |
| cg21067465 | 11  | 86304288  | Other         | ME3          | -44.151936  | 5.78E-05 | 0.030718 |
| cg24259363 | 3   | 8525217   | Other         | LMCD1-AS1    | 34.0560537  | 5.80E-05 | 0.030718 |

Supplemental Table 1. 2,573 BMI-Associated Methylation Sites in the Normal Breast Study, adjusting for age, race, and alcohol use

| Probe      | CHR | MAPINFO   | CPG Location* | Gene         | Coefficient | p-value  | q-value  |
|------------|-----|-----------|---------------|--------------|-------------|----------|----------|
| cg02794695 | 8   | 134072611 | Other         | SLA          | -56.421103  | 5.80E-05 | 0.030718 |
| cg27560796 | 6   | 33864689  | Other         | LOC100507584 | 32.3093542  | 5.81E-05 | 0.030718 |
| cg15722438 | 19  | 8552601   | S_Shore       | HNRNPM       | -59.268855  | 5.84E-05 | 0.030718 |
| cg05117638 | 6   | 113952661 | Other         | NA           | -36.121565  | 5.85E-05 | 0.030718 |
| cg02342791 | 15  | 31508943  | S_Shore       | NA           | -42.666964  | 5.87E-05 | 0.030718 |
| cg05711445 | 7   | 139528855 | Other         | TBXAS1       | -37.422354  | 5.87E-05 | 0.030718 |
| cg26413855 | 6   | 30796199  | Other         | NA           | 34.4950877  | 5.88E-05 | 0.030718 |
| cg17146738 | 7   | 98739698  | Other         | SMURF1       | 69.0115106  | 5.89E-05 | 0.030718 |
| cg24778004 | 2   | 121461039 | N_Shore       | NA           | -44.626545  | 5.89E-05 | 0.030718 |
| cg16771652 | 16  | 50730385  | Other         | NOD2         | -55.905993  | 5.89E-05 | 0.030718 |
| cg04055490 | 17  | 8059012   | N_Shore       | PER1         | 44.393211   | 5.91E-05 | 0.030734 |
| cg07721872 | 16  | 87735256  | N_Shore       | NA           | -159.19381  | 5.91E-05 | 0.030734 |
| cg16911810 | 2   | 119596346 | N_Shelf       | NA           | -49.344465  | 5.94E-05 | 0.030817 |
| cg09676376 | 12  | 54779077  | Other         | ZNF385A      | -68.913194  | 5.96E-05 | 0.030865 |
| cg17918556 | 2   | 169372300 | Other         | CERS6        | 32.8175336  | 6.01E-05 | 0.031076 |
| cg07224067 | 17  | 48555565  | N_Shore       | RSAD1        | 52.9997514  | 6.04E-05 | 0.031144 |
| cg18759732 | 2   | 65889827  | Other         | NA           | 45.2726432  | 6.06E-05 | 0.031168 |
| cg00520380 | 22  | 31643997  | Other         | LIMK2        | 64.9213663  | 6.08E-05 | 0.031168 |
| cg02647408 | 11  | 88241594  | N_Shore       | GRM5-AS1     | -54.307039  | 6.09E-05 | 0.031168 |
| cg14745748 | 11  | 45717986  | Other         | NA           | -106.53306  | 6.10E-05 | 0.031168 |
| cg27214856 | 22  | 46473343  | Other         | NA           | 44.0128288  | 6.11E-05 | 0.031168 |
| cg02780988 | 17  | 39646994  | Other         | KRT36        | -60.872375  | 6.11E-05 | 0.031168 |
| cg15275312 | 3   | 50363059  | Other         | TUSC2        | -75.405832  | 6.14E-05 | 0.031169 |
| cg01578632 | 16  | 69958298  | Other         | WWP2         | 27.2703328  | 6.14E-05 | 0.031169 |
| cg14495916 | 3   | 171800301 | N_Shelf       | FNDC3B       | 30.5904295  | 6.14E-05 | 0.031169 |
| cg22720761 | 1   | 159769263 | Other         | FCRL6        | -93.861635  | 6.16E-05 | 0.031195 |
| cg07868561 | 5   | 148434089 | Other         | SH3TC2       | 32.1033906  | 6.18E-05 | 0.031195 |
| cg04602992 | 17  | 62009628  | Other         | CD79B        | -42.03323   | 6.18E-05 | 0.031195 |
| cg09783905 | 6   | 30294179  | N_Shelf       | HCG17        | 1209.72466  | 6.22E-05 | 0.031226 |
| cg16785938 | 4   | 10022984  | Island        | SLC2A9       | -68.535457  | 6.22E-05 | 0.031226 |
| cg01986263 | 20  | 58659848  | S_Shore       | NA           | -59.656444  | 6.22E-05 | 0.031226 |
| cg14565465 | 9   | 74298933  | Other         | TMEM2        | -36.471909  | 6.25E-05 | 0.031252 |
| cg00667937 | 2   | 168572563 | Island        | NA           | -62.246075  | 6.26E-05 | 0.031252 |
| cg14386312 | 19  | 58740861  | S_Shore       | ZNF544       | 57.2257572  | 6.29E-05 | 0.031252 |
| cg04078115 | 22  | 33278114  | Other         | SYN3         | -54.510223  | 6.30E-05 | 0.031252 |
| cg17000076 | 10  | 1780263   | Island        | ADARB2       | 82.6575521  | 6.31E-05 | 0.031252 |
| cg07959070 | 22  | 50026188  | S_Shore       | C22orf34     | 24.4334634  | 6.31E-05 | 0.031252 |
| cg07103201 | 17  | 20171047  | Other         | SPECC1       | -29.262013  | 6.32E-05 | 0.031252 |
| cg03802185 | 7   | 101927846 | N_Shore       | SH2B2        | -72.28809   | 6.33E-05 | 0.031252 |
| cg19648306 | 2   | 179184854 | Other         | OSBPL6       | -29.963656  | 6.34E-05 | 0.031252 |
| cg00122679 | 10  | 125673028 | Other         | NA           | -37.248482  | 6.34E-05 | 0.031252 |

Supplemental Table 1. 2,573 BMI-Associated Methylation Sites in the Normal Breast Study, adjusting for age, race, and alcohol use

| Probe      | CHR | MAPINFO   | CPG Location* | Gene      | Coefficient | p-value  | q-value  |
|------------|-----|-----------|---------------|-----------|-------------|----------|----------|
| cg13131034 | 6   | 7590591   | Island        | SNRNP48   | 1387.97862  | 6.37E-05 | 0.031334 |
| cg09914444 | 1   | 46972183  | Other         | DMBX1     | -55.355707  | 6.38E-05 | 0.031334 |
| cg16230060 | 5   | 80530213  | Other         | CKMT2     | -94.591778  | 6.42E-05 | 0.031438 |
| cg12885302 | 10  | 129979348 | Other         | NA        | -23.700926  | 6.44E-05 | 0.031438 |
| cg21918313 | 2   | 73496203  | Island        | FBXO41    | 36.9866295  | 6.44E-05 | 0.031438 |
| cg01011367 | 10  | 124798692 | Other         | ACADSB    | -46.473583  | 6.46E-05 | 0.031438 |
| cg18576206 | 22  | 44392384  | S_Shore       | PARVB     | -44.867489  | 6.55E-05 | 0.031438 |
| cg06532880 | 5   | 176731545 | Island        | PRELID1   | 294.443443  | 6.55E-05 | 0.031438 |
| cg01604601 | 2   | 69846936  | Other         | AAK1      | -46.120172  | 6.56E-05 | 0.031438 |
| cg14774440 | 8   | 37730745  | Other         | RAB11FIP1 | -29.845515  | 6.56E-05 | 0.031438 |
| cg09977847 | 2   | 217070953 | Other         | XRCC5     | -47.589468  | 6.56E-05 | 0.031438 |
| cg02284273 | 10  | 14051679  | N_Shelf       | FRMD4A    | 42.4677388  | 6.57E-05 | 0.031438 |
| cg01033001 | 14  | 94637734  | Other         | PPP4R4    | 35.2444197  | 6.57E-05 | 0.031438 |
| cg20116800 | 17  | 74258224  | N_Shore       | UBALD2    | -32.510439  | 6.59E-05 | 0.031438 |
| cg26453169 | 5   | 57787167  | N_Shelf       | GAPT      | -32.039548  | 6.59E-05 | 0.031438 |
| cg12104246 | 6   | 24718589  | Other         | C6orf62   | 53.8798322  | 6.59E-05 | 0.031438 |
| cg03479289 | 11  | 33563377  | Other         | KIAA1549L | -73.015809  | 6.60E-05 | 0.031438 |
| cg12315466 | 2   | 233923814 | N_Shore       | INPP5D    | -101.12412  | 6.60E-05 | 0.031438 |
| cg02138124 | 8   | 37901697  | Other         | EIF4EBP1  | 41.828966   | 6.61E-05 | 0.031438 |
| cg08854586 | 13  | 34094789  | Other         | STARD13   | 33.9620545  | 6.62E-05 | 0.031438 |
| cg12119858 | 12  | 7023195   | N_Shore       | ENO2      | 54.0100795  | 6.63E-05 | 0.031438 |
| cg16836678 | 11  | 76836460  | Other         | MYO7A     | -51.466026  | 6.64E-05 | 0.031438 |
| cg17707487 | 13  | 114261869 | S_Shore       | TFDP1     | -46.752268  | 6.65E-05 | 0.031438 |
| cg20943461 | 17  | 76126886  | N_Shore       | TMC8      | -33.003007  | 6.65E-05 | 0.031438 |
| cg25332502 | 18  | 74832372  | S_Shore       | MBP       | -89.771267  | 6.66E-05 | 0.031438 |
| cg19761273 | 17  | 80232096  | S_Shore       | CSNK1D    | 91.1102529  | 6.69E-05 | 0.031438 |
| cg13850871 | 9   | 139583773 | S_Shore       | AGPAT2    | -41.36064   | 6.69E-05 | 0.031438 |
| cg04125371 | 15  | 48937213  | N_Shore       | FBN1      | 956.993122  | 6.70E-05 | 0.031438 |
| cg00231274 | 7   | 1263233   | Island        | NA        | -49.08049   | 6.70E-05 | 0.031438 |
| cg11589536 | 3   | 46250518  | Other         | CCR1      | -73.545345  | 6.71E-05 | 0.03145  |
| cg09137125 | 10  | 7486981   | Other         | NA        | -49.518472  | 6.75E-05 | 0.031464 |
| cg04535945 | 5   | 137781554 | Other         | REEP2     | -95.56207   | 6.78E-05 | 0.031464 |
| cg13972706 | 6   | 144671686 | Other         | UTRN      | -23.489785  | 6.78E-05 | 0.031464 |
| cg23374992 | 2   | 136872067 | N_Shore       | CXCR4     | -33.515623  | 6.80E-05 | 0.031464 |
| cg10126903 | 16  | 29675214  | N_Shelf       | SPN       | -54.111247  | 6.80E-05 | 0.031464 |
| cg09624565 | 22  | 37256900  | Other         | NCF4      | -41.763732  | 6.81E-05 | 0.031464 |
| cg11787176 | 14  | 96643191  | Other         | NA        | 41.2942289  | 6.82E-05 | 0.031464 |
| cg13121428 | 14  | 76446161  | N_Shelf       | TGFB3     | 34.9195492  | 6.82E-05 | 0.031464 |
| cg01111041 | 6   | 32121055  | Other         | PPT2      | 45.4465797  | 6.85E-05 | 0.031464 |
| cg00974864 | 1   | 161601053 | N_Shore       | FCGR3B    | -74.841087  | 6.85E-05 | 0.031464 |
| cg19118972 | 3   | 184323327 | S_Shore       | NA        | -73.377383  | 6.85E-05 | 0.031464 |

Supplemental Table 1. 2,573 BMI-Associated Methylation Sites in the Normal Breast Study, adjusting for age, race, and alcohol use

| Probe      | CHR | MAPINFO   | CPG Location* | Gene         | Coefficient | p-value  | q-value  |
|------------|-----|-----------|---------------|--------------|-------------|----------|----------|
| cg07721547 | 22  | 42475119  | N_Shore       | SMDT1        | 65.7790165  | 6.88E-05 | 0.031464 |
| cg18766033 | 5   | 73729290  | Other         | NA           | -40.165425  | 6.88E-05 | 0.031464 |
| cg23129452 | X   | 48542179  | Other         | WAS          | -44.685286  | 6.88E-05 | 0.031464 |
| cg16017420 | 12  | 1642879   | S_Shelf       | NA           | -52.649623  | 6.89E-05 | 0.031464 |
| cg18835472 | 6   | 26546056  | Other         | HMGNA4       | -45.368622  | 6.90E-05 | 0.031464 |
| cg16960675 | 3   | 58626434  | Other         | FAM3D        | 335.7137    | 6.91E-05 | 0.031464 |
| cg01997629 | 1   | 209929622 | Other         | TRAF3IP3     | -54.285562  | 6.92E-05 | 0.031464 |
| cg05703096 | 16  | 66887291  | Other         | CA7          | -36.56776   | 6.96E-05 | 0.031583 |
| cg26967723 | 5   | 169617918 | Other         | NA           | -78.238164  | 6.97E-05 | 0.031583 |
| cg16362481 | 2   | 128413009 | S_Shelf       | LIMS2        | -64.317409  | 6.98E-05 | 0.031596 |
| cg03514239 | 1   | 153329781 | Other         | S100A9       | -82.308537  | 6.99E-05 | 0.031601 |
| cg05897963 | 19  | 30157918  | S_Shore       | PLEKHF1      | 46.5348083  | 7.01E-05 | 0.031629 |
| cg08659179 | 5   | 27038707  | Other         | CDH9         | 76.3421162  | 7.04E-05 | 0.03168  |
| cg00620452 | 3   | 32147645  | N_Shore       | GPD1L        | 54.0359961  | 7.05E-05 | 0.03168  |
| cg01250001 | 8   | 103758088 | Other         | NA           | 23.7325835  | 7.07E-05 | 0.03168  |
| cg19590858 | 14  | 35009852  | S_Shore       | EAPP         | -63.712312  | 7.08E-05 | 0.03168  |
| cg07389611 | 17  | 59540267  | S_Shore       | TBX4         | -38.498093  | 7.09E-05 | 0.03168  |
| cg20674521 | 22  | 38850521  | N_Shore       | KCNJ4        | -45.422345  | 7.09E-05 | 0.03168  |
| cg06508867 | 16  | 87814178  | S_Shore       | NA           | -51.428365  | 7.11E-05 | 0.0317   |
| cg07631435 | 11  | 114043903 | Other         | ZBTB16       | -39.24105   | 7.15E-05 | 0.031813 |
| cg01479396 | 17  | 7529693   | N_Shore       | SAT2         | -58.714853  | 7.16E-05 | 0.031813 |
| cg21877005 | 1   | 109242103 | Other         | PRPF38B      | -63.566367  | 7.17E-05 | 0.031813 |
| cg15965716 | 1   | 164688315 | Other         | PBX1         | 27.5890228  | 7.18E-05 | 0.031839 |
| cg08952844 | 2   | 88313351  | N_Shelf       | NA           | -65.142176  | 7.22E-05 | 0.031945 |
| cg02671382 | 1   | 120457856 | Other         | NOTCH2       | 56.3286128  | 7.25E-05 | 0.031945 |
| cg23682913 | 1   | 2080710   | N_Shore       | PRKCZ        | -57.147849  | 7.25E-05 | 0.031945 |
| cg26360402 | 14  | 105973994 | Other         | NA           | -45.217354  | 7.25E-05 | 0.031945 |
| cg26154999 | 2   | 225266346 | Other         | FAM124B      | -38.387712  | 7.30E-05 | 0.032085 |
| cg13320202 | 3   | 63899097  | S_Shore       | ATXN7        | 41.5345289  | 7.35E-05 | 0.032233 |
| cg01991752 | 14  | 101014148 | S_Shore       | BEGAIN       | -44.892109  | 7.35E-05 | 0.032233 |
| cg01120874 | 9   | 133811816 | N_Shore       | FIBCD1       | -46.847704  | 7.37E-05 | 0.032274 |
| cg13279083 | 4   | 110128090 | Other         | COL25A1      | 42.0812039  | 7.39E-05 | 0.032294 |
| cg25864762 | 7   | 1850388   | Other         | NA           | 40.5682569  | 7.41E-05 | 0.032294 |
| cg13394491 | 5   | 15737401  | Other         | FBXL7        | 38.2214775  | 7.42E-05 | 0.032294 |
| cg26215869 | 14  | 73384273  | S_Shore       | NA           | -40.341832  | 7.44E-05 | 0.032294 |
| cg09307264 | 17  | 4902281   | Other         | KIF1C        | 46.3616466  | 7.44E-05 | 0.032294 |
| cg08802053 | 5   | 92932045  | S_Shore       | MIR548AO     | -51.181217  | 7.45E-05 | 0.032294 |
| cg11783014 | 6   | 149285854 | Other         | LOC100128176 | -81.318564  | 7.52E-05 | 0.032516 |
| cg02861504 | 1   | 207144367 | Other         | FCAMR        | -58.530548  | 7.53E-05 | 0.032516 |
| cg27294164 | 1   | 36585141  | Other         | NA           | 31.9216331  | 7.54E-05 | 0.032516 |
| cg10732094 | 19  | 45957466  | S_Shelf       | NA           | -52.801745  | 7.57E-05 | 0.032516 |

Supplemental Table 1. 2,573 BMI-Associated Methylation Sites in the Normal Breast Study, adjusting for age, race, and alcohol use

| Probe      | CHR | MAPINFO   | CPG Location* | Gene         | Coefficient | p-value  | q-value  |
|------------|-----|-----------|---------------|--------------|-------------|----------|----------|
| cg25524052 | 4   | 182795806 | Other         | NA           | -112.89824  | 7.58E-05 | 0.032516 |
| cg23530268 | 17  | 74925720  | Island        | MGAT5B       | -21.463283  | 7.59E-05 | 0.032516 |
| cg04681525 | 9   | 132145577 | N_Shelf       | NA           | -74.065212  | 7.59E-05 | 0.032516 |
| cg03342032 | 13  | 94725495  | Other         | GPC6         | 26.8940009  | 7.61E-05 | 0.032516 |
| cg26915370 | 7   | 134575524 | Other         | CALD1        | 24.3065454  | 7.61E-05 | 0.032516 |
| cg03857553 | 22  | 29976613  | N_Shore       | NIPSNAP1     | 25.2325714  | 7.62E-05 | 0.032516 |
| cg04086097 | 7   | 128580792 | S_Shelf       | IRF5         | -37.686708  | 7.67E-05 | 0.032516 |
| cg23501051 | 11  | 19736912  | S_Shore       | LOC100126784 | 24.2709533  | 7.69E-05 | 0.032516 |
| cg25975856 | 3   | 19930780  | Other         | EFHB         | 72.3396141  | 7.69E-05 | 0.032516 |
| cg26938118 | 18  | 56059556  | S_Shore       | NEDD4L       | 53.8428493  | 7.70E-05 | 0.032516 |
| cg21252523 | 7   | 27254071  | Other         | NA           | -58.265221  | 7.70E-05 | 0.032516 |
| cg07595602 | 1   | 240783371 | Other         | NA           | 35.2570463  | 7.72E-05 | 0.032516 |
| cg24902557 | 14  | 105715464 | Island        | BRF1         | 171.456873  | 7.73E-05 | 0.032516 |
| cg25983531 | 7   | 36765142  | Other         | AOAH         | -25.653265  | 7.73E-05 | 0.032516 |
| cg26889953 | 15  | 22915992  | Other         | CYFIP1       | -37.910105  | 7.73E-05 | 0.032516 |
| cg13819552 | 9   | 95799870  | Island        | NA           | -45.682571  | 7.74E-05 | 0.032516 |
| cg00258809 | 3   | 72704324  | Other         | NA           | 155.597744  | 7.74E-05 | 0.032516 |
| cg09580822 | 10  | 130834003 | Other         | NA           | -33.099405  | 7.77E-05 | 0.032572 |
| cg22694635 | 19  | 36362894  | N_Shelf       | APLP1        | -70.97253   | 7.78E-05 | 0.032572 |
| cg07031070 | 6   | 28543670  | Other         | SCAND3       | -64.503634  | 7.79E-05 | 0.032572 |
| cg09372486 | 19  | 31845489  | Island        | NA           | -52.593508  | 7.86E-05 | 0.032741 |
| cg03315764 | 1   | 29448425  | S_Shore       | TMEM200B     | 192.54359   | 7.86E-05 | 0.032741 |
| cg16217908 | 3   | 111809470 | S_Shelf       | C3orf52      | -29.026416  | 7.86E-05 | 0.032741 |
| cg13857210 | 9   | 138999217 | Other         | NA           | -39.697262  | 7.88E-05 | 0.032754 |
| cg05654164 | 1   | 85725892  | S_Shore       | C1orf52      | 39.3789643  | 7.89E-05 | 0.032767 |
| cg17050616 | 22  | 50585229  | Other         | MOV10L1      | 36.3899892  | 7.92E-05 | 0.032825 |
| cg10763594 | 2   | 218258333 | Other         | DIRC3        | 24.8140147  | 7.93E-05 | 0.032825 |
| cg05212260 | 17  | 39791766  | Other         | KRT42P       | 38.5443991  | 7.97E-05 | 0.032902 |
| cg15417654 | 3   | 187959138 | Other         | LPP          | 46.5239465  | 7.98E-05 | 0.032902 |
| cg14515803 | 14  | 100120874 | S_Shore       | HHIPL1       | 22.4873971  | 8.01E-05 | 0.032902 |
| cg04718447 | 16  | 85518989  | N_Shore       | NA           | -54.464757  | 8.02E-05 | 0.032902 |
| cg22787468 | 17  | 27309113  | N_Shelf       | SEZ6         | -77.08763   | 8.04E-05 | 0.032902 |
| cg04467549 | 17  | 79921715  | S_Shore       | NOTUM        | -67.416943  | 8.05E-05 | 0.032902 |
| cg23517605 | 6   | 3228365   | Island        | TUBB2B       | 67.7430148  | 8.06E-05 | 0.032902 |
| cg14188712 | 13  | 31942544  | Other         | NA           | -69.50033   | 8.07E-05 | 0.032902 |
| cg03838168 | X   | 48433876  | S_Shore       | RBM3         | 73.8164192  | 8.09E-05 | 0.032902 |
| cg00471059 | 5   | 179562620 | N_Shore       | RASGEF1C     | -96.146568  | 8.12E-05 | 0.032902 |
| cg22609908 | 12  | 858759    | N_Shelf       | WNK1         | -27.746081  | 8.12E-05 | 0.032902 |
| cg17675088 | 5   | 93013224  | Other         | FAM172A      | 30.134072   | 8.13E-05 | 0.032902 |
| cg26258213 | 10  | 127220321 | Other         | NA           | 25.248022   | 8.13E-05 | 0.032902 |
| cg04913246 | 14  | 99658630  | Other         | BCL11B       | 113.37688   | 8.13E-05 | 0.032902 |

Supplemental Table 1. 2,573 BMI-Associated Methylation Sites in the Normal Breast Study, adjusting for age, race, and alcohol use

| Probe      | CHR | MAPINFO   | CPG Location* | Gene      | Coefficient | p-value  | q-value  |
|------------|-----|-----------|---------------|-----------|-------------|----------|----------|
| cg13725803 | 13  | 51640297  | Other         | GUCY1B2   | -71.12688   | 8.14E-05 | 0.032902 |
| cg03841081 | 3   | 150967799 | Other         | P2RY14    | -73.753135  | 8.14E-05 | 0.032902 |
| cg16706749 | 15  | 74222816  | S_Shelf       | LOXL1-AS1 | 54.460569   | 8.16E-05 | 0.032938 |
| cg26158133 | 5   | 72824251  | Other         | NA        | -23.602323  | 8.17E-05 | 0.032944 |
| cg19186380 | 12  | 54427029  | Island        | HOXC5     | 48.1303627  | 8.19E-05 | 0.032966 |
| cg17975379 | 6   | 4893429   | Other         | CDYL      | -50.88186   | 8.23E-05 | 0.03306  |
| cg26371957 | 12  | 739280    | Other         | NINJ2     | -18.039461  | 8.24E-05 | 0.03306  |
| cg27306802 | 1   | 3510561   | N_Shore       | MEGF6     | -26.420823  | 8.26E-05 | 0.033097 |
| cg01921323 | 7   | 153881192 | Other         | DPP6      | 40.3956678  | 8.27E-05 | 0.033097 |
| cg05752118 | 11  | 2920564   | N_Shelf       | SLC22A18  | -73.539099  | 8.29E-05 | 0.033115 |
| cg18479249 | 6   | 19180718  | Other         | NA        | 34.8260925  | 8.37E-05 | 0.033393 |
| cg14371731 | 10  | 81003175  | Island        | ZMIZ1     | 55.4803042  | 8.39E-05 | 0.033393 |
| cg07051833 | 12  | 93808395  | Other         | UBE2N     | -41.27514   | 8.40E-05 | 0.033393 |
| cg24872300 | 19  | 607586    | N_Shelf       | HCN2      | -52.246005  | 8.41E-05 | 0.033393 |
| cg01102073 | 3   | 128204813 | N_Shore       | GATA2     | 49.4328299  | 8.42E-05 | 0.033393 |
| cg06958766 | 14  | 76446087  | N_Shelf       | TGFB3     | 27.8073681  | 8.43E-05 | 0.033393 |
| cg18809126 | 3   | 11623526  | Other         | VGLL4     | 36.8765817  | 8.44E-05 | 0.033393 |
| cg25228625 | 17  | 8127373   | S_Shore       | LINC00324 | 37.3384812  | 8.48E-05 | 0.033525 |
| cg25600256 | 4   | 127837396 | Other         | NA        | 75.18206    | 8.50E-05 | 0.033527 |
| cg10154597 | 10  | 134910271 | N_Shore       | GPR123    | 26.9039602  | 8.51E-05 | 0.033538 |
| cg14688905 | 12  | 51403056  | Other         | SLC11A2   | -64.274549  | 8.56E-05 | 0.033542 |
| cg23013850 | 2   | 225266304 | Other         | FAM124B   | -33.557425  | 8.58E-05 | 0.033542 |
| cg02083676 | 3   | 127311156 | S_Shore       | TPRA1     | -66.328298  | 8.59E-05 | 0.033542 |
| cg11147094 | 15  | 88420438  | Other         | NTRK3     | -97.948871  | 8.61E-05 | 0.033542 |
| cg07699546 | 1   | 201790194 | Other         | NAV1      | -45.073037  | 8.62E-05 | 0.033542 |
| cg13826666 | 9   | 136600241 | Other         | SARDH     | -52.614807  | 8.63E-05 | 0.033542 |
| cg11569159 | 12  | 115172959 | N_Shore       | NA        | -38.318404  | 8.64E-05 | 0.033542 |
| cg20379671 | 22  | 39320879  | N_Shelf       | NA        | 31.7452641  | 8.66E-05 | 0.033542 |
| cg17974247 | 18  | 77336267  | Island        | NA        | 25.0998935  | 8.67E-05 | 0.033542 |
| cg12158889 | 2   | 84663044  | Other         | SUCLG1    | 66.0096053  | 8.68E-05 | 0.033542 |
| cg09424308 | 4   | 7046094   | N_Shore       | TADA2B    | 39.371053   | 8.69E-05 | 0.033542 |
| cg04267345 | 14  | 24835104  | S_Shore       | NFATC4    | 393.208264  | 8.69E-05 | 0.033542 |
| cg25432518 | 7   | 1894300   | N_Shore       | MAD1L1    | -68.344806  | 8.69E-05 | 0.033542 |
| cg18624544 | 14  | 21567646  | Other         | ZNF219    | 25.0347996  | 8.72E-05 | 0.033542 |
| cg06690535 | 3   | 196352142 | S_Shore       | NA        | -41.699824  | 8.72E-05 | 0.033542 |
| cg14015015 | 6   | 35327915  | Island        | PPARD     | 38.5258715  | 8.73E-05 | 0.033542 |
| cg12378878 | 13  | 50700606  | Other         | DLEU2     | -41.39821   | 8.73E-05 | 0.033542 |
| cg05533539 | 17  | 44104521  | Other         | MAPT      | -54.344552  | 8.74E-05 | 0.033542 |
| cg21734175 | 12  | 121107042 | Other         | NA        | 34.462829   | 8.76E-05 | 0.033542 |
| cg02169391 | 7   | 130126176 | Island        | MEST      | -43.977257  | 8.77E-05 | 0.033542 |
| cg25520910 | 2   | 114576197 | Other         | NA        | 33.3861772  | 8.77E-05 | 0.033542 |

Supplemental Table 1. 2,573 BMI-Associated Methylation Sites in the Normal Breast Study, adjusting for age, race, and alcohol use

| Probe      | CHR | MAPINFO   | CPG Location* | Gene       | Coefficient | p-value  | q-value  |
|------------|-----|-----------|---------------|------------|-------------|----------|----------|
| cg20098854 | 8   | 898407    | Other         | ERICH1-AS1 | -39.50208   | 8.81E-05 | 0.033542 |
| cg10825315 | 14  | 81425912  | Other         | TSHR       | -42.255061  | 8.81E-05 | 0.033542 |
| cg08564172 | 5   | 73833812  | Other         | NA         | -21.557534  | 8.82E-05 | 0.033542 |
| cg26488183 | 15  | 75195105  | Other         | FAM219B    | -70.700112  | 8.83E-05 | 0.033542 |
| cg02497428 | 16  | 21665138  | N_Shelf       | IGSF6      | -48.433892  | 8.83E-05 | 0.033542 |
| cg07571344 | 20  | 1472071   | Other         | SIRPB2     | -37.774985  | 8.84E-05 | 0.033542 |
| cg24425149 | 13  | 75991251  | Other         | TBC1D4     | -36.797714  | 8.85E-05 | 0.033542 |
| cg05714729 | 18  | 33234096  | Other         | GALNT1     | -58.523541  | 8.86E-05 | 0.033557 |
| cg07276534 | 3   | 193534580 | Other         | NA         | 36.6406005  | 8.88E-05 | 0.033575 |
| cg11870455 | 3   | 187491295 | Other         | NA         | -40.326649  | 8.94E-05 | 0.033744 |
| cg07617207 | 2   | 161920006 | Other         | NA         | 31.8778341  | 8.95E-05 | 0.033744 |
| cg24782497 | 19  | 18385409  | Other         | KIAA1683   | -65.480982  | 8.96E-05 | 0.033744 |
| cg05494008 | 8   | 145579285 | S_Shore       | TMEM249    | -63.748505  | 8.98E-05 | 0.033761 |
| cg15739581 | 2   | 166626783 | Other         | GALNT3     | -73.61659   | 9.00E-05 | 0.033789 |
| cg11795276 | 12  | 54454252  | Island        | FLJ12825   | -35.226367  | 9.02E-05 | 0.033802 |
| cg22904401 | 5   | 92947872  | Other         | MIR548AO   | 55.6556199  | 9.03E-05 | 0.033802 |
| cg23668195 | 2   | 62805851  | Island        | NA         | 21.0358551  | 9.05E-05 | 0.033802 |
| cg23476456 | X   | 110039192 | Other         | CHRD1      | 73.376642   | 9.05E-05 | 0.033802 |
| cg04179148 | 14  | 94858339  | Other         | SERPINA1   | -69.929787  | 9.07E-05 | 0.033802 |
| cg23850913 | 6   | 15505452  | Other         | JARID2     | 47.6544231  | 9.07E-05 | 0.033802 |
| cg14510967 | 11  | 2321803   | Other         | C11orf21   | -54.039621  | 9.08E-05 | 0.033807 |
| cg18343862 | 11  | 10590003  | Other         | LYVE1      | -59.827923  | 9.10E-05 | 0.033807 |
| cg24607398 | 3   | 37033625  | N_Shore       | EPM2AIP1   | 31.1669106  | 9.12E-05 | 0.033844 |
| cg18046677 | 19  | 49220142  | N_Shelf       | MAMSTR     | 36.1283756  | 9.13E-05 | 0.033844 |
| cg14138312 | 9   | 6869699   | Other         | KDM4C      | -141.79004  | 9.14E-05 | 0.033844 |
| cg02863169 | 2   | 45173548  | S_Shore       | SIX3       | -92.945938  | 9.16E-05 | 0.033873 |
| cg11300147 | 12  | 7596703   | S_Shelf       | CD163L1    | -25.391148  | 9.21E-05 | 0.034018 |
| cg10283690 | 1   | 245027135 | Other         | HNRNPU     | 1783.47743  | 9.25E-05 | 0.034018 |
| cg19716542 | 1   | 52302074  | Island        | MIR761     | -235.06378  | 9.25E-05 | 0.034018 |
| cg09197279 | 2   | 196966508 | Other         | NA         | 42.9359074  | 9.25E-05 | 0.034018 |
| cg09683440 | 16  | 83869927  | Other         | NA         | -22.726224  | 9.27E-05 | 0.034018 |
| cg12081303 | 1   | 161039681 | Other         | ARHGAP30   | -59.154257  | 9.27E-05 | 0.034018 |
| cg01416295 | 1   | 156710278 | N_Shore       | MRPL24     | 172.927057  | 9.31E-05 | 0.034093 |
| cg18662080 | 13  | 29057716  | Other         | FLT1       | 41.0362205  | 9.32E-05 | 0.034093 |
| cg12080566 | 2   | 75798232  | Other         | EVA1A      | 68.6758207  | 9.38E-05 | 0.034275 |
| cg19832184 | 20  | 33578069  | Other         | MIR499A    | -107.77107  | 9.47E-05 | 0.034435 |
| cg21910709 | 5   | 893665    | S_Shore       | TRIP13     | 35.5168239  | 9.48E-05 | 0.034435 |
| cg11697038 | 1   | 27931284  | S_Shore       | AHDC1      | 41.9695138  | 9.48E-05 | 0.034435 |
| cg06389605 | 6   | 168147420 | Other         | NA         | -95.764787  | 9.49E-05 | 0.034435 |
| cg09976669 | 11  | 9738663   | Other         | SWAP70     | -25.628965  | 9.49E-05 | 0.034435 |
| cg24361808 | 22  | 46477834  | Other         | MIRLET7BHG | 47.4950723  | 9.51E-05 | 0.034435 |

Supplemental Table 1. 2,573 BMI-Associated Methylation Sites in the Normal Breast Study, adjusting for age, race, and alcohol use

| Probe      | CHR | MAPINFO   | CPG Location* | Gene      | Coefficient | p-value  | q-value  |
|------------|-----|-----------|---------------|-----------|-------------|----------|----------|
| cg09076077 | 20  | 58630315  | N_Shelf       | C20orf197 | -49.71534   | 9.51E-05 | 0.034435 |
| cg07517739 | 10  | 132364391 | N_Shore       | NA        | 24.2072669  | 9.52E-05 | 0.034435 |
| cg25487405 | 22  | 46473039  | Other         | NA        | 39.9093948  | 9.54E-05 | 0.034451 |
| cg01636910 | 1   | 85740751  | N_Shore       | LOC646626 | -22.199594  | 9.57E-05 | 0.034507 |
| cg12646804 | 5   | 2008188   | Island        | NA        | 37.6301463  | 9.62E-05 | 0.034637 |
| cg19998150 | 10  | 14051838  | Other         | FRMD4A    | 50.3309934  | 9.63E-05 | 0.034637 |
| cg03977385 | 16  | 48468609  | Other         | NA        | -35.091972  | 9.65E-05 | 0.034637 |
| cg23379806 | 10  | 14650660  | S_Shelf       | FAM107B   | -53.741082  | 9.65E-05 | 0.034637 |
| cg02217815 | 22  | 36890079  | N_Shelf       | FOXRED2   | -37.202019  | 9.67E-05 | 0.034641 |
| cg08354401 | 5   | 177824353 | S_Shore       | COL23A1   | 48.8848468  | 9.69E-05 | 0.034661 |
| cg20316779 | 1   | 225997649 | Island        | EPHX1     | 696.426105  | 9.70E-05 | 0.034661 |
| cg12926693 | 6   | 36665611  | Other         | RAB44     | -50.239058  | 9.72E-05 | 0.034661 |
| cg26863600 | 19  | 2616921   | S_Shelf       | GNG7      | -25.101339  | 9.72E-05 | 0.034661 |
| cg07431973 | 14  | 52142383  | Other         | FRMD6     | 30.2567186  | 9.78E-05 | 0.03476  |
| cg24087669 | 5   | 5419515   | N_Shelf       | KIAA0947  | 43.6001495  | 9.79E-05 | 0.03476  |
| cg13134916 | 12  | 25707564  | Other         | IFLTD1    | -58.895813  | 9.80E-05 | 0.03476  |
| cg22325580 | 8   | 1899943   | Other         | ARHGEF10  | -71.317349  | 9.81E-05 | 0.03476  |
| cg08433504 | 15  | 39872071  | N_Shore       | THBS1     | 57.7380633  | 9.84E-05 | 0.03476  |
| cg03389926 | 2   | 42651266  | Other         | NA        | 26.4210082  | 9.85E-05 | 0.03476  |
| cg14527344 | 6   | 28554680  | N_Shore       | SCAND3    | 48.4684153  | 9.85E-05 | 0.03476  |
| cg01117339 | 11  | 73737124  | Other         | NA        | -50.916874  | 9.86E-05 | 0.03476  |
| cg03891346 | 11  | 121970725 | Other         | MIR125B1  | 25.187608   | 9.91E-05 | 0.03476  |
| cg19925518 | 10  | 90851787  | Other         | NA        | -26.374363  | 9.91E-05 | 0.03476  |
| cg08817540 | 3   | 108020727 | Other         | HHLA2     | -28.44846   | 9.92E-05 | 0.03476  |
| cg25226226 | 17  | 47591494  | S_Shore       | NGFR      | 55.4557266  | 9.93E-05 | 0.03476  |
| cg27542466 | 15  | 90728004  | Island        | SEMA4B    | 58.0214643  | 9.93E-05 | 0.03476  |
| cg25569396 | 6   | 11382769  | N_Shelf       | NEDD9     | -48.025083  | 9.95E-05 | 0.03476  |
| cg13338454 | 4   | 77659228  | Other         | SHROOM3   | 23.8713762  | 9.95E-05 | 0.03476  |
| cg11882304 | 5   | 159456907 | Other         | TTC1      | 46.0647185  | 9.96E-05 | 0.03476  |
| cg24089887 | 13  | 74899532  | Other         | NA        | 33.9341291  | 9.96E-05 | 0.03476  |
| cg14909495 | 7   | 150549472 | Other         | AOC1      | -57.459481  | 9.98E-05 | 0.034789 |
| cg06059409 | 11  | 73036247  | Other         | ARHGEF17  | 46.3570849  | 0.0001   | 0.03482  |
| cg00504782 | 1   | 111037272 | Other         | NA        | -44.015169  | 0.0001   | 0.03482  |
| cg05667818 | 7   | 116786870 | Other         | ST7-AS2   | -58.940947  | 0.0001   | 0.03482  |
| cg06898214 | 22  | 50585400  | Other         | MOV10L1   | 24.3805404  | 0.0001   | 0.03482  |
| cg02691685 | 19  | 55851042  | Island        | SUV420H2  | 2330.87376  | 0.000101 | 0.03482  |
| cg19801705 | 5   | 180542156 | Island        | NA        | 187.469554  | 0.000101 | 0.034849 |
| cg15953461 | 14  | 77489763  | N_Shelf       | NA        | 33.9270599  | 0.000101 | 0.034977 |
| cg04233230 | 1   | 155910958 | Other         | RXFP4     | -68.905369  | 0.000101 | 0.034977 |
| cg13039082 | 11  | 77123331  | S_Shore       | PAK1      | 32.903257   | 0.000101 | 0.034977 |
| cg00107982 | 22  | 37813098  | N_Shelf       | ELFN2     | -21.073564  | 0.000102 | 0.035008 |

Supplemental Table 1. 2,573 BMI-Associated Methylation Sites in the Normal Breast Study, adjusting for age, race, and alcohol use

| Probe      | CHR | MAPINFO   | CPG Location* | Gene     | Coefficient | p-value  | q-value  |
|------------|-----|-----------|---------------|----------|-------------|----------|----------|
| cg00283535 | 8   | 124749564 | Other         | ANXA13   | 35.4200659  | 0.000102 | 0.035032 |
| cg04206724 | 16  | 11027999  | Other         | DEXI     | -181.93937  | 0.000102 | 0.035044 |
| cg03739609 | 6   | 31555016  | Other         | LST1     | -66.050958  | 0.000103 | 0.035207 |
| cg05499338 | 16  | 81517665  | Other         | CMIP     | -109.68633  | 0.000103 | 0.035209 |
| cg15358372 | 10  | 71108752  | Other         | HK1      | -26.764387  | 0.000103 | 0.035209 |
| cg08550394 | 16  | 4013659   | N_Shore       | ADCY9    | -44.019239  | 0.000103 | 0.035215 |
| cg08914797 | 11  | 126870648 | S_Shore       | KIRREL3  | 339.810539  | 0.000103 | 0.03524  |
| cg13019306 | 5   | 145155873 | Other         | PRELID2  | 32.0750866  | 0.000103 | 0.03524  |
| cg20927119 | 7   | 149999961 | Other         | ACTR3C   | -42.243886  | 0.000104 | 0.03538  |
| cg00453717 | 11  | 74344629  | Other         | POLD3    | -105.75305  | 0.000104 | 0.03538  |
| cg13594542 | 9   | 138850547 | N_Shelf       | UBAC1    | -57.713815  | 0.000104 | 0.03538  |
| cg03398002 | 1   | 15272082  | Other         | KAZN     | 28.527693   | 0.000104 | 0.035387 |
| cg10959668 | 3   | 195897912 | Other         | NA       | -60.239882  | 0.000104 | 0.035406 |
| cg20701531 | 2   | 121583695 | Other         | GLI2     | 41.4583759  | 0.000105 | 0.035416 |
| cg26124860 | 3   | 42918681  | N_Shelf       | CYP8B1   | -95.725824  | 0.000105 | 0.035458 |
| cg10871721 | 21  | 46235052  | N_Shore       | SUMO3    | -52.325995  | 0.000105 | 0.035458 |
| cg15234627 | 13  | 33837178  | Other         | STARD13  | -55.530336  | 0.000105 | 0.035517 |
| cg02026204 | 22  | 30663007  | Other         | OSM      | -39.5961    | 0.000105 | 0.035517 |
| cg13247967 | 11  | 123487358 | Other         | GRAMD1B  | 30.3175452  | 0.000106 | 0.035583 |
| cg14779327 | 7   | 137931748 | Other         | NA       | 70.8591819  | 0.000106 | 0.035583 |
| cg13705284 | 3   | 58523313  | Other         | ACOX2    | 31.5210196  | 0.000106 | 0.035583 |
| cg16734981 | 11  | 109259766 | Other         | NA       | -21.775644  | 0.000106 | 0.035583 |
| cg25210609 | 1   | 19642293  | S_Shelf       | PQLC2    | -71.228787  | 0.000106 | 0.035592 |
| cg17074396 | 22  | 49843754  | Island        | NA       | 85.5220637  | 0.000106 | 0.035592 |
| cg04972244 | 16  | 57117433  | Other         | NLRC5    | -73.498873  | 0.000107 | 0.035636 |
| cg21616142 | 22  | 28076037  | S_Shore       | NA       | -71.384744  | 0.000107 | 0.035636 |
| cg04890406 | 3   | 48647370  | Island        | UQCRC1   | 126.639211  | 0.000107 | 0.035636 |
| cg05923857 | 10  | 114911615 | Other         | TCF7L2   | -41.246371  | 0.000107 | 0.035636 |
| cg24674220 | 20  | 62251901  | Other         | GMEB2    | 80.4512236  | 0.000107 | 0.035636 |
| cg09999348 | 2   | 46398848  | Other         | PRKCE    | 45.01666    | 0.000107 | 0.035657 |
| cg15806306 | 11  | 2893385   | S_Shelf       | KCNQ1DN  | -50.646315  | 0.000108 | 0.035657 |
| cg26053480 | 7   | 25898758  | Island        | NA       | -45.618353  | 0.000108 | 0.035661 |
| cg03277819 | 12  | 772529    | Other         | NINJ2    | 25.9606594  | 0.000108 | 0.035661 |
| cg08310008 | 12  | 52836644  | Other         | NA       | 54.3573269  | 0.000108 | 0.035661 |
| cg02978220 | 1   | 108337960 | Other         | VAV3     | -83.830841  | 0.000108 | 0.035748 |
| cg02935298 | 22  | 43036734  | Other         | ATP5L2   | -62.602526  | 0.000108 | 0.035748 |
| cg26363555 | 11  | 121973044 | Other         | MIR125B1 | 27.8239643  | 0.000109 | 0.035748 |
| cg03313654 | 16  | 863510    | Island        | PRR25    | 128.999295  | 0.000109 | 0.035771 |
| cg10277646 | 2   | 129079038 | N_Shore       | HS6ST1   | -98.595096  | 0.000109 | 0.035848 |
| cg24149590 | 14  | 75867231  | Other         | NA       | -47.156104  | 0.000109 | 0.035848 |
| cg09146459 | 6   | 32921200  | Other         | HLA-DMA  | -31.138757  | 0.00011  | 0.035976 |

Supplemental Table 1. 2,573 BMI-Associated Methylation Sites in the Normal Breast Study, adjusting for age, race, and alcohol use

| Probe      | CHR | MAPINFO   | CPG Location* | Gene         | Coefficient | p-value  | q-value  |
|------------|-----|-----------|---------------|--------------|-------------|----------|----------|
| cg06218186 | 7   | 99691644  | Other         | MIR106B      | 50.059469   | 0.00011  | 0.036016 |
| cg26545040 | 19  | 994110    | Island        | WDR18        | 36.4884825  | 0.00011  | 0.036016 |
| cg23666844 | 7   | 151137882 | S_Shore       | CRYGN        | 67.0033818  | 0.00011  | 0.036016 |
| cg16302816 | 11  | 16834800  | Other         | PLEKHA7      | -50.71777   | 0.00011  | 0.036016 |
| cg19760965 | 3   | 194868843 | Other         | XXYL1-AS2    | -58.178134  | 0.000111 | 0.036016 |
| cg10781468 | 6   | 168778312 | Other         | NA           | 36.7370265  | 0.000111 | 0.036016 |
| cg04381249 | 20  | 61404888  | S_Shore       | LINC00659    | 36.4940906  | 0.000111 | 0.036016 |
| cg16129800 | 11  | 2920414   | N_Shelf       | SLC22A18     | -55.755084  | 0.000111 | 0.036016 |
| cg24475272 | 4   | 140432613 | Other         | SETD7        | -34.791161  | 0.000111 | 0.036073 |
| cg20271057 | 3   | 16974160  | Other         | PLCL2        | -56.892105  | 0.000111 | 0.036073 |
| cg05619785 | 6   | 32078574  | Other         | TNXB         | 31.7331115  | 0.000112 | 0.036073 |
| cg00343906 | 1   | 1696692   | Other         | NADK         | -94.810816  | 0.000112 | 0.036073 |
| cg17828057 | 8   | 42037527  | Other         | PLAT         | -45.482398  | 0.000112 | 0.036073 |
| cg17182817 | 10  | 112624555 | Other         | NA           | -25.255219  | 0.000112 | 0.036073 |
| cg07684519 | 12  | 29303184  | S_Shore       | FAR2         | -65.921056  | 0.000112 | 0.036083 |
| cg23787937 | 12  | 29303160  | S_Shore       | FAR2         | -48.959565  | 0.000112 | 0.036083 |
| cg08160072 | 2   | 40009501  | S_Shelf       | THUMPD2      | -43.90711   | 0.000112 | 0.036107 |
| cg11141696 | 1   | 161700167 | S_Shelf       | NA           | -39.670847  | 0.000113 | 0.036111 |
| cg19947463 | 7   | 1113237   | Other         | C7orf50      | -31.873447  | 0.000113 | 0.036111 |
| cg14613786 | 18  | 48255506  | N_Shore       | MAPK4        | -71.9563    | 0.000113 | 0.036111 |
| cg24394336 | 1   | 17962705  | Other         | ARHGEF10L    | -55.827939  | 0.000113 | 0.036111 |
| cg12929160 | 13  | 77030645  | Other         | NA           | -43.050911  | 0.000113 | 0.036111 |
| cg18710162 | 17  | 33390808  | Other         | RFFL         | -30.286724  | 0.000113 | 0.036111 |
| cg12666279 | 2   | 115918745 | Island        | LOC389023    | -197.78485  | 0.000113 | 0.036111 |
| cg09289820 | 6   | 30421275  | S_Shore       | NA           | -49.957179  | 0.000114 | 0.036111 |
| cg07046426 | 2   | 237623903 | Other         | NA           | -26.985795  | 0.000114 | 0.036111 |
| cg12049550 | 1   | 65035261  | Other         | CACHD1       | -65.52271   | 0.000114 | 0.036111 |
| cg00790255 | 3   | 194032074 | N_Shore       | LINC00887    | 54.8151327  | 0.000114 | 0.036111 |
| cg13577075 | 12  | 123444414 | Island        | ABCB9        | -233.52292  | 0.000114 | 0.036111 |
| cg10087754 | 7   | 2678263   | Other         | TTYH3        | 49.1087127  | 0.000114 | 0.036111 |
| cg12661092 | 10  | 98861029  | Other         | LOC100505540 | -78.296898  | 0.000114 | 0.036111 |
| cg02574844 | 11  | 5959923   | Other         | NA           | -23.482396  | 0.000115 | 0.036111 |
| cg26830558 | 11  | 69874845  | Other         | NA           | -69.012047  | 0.000115 | 0.036111 |
| cg17012513 | X   | 2984799   | Other         | ARSF         | 42.9626112  | 0.000115 | 0.036111 |
| cg00975624 | 3   | 159646501 | Other         | NA           | -45.009511  | 0.000115 | 0.036111 |
| cg17869960 | 6   | 12718530  | Other         | PHACTR1      | 21.8937914  | 0.000115 | 0.036111 |
| cg18320356 | 12  | 10103812  | Other         | CLEC12A      | -38.175875  | 0.000115 | 0.036111 |
| cg10405075 | 16  | 79463964  | Other         | NA           | 33.9239141  | 0.000115 | 0.036213 |
| cg03116466 | 7   | 2116512   | Island        | MAD1L1       | -73.237459  | 0.000116 | 0.036213 |
| cg12751042 | 12  | 12874288  | N_Shelf       | CDKN1B       | -24.518337  | 0.000116 | 0.036213 |
| cg14347914 | 9   | 96706239  | N_Shore       | NA           | -51.032596  | 0.000116 | 0.036252 |

Supplemental Table 1. 2,573 BMI-Associated Methylation Sites in the Normal Breast Study, adjusting for age, race, and alcohol use

| Probe      | CHR | MAPINFO   | CPG Location* | Gene      | Coefficient | p-value  | q-value  |
|------------|-----|-----------|---------------|-----------|-------------|----------|----------|
| cg02713951 | 22  | 46516291  | N_Shelf       | NA        | 42.2330575  | 0.000116 | 0.036252 |
| cg02224021 | 19  | 836716    | Island        | PRTN3     | -54.414551  | 0.000116 | 0.036258 |
| cg00644351 | 10  | 121271840 | Other         | RGS10     | -42.41105   | 0.000116 | 0.036272 |
| cg07984358 | 10  | 24704829  | Other         | KIAA1217  | 37.2018693  | 0.000117 | 0.036331 |
| cg10783294 | 12  | 679668    | S_Shore       | NINJ2     | 49.231977   | 0.000117 | 0.036331 |
| cg27009704 | 5   | 118367693 | Other         | NA        | -87.451279  | 0.000117 | 0.036346 |
| cg15414034 | 19  | 10196462  | N_Shore       | C19orf66  | 45.8706389  | 0.000117 | 0.036352 |
| cg03924115 | 9   | 133768966 | Other         | QRFP      | -40.678045  | 0.000118 | 0.036352 |
| cg02874658 | 12  | 52265308  | S_Shelf       | NA        | -110.51566  | 0.000118 | 0.036352 |
| cg07207490 | 11  | 118492463 | Other         | PHLDB1    | 21.871396   | 0.000118 | 0.036352 |
| cg03190661 | 17  | 76126702  | N_Shore       | TMC8      | -29.592845  | 0.000118 | 0.036352 |
| cg26769927 | 16  | 29674972  | N_Shore       | SPN       | -66.914924  | 0.000118 | 0.036352 |
| cg26100303 | 3   | 114099712 | Other         | ZBTB20    | 30.3427039  | 0.000118 | 0.036352 |
| cg14734668 | 10  | 20864693  | Other         | NA        | -33.279717  | 0.000118 | 0.036368 |
| cg21240684 | 2   | 3526841   | S_Shelf       | ADI1      | 40.7266147  | 0.000119 | 0.036501 |
| cg06663317 | 16  | 56641101  | N_Shore       | MT2A      | 47.5913592  | 0.000119 | 0.036522 |
| cg23139609 | 6   | 105901342 | Other         | NA        | -31.067267  | 0.000119 | 0.036522 |
| cg02993722 | 1   | 6698457   | Other         | DNAJC11   | 37.118625   | 0.00012  | 0.036608 |
| cg04337358 | 14  | 98489522  | Other         | NA        | -25.819636  | 0.00012  | 0.036608 |
| cg10132694 | 19  | 54876752  | Other         | LAIR1     | -41.483408  | 0.00012  | 0.03665  |
| cg11772801 | 14  | 51711237  | S_Shelf       | TMX1      | -56.677781  | 0.00012  | 0.036798 |
| cg05689208 | 8   | 49496391  | Other         | NA        | 41.5934639  | 0.000121 | 0.036806 |
| cg06495586 | 4   | 54424787  | Other         | LNX1      | -27.864367  | 0.000121 | 0.036806 |
| cg05874270 | 1   | 2559893   | Island        | MMEL1     | 56.8259177  | 0.000121 | 0.036836 |
| cg07114627 | 1   | 110155839 | Other         | GNAT2     | -57.999658  | 0.000121 | 0.036836 |
| cg17973038 | 8   | 99395068  | Other         | NA        | 44.2566207  | 0.000121 | 0.036836 |
| cg24691042 | 5   | 171708977 | N_Shore       | UBTD2     | 23.8401753  | 0.000121 | 0.036836 |
| cg16813662 | 13  | 100650387 | Island        | NA        | -49.963586  | 0.000122 | 0.036836 |
| cg00353571 | 19  | 49238653  | Island        | RASIP1    | 52.9874685  | 0.000122 | 0.036836 |
| cg06789856 | 17  | 77133777  | N_Shore       | RBFOX3    | 36.4597206  | 0.000122 | 0.036836 |
| cg05568930 | 11  | 75522399  | N_Shelf       | UVRAG     | -62.080045  | 0.000122 | 0.036836 |
| cg21870662 | 17  | 2241570   | S_Shore       | SGSM2     | 92.8148716  | 0.000122 | 0.036836 |
| cg20706196 | 1   | 109242775 | Other         | PRPF38B   | -35.007657  | 0.000122 | 0.036836 |
| cg10512278 | 16  | 68027839  | S_Shore       | DPEP2     | -65.628038  | 0.000123 | 0.036836 |
| cg12004276 | 11  | 33913586  | Other         | LMO2      | -65.944145  | 0.000123 | 0.036836 |
| cg06335008 | 2   | 99552109  | N_Shore       | KIAA1211L | 103.513434  | 0.000123 | 0.036836 |
| cg13071185 | 11  | 860134    | S_Shore       | TSPAN4    | 27.3888583  | 0.000123 | 0.036836 |
| cg14502319 | 12  | 125167409 | Other         | NA        | -60.831098  | 0.000123 | 0.036836 |
| cg15432485 | 12  | 2039878   | Other         | LINC00940 | -59.281428  | 0.000123 | 0.036836 |
| cg01585860 | 6   | 75922610  | Other         | NA        | -60.123925  | 0.000123 | 0.036836 |
| cg20897136 | 10  | 74034667  | Island        | DDIT4     | 53.321931   | 0.000124 | 0.036836 |

Supplemental Table 1. 2,573 BMI-Associated Methylation Sites in the Normal Breast Study, adjusting for age, race, and alcohol use

| Probe      | CHR | MAPINFO   | CPG Location* | Gene         | Coefficient | p-value  | q-value  |
|------------|-----|-----------|---------------|--------------|-------------|----------|----------|
| cg07993586 | 7   | 157204960 | N_Shore       | DNAJB6       | -157.40371  | 0.000124 | 0.036836 |
| cg22148297 | 13  | 99910587  | Other         | GPR18        | -43.319798  | 0.000124 | 0.036836 |
| cg23526586 | 12  | 105917092 | Other         | NA           | 31.0573492  | 0.000124 | 0.036836 |
| cg27285720 | 1   | 89664782  | Other         | GBP4         | -21.503248  | 0.000124 | 0.036836 |
| cg13149147 | 2   | 105757726 | N_Shelf       | NA           | -52.304203  | 0.000125 | 0.036836 |
| cg11691844 | 11  | 85460604  | Other         | SYTL2        | -53.925419  | 0.000125 | 0.036836 |
| cg15600966 | 6   | 31602257  | S_Shelf       | PRRC2A       | 89.9317886  | 0.000125 | 0.036836 |
| cg15605124 | 1   | 3230250   | Other         | PRDM16       | 37.7753923  | 0.000125 | 0.036836 |
| cg08993690 | 4   | 124621838 | Other         | LOC285419    | 26.6986967  | 0.000125 | 0.036836 |
| cg09603024 | 20  | 48599292  | Island        | SNAI1        | 176.655841  | 0.000125 | 0.036836 |
| cg07310671 | 16  | 85253980  | Other         | NA           | 40.1757675  | 0.000125 | 0.036836 |
| cg14271729 | 14  | 57858383  | S_Shore       | NAA30        | 56.3716642  | 0.000125 | 0.036836 |
| cg14772955 | 1   | 36024404  | S_Shore       | NCDN         | 61.7341574  | 0.000125 | 0.036836 |
| cg24034453 | 17  | 17597825  | Island        | RAI1         | 170.999378  | 0.000125 | 0.036836 |
| cg27452278 | 8   | 102178508 | Other         | NA           | -84.528488  | 0.000126 | 0.036836 |
| cg02395819 | 12  | 108237572 | Island        | NA           | 72.6227389  | 0.000126 | 0.036836 |
| cg27540367 | 19  | 41848134  | Other         | TGFB1        | -58.915891  | 0.000126 | 0.036836 |
| cg06871560 | 15  | 52944233  | Other         | FAM214A      | 64.131718   | 0.000126 | 0.036836 |
| cg24733384 | 14  | 35516283  | S_Shore       | FAM177A1     | 49.40684    | 0.000126 | 0.036836 |
| cg19579652 | 10  | 433089    | Other         | DIP2C        | 27.2182735  | 0.000126 | 0.036836 |
| cg13817037 | 9   | 36100589  | Other         | RECK         | 38.6562238  | 0.000126 | 0.036836 |
| cg16588947 | 12  | 131498749 | Other         | GPR133       | -131.24732  | 0.000127 | 0.036836 |
| cg04509542 | 11  | 29358540  | Other         | NA           | 35.5159259  | 0.000127 | 0.036836 |
| cg02124699 | 17  | 30590156  | N_Shelf       | RHBDL3       | 62.8199033  | 0.000127 | 0.036836 |
| cg15719339 | 21  | 17960584  | Other         | MIR125B2     | 35.5031389  | 0.000127 | 0.036836 |
| cg22911867 | 11  | 126173548 | Island        | DCPS         | 64.2646366  | 0.000127 | 0.036836 |
| cg20978380 | 12  | 125001165 | N_Shore       | NCOR2        | 33.281085   | 0.000127 | 0.036836 |
| cg26984593 | 10  | 14051636  | Other         | FRMD4A       | 44.8885081  | 0.000127 | 0.036836 |
| cg16129526 | 14  | 69968273  | Other         | PLEKHD1      | 35.5493835  | 0.000127 | 0.036836 |
| cg18275620 | 6   | 110591226 | Other         | METTL24      | 30.7679379  | 0.000127 | 0.036836 |
| cg13043454 | 2   | 48980605  | N_Shelf       | LHCGR        | -70.142874  | 0.000127 | 0.036836 |
| cg13728131 | 11  | 19799633  | S_Shore       | NAV2         | 56.7727934  | 0.000128 | 0.036836 |
| cg20535781 | 12  | 133465013 | S_Shore       | CHFR         | 49.419619   | 0.000128 | 0.036836 |
| cg15382933 | 11  | 33745399  | Other         | CD59         | -35.821905  | 0.000128 | 0.036836 |
| cg22487204 | 1   | 156435421 | Other         | MEF2D        | 88.4269515  | 0.000128 | 0.036836 |
| cg15674813 | 2   | 238608549 | Other         | LRRFIP1      | -51.617855  | 0.000128 | 0.036836 |
| cg12042264 | 20  | 44448693  | N_Shelf       | NA           | -59.432309  | 0.000128 | 0.036836 |
| cg15339981 | 12  | 2942368   | Other         | NRIP2        | 39.9240294  | 0.000128 | 0.036836 |
| cg11410920 | 20  | 43997025  | Other         | SYS1-DBNDD2  | -66.875783  | 0.000128 | 0.036836 |
| cg21031128 | 8   | 21771278  | S_Shore       | DOK2         | -47.831148  | 0.000129 | 0.036836 |
| cg19102740 | 6   | 33860642  | Other         | LOC100507584 | -79.600864  | 0.000129 | 0.036836 |

Supplemental Table 1. 2,573 BMI-Associated Methylation Sites in the Normal Breast Study, adjusting for age, race, and alcohol use

| Probe      | CHR | MAPINFO   | CPG Location* | Gene         | Coefficient | p-value  | q-value  |
|------------|-----|-----------|---------------|--------------|-------------|----------|----------|
| cg14608454 | 9   | 140106083 | N_Shore       | NDOR1        | -119.27574  | 0.000129 | 0.036836 |
| cg26814335 | 8   | 6584320   | Other         | AGPAT5       | -79.804248  | 0.000129 | 0.036836 |
| cg05756918 | 7   | 27253707  | Island        | NA           | -47.792921  | 0.000129 | 0.036867 |
| cg25204955 | 10  | 72254314  | Other         | PALD1        | -48.322886  | 0.00013  | 0.036971 |
| cg25742037 | 11  | 2171694   | Other         | IGF2         | 35.9568574  | 0.00013  | 0.037021 |
| cg00136477 | 1   | 22970339  | N_Shelf       | C1QC         | -54.413519  | 0.00013  | 0.037056 |
| cg02771464 | 22  | 19108494  | N_Shore       | DGCR2        | 33.0148572  | 0.000131 | 0.037094 |
| cg03715057 | 6   | 164009761 | Other         | NA           | -95.751053  | 0.000131 | 0.037094 |
| cg14944269 | 14  | 65439602  | S_Shore       | RAB15        | 45.4477371  | 0.000131 | 0.037094 |
| cg06673130 | 4   | 778924    | Island        | LOC100129917 | -44.040786  | 0.000131 | 0.037094 |
| cg04615460 | 12  | 115125098 | Island        | TBX3         | -36.995063  | 0.000131 | 0.037094 |
| cg07484220 | 16  | 136809    | Other         | NPRL3        | 26.7697629  | 0.000131 | 0.037094 |
| cg15215077 | 6   | 119561839 | Other         | MAN1A1       | -40.249272  | 0.000131 | 0.037094 |
| cg09888840 | 11  | 57252371  | S_Shore       | SLC43A1      | -78.42696   | 0.000131 | 0.037094 |
| cg05125838 | 3   | 48601585  | Other         | UCN2         | -64.618159  | 0.000131 | 0.037094 |
| cg21268658 | 1   | 43998294  | S_Shore       | PTPRF        | 32.7020801  | 0.000132 | 0.037094 |
| cg11480762 | 10  | 73103395  | Other         | SLC29A3      | -68.177803  | 0.000132 | 0.037094 |
| cg03690812 | 12  | 111875483 | Other         | SH2B3        | -80.964684  | 0.000132 | 0.037094 |
| cg18333339 | 3   | 112885856 | Other         | NA           | 39.9578434  | 0.000132 | 0.037139 |
| cg17113856 | 6   | 32120895  | N_Shore       | PPT2         | 32.4609458  | 0.000132 | 0.037139 |
| cg20087093 | 7   | 27142799  | N_Shore       | HOXA2        | -22.588744  | 0.000132 | 0.037139 |
| cg08183317 | 13  | 114261934 | S_Shore       | TFDP1        | -54.859708  | 0.000133 | 0.037189 |
| cg13344587 | 10  | 63723919  | Other         | ARID5B       | 41.6503237  | 0.000133 | 0.037189 |
| cg25685359 | 22  | 46473721  | Other         | NA           | 53.4112328  | 0.000133 | 0.037189 |
| cg24250588 | 1   | 43203008  | N_Shore       | CLDN19       | -33.466093  | 0.000133 | 0.037189 |
| cg05227055 | 16  | 89105031  | N_Shelf       | NA           | 145.251678  | 0.000134 | 0.0372   |
| cg01191154 | 22  | 37593672  | N_Shore       | NA           | 35.5540195  | 0.000134 | 0.0372   |
| cg18351781 | 19  | 4950888   | Island        | UHRF1        | -64.807223  | 0.000134 | 0.0372   |
| cg21785723 | 1   | 6551782   | S_Shore       | PLEKHG5      | -62.285059  | 0.000134 | 0.0372   |
| cg14272084 | 14  | 61685564  | Other         | NA           | -32.164451  | 0.000134 | 0.0372   |
| cg03301498 | 19  | 39889222  | N_Shelf       | MED29        | -61.843928  | 0.000134 | 0.0372   |
| cg23753807 | 17  | 1090291   | Other         | ABR          | 35.5121739  | 0.000134 | 0.0372   |
| cg15514896 | 1   | 229074115 | Other         | NA           | -34.075584  | 0.000134 | 0.0372   |
| cg23723486 | 7   | 101361745 | Other         | NA           | -45.448222  | 0.000134 | 0.0372   |
| cg19460792 | 15  | 47676823  | Other         | SEMA6D       | 35.8921898  | 0.000135 | 0.037279 |
| cg05861512 | 14  | 94442960  | Other         | ASB2         | -34.021355  | 0.000135 | 0.037279 |
| cg03247944 | 12  | 3472883   | N_Shelf       | NA           | -34.468176  | 0.000135 | 0.037313 |
| cg06545464 | 6   | 32299649  | Other         | C6orf10      | -87.041104  | 0.000135 | 0.037313 |
| cg06064964 | 20  | 62199181  | N_Shore       | HELZ2        | -43.69861   | 0.000135 | 0.037313 |
| cg19771173 | 1   | 204296545 | Other         | PLEKHA6      | -41.537495  | 0.000136 | 0.037337 |
| cg27308445 | 5   | 149699675 | Other         | NA           | 25.493822   | 0.000136 | 0.037337 |

Supplemental Table 1. 2,573 BMI-Associated Methylation Sites in the Normal Breast Study, adjusting for age, race, and alcohol use

| Probe      | CHR | MAPINFO   | CPG Location* | Gene     | Coefficient | p-value  | q-value  |
|------------|-----|-----------|---------------|----------|-------------|----------|----------|
| cg08981777 | 19  | 48497737  | Other         | ELSPBP1  | 28.054049   | 0.000136 | 0.037337 |
| cg13695585 | 6   | 30853014  | S_Shore       | DDR1     | 34.1146389  | 0.000136 | 0.037337 |
| cg07489413 | 11  | 2321937   | Other         | C11orf21 | -43.129365  | 0.000136 | 0.037385 |
| cg20668644 | 17  | 38347603  | Island        | RAPGEFL1 | 1195.47276  | 0.000137 | 0.037427 |
| cg17147917 | 8   | 119809044 | Other         | NA       | 52.4878518  | 0.000137 | 0.037427 |
| cg03755794 | 5   | 156390431 | Other         | TIMD4    | -71.897197  | 0.000137 | 0.037427 |
| cg06366374 | 6   | 6543659   | N_Shelf       | LY86-AS1 | -48.75929   | 0.000137 | 0.037427 |
| cg04880487 | 11  | 68436821  | N_Shore       | NA       | -63.843849  | 0.000137 | 0.037476 |
| cg25501422 | 2   | 121108133 | S_Shore       | INHBB    | -63.384006  | 0.000138 | 0.037481 |
| cg20454518 | 12  | 133135463 | Island        | FBRSL1   | -45.090961  | 0.000138 | 0.037481 |
| cg01372551 | 7   | 98050564  | Other         | NA       | 57.2673267  | 0.000138 | 0.037481 |
| cg06332304 | 10  | 126782397 | Other         | CTBP2    | 33.6198574  | 0.000138 | 0.037481 |
| cg16260126 | 10  | 4892269   | Other         | NA       | -29.347402  | 0.000138 | 0.037481 |
| cg04318619 | 17  | 1090300   | Other         | ABR      | 29.0602735  | 0.000138 | 0.037481 |
| cg21023831 | 2   | 218769784 | Other         | TNS1     | -51.774688  | 0.000138 | 0.037544 |
| cg06158944 | 4   | 99182422  | Island        | RAP1GDS1 | 731.602927  | 0.000139 | 0.037544 |
| cg07110356 | 17  | 56355431  | Island        | MPO      | -58.601989  | 0.000139 | 0.037566 |
| cg08995327 | 16  | 66070379  | Other         | NA       | -34.416892  | 0.000139 | 0.037623 |
| cg19299755 | 11  | 116706051 | N_Shore       | APOA1    | -32.54235   | 0.00014  | 0.037623 |
| cg15010140 | 2   | 128644922 | S_Shore       | AMMECR1L | 39.3834891  | 0.00014  | 0.037623 |
| cg01289343 | 13  | 114814401 | Island        | RASA3    | -44.615164  | 0.00014  | 0.037623 |
| cg26591391 | 7   | 117644097 | Other         | NA       | -36.303028  | 0.00014  | 0.037623 |
| cg17742416 | 2   | 25499619  | N_Shore       | DNMT3A   | -53.483898  | 0.00014  | 0.037623 |
| cg13511576 | 6   | 31634890  | S_Shore       | GPANK1   | 63.1812802  | 0.00014  | 0.037623 |
| cg06108383 | 6   | 32120899  | N_Shore       | PPT2     | 31.1888076  | 0.00014  | 0.037623 |
| cg10996589 | 12  | 125017134 | Other         | NCOR2    | 27.7391676  | 0.00014  | 0.037623 |
| cg06372522 | X   | 118374789 | S_Shelf       | PGRMC1   | 29.6754732  | 0.00014  | 0.037626 |
| cg01102307 | 1   | 9340416   | Other         | NA       | 56.4836834  | 0.000141 | 0.037641 |
| cg26948226 | 2   | 192365744 | Other         | NA       | 26.7260649  | 0.000141 | 0.037642 |
| cg01458495 | 3   | 48310544  | Other         | ZNF589   | 25.6887971  | 0.000141 | 0.037642 |
| cg25950638 | 15  | 70451935  | Other         | NA       | -67.571481  | 0.000141 | 0.037677 |
| cg13408086 | 9   | 140221397 | S_Shelf       | EXD3     | -63.735458  | 0.000142 | 0.037677 |
| cg15096829 | 1   | 202092005 | Other         | GPR37L1  | 37.3130835  | 0.000142 | 0.037677 |
| cg26741350 | 19  | 33462235  | N_Shore       | CEP89    | 55.3186471  | 0.000142 | 0.037677 |
| cg17661220 | 20  | 3693179   | Other         | NA       | -56.572674  | 0.000142 | 0.037677 |
| cg15721134 | 10  | 133806677 | Other         | NA       | -71.080412  | 0.000142 | 0.037739 |
| cg16061668 | 11  | 70257149  | N_Shore       | CTTN     | -64.390008  | 0.000143 | 0.037801 |
| cg22337438 | 19  | 54327437  | Other         | NLRP12   | -45.844694  | 0.000143 | 0.037801 |
| cg15059548 | 7   | 47344634  | Other         | TNS3     | -41.579977  | 0.000143 | 0.037801 |
| cg11185291 | 9   | 139744617 | Island        | PHPT1    | 46.1871154  | 0.000143 | 0.037801 |
| cg10671830 | 4   | 7652103   | Other         | SORCS2   | -46.186945  | 0.000143 | 0.037801 |

Supplemental Table 1. 2,573 BMI-Associated Methylation Sites in the Normal Breast Study, adjusting for age, race, and alcohol use

| Probe      | CHR | MAPINFO   | CPG Location* | Gene     | Coefficient | p-value  | q-value  |
|------------|-----|-----------|---------------|----------|-------------|----------|----------|
| cg09062708 | 1   | 61649907  | Other         | NFIA     | 33.3063183  | 0.000144 | 0.037801 |
| cg13344855 | 19  | 11300651  | N_Shelf       | KANK2    | 35.3683094  | 0.000144 | 0.037801 |
| cg09358422 | 1   | 1023247   | Island        | C1orf159 | 26.3219797  | 0.000144 | 0.037801 |
| cg23554164 | 8   | 118960159 | Other         | EXT1     | 55.0574122  | 0.000144 | 0.037801 |
| cg22249566 | X   | 16737422  | N_Shore       | SYAP1    | 119.598547  | 0.000144 | 0.037801 |
| cg04204669 | 11  | 2193742   | Other         | MIR4686  | -56.575315  | 0.000144 | 0.037801 |
| cg21218848 | 9   | 139604168 | N_Shelf       | FAM69B   | -156.97934  | 0.000144 | 0.037801 |
| cg26917745 | 7   | 30939723  | Other         | NA       | -30.750289  | 0.000145 | 0.037801 |
| cg18333220 | 2   | 75655854  | Other         | NA       | -55.285231  | 0.000145 | 0.037801 |
| cg13939462 | 6   | 36843324  | S_Shore       | PPIL1    | 37.0247165  | 0.000145 | 0.037801 |
| cg16744996 | 14  | 70168865  | Other         | KIAA0247 | -23.371487  | 0.000145 | 0.037801 |
| cg24038762 | 1   | 87817476  | Other         | NA       | 49.1848283  | 0.000145 | 0.037801 |
| cg05149343 | 7   | 25897590  | N_Shore       | NA       | -40.818426  | 0.000145 | 0.037801 |
| cg24149237 | 11  | 117687628 | Other         | NA       | -51.402619  | 0.000146 | 0.037801 |
| cg23440155 | 1   | 47264601  | Other         | CYP4B1   | 41.7188208  | 0.000146 | 0.037801 |
| cg09540612 | 20  | 62492233  | N_Shore       | ABHD16B  | -49.529182  | 0.000146 | 0.037801 |
| cg19187121 | 15  | 101628653 | N_Shore       | NA       | -35.904914  | 0.000146 | 0.037801 |
| cg10147479 | 4   | 185872977 | Island        | NA       | -100.70791  | 0.000146 | 0.037801 |
| cg11941929 | 18  | 12429120  | N_Shelf       | SLMO1    | -50.229042  | 0.000146 | 0.037801 |
| cg13483727 | 18  | 615471    | Other         | CLUL1    | -69.530535  | 0.000146 | 0.037801 |
| cg24096540 | 17  | 12695725  | S_Shelf       | ARHGAP44 | -112.92185  | 0.000146 | 0.037801 |
| cg11404380 | 4   | 41215359  | N_Shore       | APBB2    | 90.1598686  | 0.000146 | 0.037801 |
| cg03565868 | 11  | 47400146  | S_Shore       | SPI1     | -46.968622  | 0.000146 | 0.037801 |
| cg06471380 | 2   | 240878436 | Island        | MIR4786  | -55.969897  | 0.000146 | 0.037801 |
| cg01643712 | 11  | 112112572 | Other         | NA       | 35.6324565  | 0.000147 | 0.037801 |
| cg06481660 | 6   | 6824580   | Other         | NA       | -117.51063  | 0.000147 | 0.037801 |
| cg25302015 | 19  | 18713816  | N_Shelf       | CRLF1    | -72.313442  | 0.000147 | 0.037801 |
| cg16360668 | 1   | 19265059  | Other         | IFFO2    | -44.560365  | 0.000147 | 0.037801 |
| cg02647628 | 7   | 114053988 | Other         | FOXP2    | 33.9732044  | 0.000147 | 0.037801 |
| cg16266227 | 1   | 202129204 | Other         | PTPN7    | -41.464781  | 0.000147 | 0.037801 |
| cg03601229 | 17  | 73748344  | N_Shore       | ITGB4    | -58.088599  | 0.000147 | 0.037801 |
| cg15366423 | 18  | 48089684  | S_Shelf       | MAPK4    | -76.495776  | 0.000147 | 0.037801 |
| cg13521229 | 19  | 51013630  | N_Shore       | JOSD2    | 55.9320714  | 0.000147 | 0.037801 |
| cg08043565 | 11  | 12308645  | Other         | MICALCL  | 25.0396164  | 0.000148 | 0.037802 |
| cg20367923 | 6   | 169624501 | S_Shore       | THBS2    | 43.464555   | 0.000148 | 0.037802 |
| cg06959773 | 7   | 76033795  | S_Shelf       | SRCRB4D  | -62.652536  | 0.000148 | 0.037802 |
| cg22867608 | 10  | 64573356  | Island        | EGR2     | 27.2052924  | 0.000148 | 0.037802 |
| cg13348574 | 17  | 207478    | S_Shore       | RPH3AL   | 46.4051469  | 0.000148 | 0.037802 |
| cg10129493 | 19  | 51728586  | Other         | CD33     | -66.19394   | 0.000149 | 0.037892 |
| cg08545136 | 17  | 76775543  | N_Shore       | CYTH1    | -54.104552  | 0.000149 | 0.037903 |
| cg01040259 | 17  | 73314451  | Other         | GRB2     | -54.193555  | 0.000149 | 0.037903 |

Supplemental Table 1. 2,573 BMI-Associated Methylation Sites in the Normal Breast Study, adjusting for age, race, and alcohol use

| Probe      | CHR | MAPINFO   | CPG Location* | Gene         | Coefficient | p-value  | q-value  |
|------------|-----|-----------|---------------|--------------|-------------|----------|----------|
| cg25752703 | 3   | 128710390 | N_Shelf       | KIAA1257     | -42.904647  | 0.000149 | 0.037996 |
| cg12176605 | 3   | 40518138  | N_Shore       | ZNF619       | -23.905074  | 0.00015  | 0.038024 |
| cg01938023 | 5   | 138855699 | Other         | TMEM173      | -82.553072  | 0.00015  | 0.038045 |
| cg04483936 | 15  | 57668247  | N_Shore       | CGNL1        | -55.351203  | 0.00015  | 0.038045 |
| cg08610987 | 1   | 157972005 | Other         | KIRREL       | 25.4764651  | 0.00015  | 0.038045 |
| cg06523948 | 16  | 56640947  | N_Shore       | MT2A         | 36.7317595  | 0.00015  | 0.038045 |
| cg07588216 | 20  | 25204045  | Other         | ENTPD6       | 84.8565014  | 0.000151 | 0.038084 |
| cg12223090 | 17  | 80128788  | Other         | CCDC57       | -84.347296  | 0.000151 | 0.038116 |
| cg06834507 | 1   | 200876957 | N_Shelf       | C1orf106     | -57.493076  | 0.000151 | 0.038116 |
| cg02665037 | 12  | 54362496  | S_Shore       | HOTAIR       | -40.571083  | 0.000151 | 0.03816  |
| cg25141611 | 13  | 113422162 | S_Shore       | ATP11A       | -57.563798  | 0.000151 | 0.038167 |
| cg11740845 | 17  | 8638742   | Other         | CCDC42       | -58.608302  | 0.000152 | 0.038183 |
| cg00136547 | 6   | 56507796  | Other         | DST          | 22.7037723  | 0.000152 | 0.038183 |
| cg22275857 | 22  | 38198963  | N_Shore       | H1FO         | 187.703407  | 0.000152 | 0.03819  |
| cg04141129 | 12  | 32530696  | Other         | BICD1        | -110.67905  | 0.000152 | 0.038235 |
| cg21746459 | 9   | 104160900 | Island        | MRPL50       | 562.689142  | 0.000153 | 0.03837  |
| cg24129356 | 6   | 32920735  | Other         | HLA-DMA      | -31.298307  | 0.000153 | 0.03837  |
| cg08165083 | 1   | 10589400  | Other         | PEX14        | -35.653213  | 0.000153 | 0.03837  |
| cg11363168 | 8   | 38470662  | Other         | NA           | 38.9533811  | 0.000153 | 0.03837  |
| cg10141022 | 7   | 140624905 | Island        | BRAF         | -465.71952  | 0.000154 | 0.038379 |
| cg19269039 | 1   | 111743200 | N_Shelf       | DENND2D      | -55.747444  | 0.000154 | 0.038379 |
| cg09820180 | 6   | 140168822 | Other         | LOC100132735 | 34.5758577  | 0.000154 | 0.03838  |
| cg09760574 | 20  | 34605662  | Other         | CNBD2        | 30.7586166  | 0.000154 | 0.038397 |
| cg23497683 | 2   | 100759159 | Other         | AFF3         | -35.31166   | 0.000154 | 0.038397 |
| cg10454879 | 8   | 602158    | S_Shore       | NA           | -28.932948  | 0.000154 | 0.038397 |
| cg12871835 | 6   | 134639417 | S_Shore       | SGK1         | 93.1862072  | 0.000155 | 0.038397 |
| cg21714809 | 11  | 72463184  | Island        | ARAP1        | 88.1867261  | 0.000155 | 0.038397 |
| cg01710147 | 1   | 207233419 | Other         | PFKFB2       | 37.5647543  | 0.000155 | 0.038397 |
| cg13670898 | 14  | 56792319  | Other         | NA           | 25.178358   | 0.000155 | 0.03841  |
| cg19122948 | 17  | 80207982  | N_Shore       | CSNK1D       | 78.3882557  | 0.000155 | 0.038456 |
| cg04103052 | 2   | 1203162   | Other         | SNTG2        | 56.0040766  | 0.000155 | 0.038456 |
| cg03191919 | 3   | 196134040 | Other         | UBXN7        | 28.4184081  | 0.000156 | 0.03853  |
| cg16923982 | 2   | 233369610 | S_Shore       | NA           | -44.314741  | 0.000156 | 0.03853  |
| cg24523322 | 1   | 1023281   | Island        | C1orf159     | 24.4899274  | 0.000156 | 0.038576 |
| cg27185501 | 11  | 12562492  | Other         | NA           | 27.90309    | 0.000157 | 0.038613 |
| cg20061364 | 6   | 160582602 | Other         | NA           | -88.605028  | 0.000157 | 0.038613 |
| cg08967456 | 16  | 3114948   | Other         | IL32         | -63.188599  | 0.000157 | 0.038622 |
| cg27182923 | 3   | 123129387 | Other         | ADCY5        | -80.765811  | 0.000157 | 0.038634 |
| cg05628702 | 20  | 35491052  | Island        | SOGA1        | 30.6937037  | 0.000157 | 0.038639 |
| cg05584759 | 12  | 57869421  | Island        | ARHGAP9      | 47.1290921  | 0.000157 | 0.038639 |
| cg11525052 | 11  | 2321955   | Other         | C11orf21     | -59.338733  | 0.000157 | 0.038639 |

Supplemental Table 1. 2,573 BMI-Associated Methylation Sites in the Normal Breast Study, adjusting for age, race, and alcohol use

| Probe      | CHR | MAPINFO   | CPG Location* | Gene         | Coefficient | p-value  | q-value  |
|------------|-----|-----------|---------------|--------------|-------------|----------|----------|
| cg08165784 | 12  | 107297238 | Other         | NA           | 134.170955  | 0.000158 | 0.038645 |
| cg16637458 | 13  | 113585948 | Other         | NA           | 29.8394482  | 0.000158 | 0.038645 |
| cg26574754 | 13  | 108870827 | Island        | ABHD13       | 838.743791  | 0.000158 | 0.038645 |
| cg06655952 | 5   | 80364036  | Other         | RASGRF2      | -29.994686  | 0.000158 | 0.0387   |
| cg00206233 | 21  | 44011158  | S_Shore       | NA           | -33.25758   | 0.000159 | 0.0387   |
| cg09918657 | 16  | 14397207  | S_Shore       | MIR193B      | -30.645359  | 0.000159 | 0.0387   |
| cg17470397 | 3   | 193308169 | N_Shelf       | OPA1         | -90.701155  | 0.000159 | 0.0387   |
| cg07648709 | 11  | 73043675  | Other         | ARHGEF17     | 27.0462899  | 0.000159 | 0.0387   |
| cg26951839 | 5   | 77801011  | Other         | LHFPL2       | 36.6252197  | 0.000159 | 0.0387   |
| cg27206665 | 7   | 107822217 | Other         | NRCAM        | -28.496429  | 0.000159 | 0.0387   |
| cg14478255 | 2   | 1425035   | Other         | TPO          | 43.3706386  | 0.00016  | 0.038846 |
| cg14965694 | 14  | 102226416 | N_Shore       | PPP2R5C      | 31.7355771  | 0.00016  | 0.038867 |
| cg11810998 | 1   | 212819593 | Other         | NA           | -37.897655  | 0.000161 | 0.038939 |
| cg06639585 | 6   | 36236936  | Other         | PNPLA1       | -72.213278  | 0.000161 | 0.038939 |
| cg11674933 | 1   | 36948313  | Other         | CSF3R        | -42.900987  | 0.000161 | 0.038957 |
| cg03551062 | 16  | 88041289  | S_Shore       | BANP         | -30.189779  | 0.000161 | 0.038957 |
| cg23919433 | 17  | 79830196  | S_Shore       | ARHGDI1      | 620.287727  | 0.000161 | 0.038981 |
| cg03390187 | 11  | 65256983  | Other         | NA           | 39.3403245  | 0.000161 | 0.038981 |
| cg01314252 | 3   | 9943828   | Other         | IL17RE       | -55.727272  | 0.000162 | 0.039031 |
| cg13101705 | 1   | 183248593 | Other         | NMNAT2       | -37.294805  | 0.000162 | 0.039034 |
| cg09182750 | 15  | 99979346  | Other         | NA           | -40.692859  | 0.000162 | 0.039034 |
| cg07889201 | 20  | 2490030   | S_Shore       | ZNF343       | 70.5052081  | 0.000162 | 0.039034 |
| cg03225093 | 5   | 2008713   | S_Shore       | NA           | 35.3136547  | 0.000162 | 0.039034 |
| cg11062056 | 12  | 52249852  | Other         | NA           | 46.2327081  | 0.000162 | 0.039034 |
| cg16340152 | 8   | 81789991  | S_Shelf       | ZNF704       | -35.666473  | 0.000163 | 0.039034 |
| cg04028450 | 8   | 23201488  | Other         | LOC100507156 | 36.5132786  | 0.000163 | 0.039034 |
| cg27631256 | 9   | 117692745 | Other         | TNFSF8       | -37.471495  | 0.000163 | 0.039034 |
| cg06219695 | 16  | 434256    | S_Shore       | LOC100134368 | -50.392743  | 0.000163 | 0.039046 |
| cg14421700 | 17  | 77755965  | N_Shelf       | CBX2         | -39.826362  | 0.000164 | 0.039165 |
| cg13523819 | 3   | 69915449  | Other         | MITF         | 38.7504575  | 0.000164 | 0.039165 |
| cg25466245 | 1   | 223407095 | Other         | SUSD4        | 30.4828611  | 0.000164 | 0.039165 |
| cg05694749 | 11  | 92616492  | Island        | FAT3         | -97.747176  | 0.000164 | 0.039165 |
| cg10215604 | 19  | 15375418  | Other         | BRD4         | 30.3509653  | 0.000165 | 0.03924  |
| cg04921244 | 17  | 72096219  | Other         | NA           | 114.488663  | 0.000165 | 0.03924  |
| cg09889997 | 1   | 7692321   | Other         | CAMTA1       | -51.037748  | 0.000165 | 0.03924  |
| cg23829395 | 12  | 46796953  | Other         | NA           | 43.7677422  | 0.000165 | 0.039321 |
| cg16548254 | 2   | 27601342  | Island        | ZNF513       | 47.2741178  | 0.000166 | 0.03935  |
| cg04541607 | 22  | 27013978  | Other         | CRYBB1       | -51.726152  | 0.000166 | 0.03935  |
| cg01582947 | 7   | 149156500 | N_Shore       | ZNF777       | 57.7250889  | 0.000166 | 0.03935  |
| cg27372422 | 19  | 41086247  | S_Shelf       | SHKBP1       | -65.64821   | 0.000166 | 0.03935  |
| cg03519711 | 1   | 86046512  | Island        | CYR61        | 2238.49778  | 0.000167 | 0.03935  |

Supplemental Table 1. 2,573 BMI-Associated Methylation Sites in the Normal Breast Study, adjusting for age, race, and alcohol use

| Probe      | CHR | MAPINFO   | CPG Location* | Gene         | Coefficient | p-value  | q-value  |
|------------|-----|-----------|---------------|--------------|-------------|----------|----------|
| cg01923089 | 12  | 49627746  | N_Shore       | NA           | -49.380015  | 0.000167 | 0.03935  |
| cg02035102 | 7   | 23603991  | Other         | NA           | 51.9326316  | 0.000167 | 0.03935  |
| cg06011086 | 8   | 61823275  | S_Shore       | NA           | -66.18384   | 0.000167 | 0.03935  |
| cg25785639 | 6   | 33385083  | N_Shore       | CUTA         | 427.40326   | 0.000167 | 0.03935  |
| cg09247486 | 1   | 61437380  | Other         | NA           | 40.2344922  | 0.000167 | 0.03935  |
| cg22575540 | 2   | 27505625  | Other         | TRIM54       | -57.972051  | 0.000167 | 0.03935  |
| cg02865595 | 1   | 36771714  | N_Shore       | SH3D21       | 23.5664909  | 0.000167 | 0.03935  |
| cg09714789 | 13  | 113422497 | N_Shelf       | ATP11A       | -42.881437  | 0.000167 | 0.03935  |
| cg01241390 | 5   | 80596277  | N_Shore       | LOC100131067 | 32.0546369  | 0.000168 | 0.039405 |
| cg03328673 | 13  | 22687730  | Other         | NA           | -45.013385  | 0.000168 | 0.039445 |
| cg03892601 | 7   | 148036314 | N_Shore       | CNTNAP2      | 54.9813435  | 0.000168 | 0.039458 |
| cg01621764 | 19  | 8809175   | S_Shore       | ACTL9        | 33.170629   | 0.000168 | 0.039475 |
| cg25214914 | 1   | 155910523 | Other         | RXFP4        | -50.106663  | 0.000169 | 0.039514 |
| cg09012411 | 1   | 95167783  | Other         | NA           | -31.02147   | 0.000169 | 0.039514 |
| cg26678516 | 12  | 107078680 | Other         | LOC100505978 | -90.025089  | 0.000169 | 0.039619 |
| cg18162583 | 6   | 85484717  | Island        | NA           | -44.613366  | 0.00017  | 0.039619 |
| cg22393213 | 2   | 237478526 | S_Shore       | ACKR3        | 241.836757  | 0.00017  | 0.039619 |
| cg12492900 | 12  | 132551078 | Other         | EP400        | -25.72347   | 0.00017  | 0.039619 |
| cg04785902 | 6   | 22878214  | Other         | NA           | 23.4015     | 0.00017  | 0.039619 |
| cg11978048 | 8   | 63951797  | Island        | GGH          | 2569.19466  | 0.00017  | 0.039619 |
| cg13105234 | 4   | 1550473   | N_Shelf       | NA           | 37.4787179  | 0.00017  | 0.039619 |
| cg04856896 | 1   | 32665450  | N_Shore       | CCDC28B      | 39.8638552  | 0.000171 | 0.039619 |
| cg21582831 | 3   | 47029458  | Other         | NBEAL2       | -35.519264  | 0.000171 | 0.039619 |
| cg11526866 | 1   | 20813614  | S_Shore       | CAMK2N1      | 42.8065738  | 0.000171 | 0.039619 |
| cg12165022 | 19  | 3785573   | Island        | MATK         | 102.591963  | 0.000171 | 0.039619 |
| cg03994959 | 13  | 108866993 | N_Shore       | LIG4         | 23.5336825  | 0.000171 | 0.039619 |
| cg09338875 | 16  | 4818532   | N_Shore       | ZNF500       | 244.288922  | 0.000171 | 0.039619 |
| cg27213549 | 10  | 44102591  | S_Shore       | ZNF485       | 32.8679808  | 0.000171 | 0.039619 |
| cg11847992 | 5   | 95590917  | Other         | NA           | 33.1695544  | 0.000171 | 0.039619 |
| cg03681335 | 2   | 108903965 | Other         | SULT1C2      | -77.38827   | 0.000172 | 0.039619 |
| cg05380759 | 3   | 45579354  | Other         | LARS2        | -61.125096  | 0.000172 | 0.039619 |
| cg12554857 | 4   | 95264019  | Other         | HPGDS        | -50.6371    | 0.000172 | 0.039619 |
| cg19188632 | 2   | 3702481   | S_Shelf       | ALLC         | -49.540113  | 0.000172 | 0.039619 |
| cg15490070 | 1   | 203148132 | Other         | MYBPH        | -50.406648  | 0.000172 | 0.039619 |
| cg04364339 | 10  | 91087703  | Other         | IFIT3        | 207.819892  | 0.000172 | 0.039644 |
| cg04567334 | 10  | 73408185  | Other         | CDH23        | 71.3271975  | 0.000172 | 0.039644 |
| cg05643373 | 19  | 49220422  | N_Shelf       | MAMSTR       | 94.4978492  | 0.000173 | 0.039644 |
| cg25132782 | 15  | 84047082  | N_Shore       | NA           | -37.491772  | 0.000173 | 0.039644 |
| cg22337624 | 16  | 72126421  | N_Shore       | TXNL4B       | 29.1505696  | 0.000173 | 0.039729 |
| cg26165660 | 12  | 76363767  | Other         | NA           | -57.219185  | 0.000174 | 0.039729 |
| cg00141308 | 22  | 44725065  | N_Shore       | NA           | -42.101657  | 0.000174 | 0.039729 |

Supplemental Table 1. 2,573 BMI-Associated Methylation Sites in the Normal Breast Study, adjusting for age, race, and alcohol use

| Probe      | CHR | MAPINFO   | CPG Location* | Gene       | Coefficient | p-value  | q-value  |
|------------|-----|-----------|---------------|------------|-------------|----------|----------|
| cg24467535 | 4   | 100244604 | Other         | ADH1B      | -27.825046  | 0.000174 | 0.039729 |
| cg16749930 | 11  | 71709978  | Other         | IL18BP     | -29.943463  | 0.000174 | 0.039729 |
| cg16438525 | 3   | 52517742  | N_Shelf       | NISCH      | 25.8762416  | 0.000174 | 0.039729 |
| cg19198913 | 2   | 129495073 | Island        | NA         | -63.662136  | 0.000175 | 0.039729 |
| cg07986469 | 10  | 129795003 | Other         | PTPRE      | 41.989586   | 0.000175 | 0.039729 |
| cg12228319 | 18  | 34916814  | Island        | CELF4      | -125.7187   | 0.000175 | 0.039729 |
| cg04497992 | 16  | 616212    | S_Shore       | NHLRC4     | 36.2163106  | 0.000175 | 0.039729 |
| cg23051123 | 1   | 226132841 | Other         | LEFTY2     | -46.276909  | 0.000175 | 0.039729 |
| cg17433678 | 10  | 3135764   | Other         | PFKP       | -68.418085  | 0.000175 | 0.039729 |
| cg01165355 | 3   | 64225108  | Other         | NA         | 49.5613178  | 0.000175 | 0.039729 |
| cg02385661 | 19  | 13215729  | S_Shore       | LYL1       | -30.666889  | 0.000175 | 0.039729 |
| cg18154954 | 19  | 39055500  | Island        | RYS1       | -41.898443  | 0.000176 | 0.039729 |
| cg22873892 | 15  | 49447651  | S_Shore       | COPS2      | 526.31893   | 0.000176 | 0.039729 |
| cg17008473 | 2   | 38356469  | Other         | CYP1B1-AS1 | -78.787142  | 0.000176 | 0.039729 |
| cg04774469 | 14  | 21562632  | S_Shore       | ZNF219     | 40.8913316  | 0.000176 | 0.039729 |
| cg00830492 | 7   | 47432311  | Other         | TNS3       | 51.4296731  | 0.000176 | 0.039729 |
| cg02108015 | 2   | 161777404 | Other         | NA         | 34.5448373  | 0.000177 | 0.039729 |
| cg00048381 | 1   | 154587507 | Other         | ADAR       | 20.8846283  | 0.000177 | 0.039729 |
| cg02886838 | 14  | 64576663  | Other         | SYNE2      | -32.280405  | 0.000177 | 0.039729 |
| cg07675031 | 11  | 47399893  | Island        | SPI1       | -46.998785  | 0.000177 | 0.039729 |
| cg25817351 | 10  | 79977519  | Other         | NA         | -80.437349  | 0.000177 | 0.039729 |
| cg25574761 | 12  | 122688279 | Island        | B3GNT4     | 69.3800127  | 0.000177 | 0.039729 |
| cg12004641 | 2   | 218750749 | Other         | TNS1       | -45.571614  | 0.000177 | 0.039729 |
| cg01012082 | 8   | 71025759  | Other         | NCOA2      | 34.9859012  | 0.000177 | 0.039729 |
| cg02124724 | 21  | 46875142  | N_Shore       | COL18A1    | 41.3945576  | 0.000177 | 0.039729 |
| cg09335647 | 7   | 147097440 | Other         | CNTNAP2    | 33.4481038  | 0.000177 | 0.039729 |
| cg14556677 | 9   | 127054428 | Other         | NEK6       | -46.36526   | 0.000177 | 0.039729 |
| cg17353900 | 17  | 10101010  | N_Shore       | GAS7       | 57.343411   | 0.000178 | 0.039729 |
| cg10533990 | 11  | 71846733  | Other         | FOLR3      | -45.238268  | 0.000178 | 0.039729 |
| cg26358105 | 5   | 156247415 | Other         | NA         | -63.447261  | 0.000178 | 0.039729 |
| cg25325322 | 2   | 85073715  | Other         | TRABD2A    | -56.740865  | 0.000178 | 0.039862 |
| cg24948743 | 8   | 6481608   | Other         | MCPH1      | -33.373244  | 0.000179 | 0.039954 |
| cg23697410 | 10  | 71336363  | N_Shore       | NEUROG3    | 66.1689234  | 0.000179 | 0.039993 |
| cg15125438 | 12  | 113684389 | Other         | TPCN1      | 44.2904553  | 0.000179 | 0.039993 |
| cg10414208 | 17  | 74669923  | S_Shore       | NA         | 56.1268717  | 0.00018  | 0.039993 |
| cg07138115 | 8   | 26370349  | N_Shore       | PNMA2      | 54.8745306  | 0.00018  | 0.039993 |
| cg16792302 | 2   | 172945058 | Island        | METAP1D    | -16.65682   | 0.00018  | 0.039993 |
| cg27655512 | 11  | 2287421   | N_Shelf       | ASCL2      | -33.56921   | 0.00018  | 0.040065 |
| cg11591485 | 3   | 124839640 | Other         | SLC12A8    | 41.0358607  | 0.000181 | 0.040065 |
| cg18875357 | 14  | 105391263 | Other         | PLD4       | -49.839661  | 0.000181 | 0.040065 |
| cg19015961 | 10  | 90712748  | Other         | ACTA2      | 49.6978748  | 0.000181 | 0.040065 |

Supplemental Table 1. 2,573 BMI-Associated Methylation Sites in the Normal Breast Study, adjusting for age, race, and alcohol use

| Probe      | CHR | MAPINFO   | CPG Location* | Gene         | Coefficient | p-value  | q-value  |
|------------|-----|-----------|---------------|--------------|-------------|----------|----------|
| cg18568534 | 14  | 23240117  | S_Shelf       | OXA1L        | 74.9308115  | 0.000181 | 0.040065 |
| cg22241045 | 4   | 54363911  | Other         | LNX1-AS1     | 22.4990131  | 0.000182 | 0.040065 |
| cg17027260 | 2   | 109892050 | Other         | SH3RF3       | -24.474372  | 0.000182 | 0.040065 |
| cg25790133 | 4   | 2627014   | Other         | FAM193A      | 23.43666    | 0.000182 | 0.040065 |
| cg13666041 | 14  | 69442697  | N_Shore       | ACTN1        | 19.6754981  | 0.000182 | 0.040065 |
| cg15841728 | 1   | 114642507 | Other         | SYT6         | -42.421863  | 0.000182 | 0.040065 |
| cg04553793 | 2   | 25193837  | N_Shore       | DNAJC27      | 35.4317238  | 0.000182 | 0.040065 |
| cg08379738 | 19  | 6477033   | Island        | DENND1C      | 39.5205563  | 0.000182 | 0.040065 |
| cg06821075 | 10  | 99933209  | Other         | R3HCC1L      | -109.83992  | 0.000182 | 0.040065 |
| cg00369811 | 6   | 37673597  | Island        | NA           | -81.663875  | 0.000183 | 0.040065 |
| cg15569052 | 4   | 2814122   | Other         | SH3BP2       | -19.908985  | 0.000183 | 0.040065 |
| cg01702055 | 6   | 13303065  | Other         | NA           | -35.443785  | 0.000183 | 0.040065 |
| cg01026796 | 5   | 54602543  | N_Shore       | DHX29        | 32.2998951  | 0.000183 | 0.040065 |
| cg11277156 | 3   | 139066791 | S_Shelf       | MRPS22       | 65.6523191  | 0.000183 | 0.040131 |
| cg24514275 | 8   | 42037170  | Other         | PLAT         | -42.943387  | 0.000183 | 0.040146 |
| cg01383082 | 8   | 11323474  | N_Shore       | FAM167A      | 26.7620431  | 0.000184 | 0.040146 |
| cg19179572 | 17  | 80377872  | S_Shore       | OGFOD3       | -57.04883   | 0.000184 | 0.040146 |
| cg01012026 | 7   | 229388    | N_Shore       | FAM20C       | 38.9486756  | 0.000184 | 0.040146 |
| cg08061524 | 22  | 46472568  | Other         | NA           | 23.7196739  | 0.000184 | 0.040146 |
| cg07261920 | 5   | 156885069 | N_Shore       | NIPAL4       | -61.39981   | 0.000184 | 0.040146 |
| cg16842214 | 3   | 42727160  | Island        | KLHL40       | -48.776401  | 0.000184 | 0.040186 |
| cg09406921 | 8   | 37636099  | Other         | PROSC        | 49.9721869  | 0.000185 | 0.040214 |
| cg27334740 | 16  | 85215660  | Other         | NA           | -73.088167  | 0.000185 | 0.040214 |
| cg06167221 | 18  | 77336130  | Island        | NA           | 19.6369024  | 0.000185 | 0.040214 |
| cg11823624 | 7   | 150778724 | Island        | FASTK        | 60.4854062  | 0.000185 | 0.040214 |
| cg15726700 | 3   | 196370254 | S_Shelf       | NRROS        | -47.522134  | 0.000186 | 0.040214 |
| cg00600617 | 6   | 107221887 | Other         | LOC100422737 | 28.5816838  | 0.000186 | 0.040214 |
| cg20149168 | 1   | 68512807  | Island        | DIRAS3       | -68.65202   | 0.000186 | 0.040214 |
| cg04023434 | 1   | 183778265 | S_Shelf       | RGL1         | -98.892244  | 0.000186 | 0.040214 |
| cg00712762 | 1   | 36351470  | S_Shore       | AGO1         | 81.8392502  | 0.000186 | 0.040214 |
| cg21031035 | 13  | 110279787 | Other         | NA           | -57.493768  | 0.000186 | 0.040214 |
| cg00036871 | 2   | 220436894 | S_Shore       | INHA         | 63.8433497  | 0.000186 | 0.040214 |
| cg25927215 | 6   | 34677450  | Other         | NA           | 32.166448   | 0.000186 | 0.040214 |
| cg23713900 | 18  | 615496    | Other         | CLUL1        | -45.252514  | 0.000187 | 0.040214 |
| cg27080986 | 4   | 8396300   | Other         | ACOX3        | 31.6018407  | 0.000187 | 0.040214 |
| cg25134859 | 5   | 171340543 | Other         | FBXW11       | -19.50028   | 0.000187 | 0.040214 |
| cg24941342 | 11  | 95093809  | Other         | NA           | -28.049639  | 0.000187 | 0.040214 |
| cg27160007 | 19  | 41225374  | S_Shelf       | ITPKC        | 35.9007483  | 0.000187 | 0.040214 |
| cg08442088 | 7   | 44085357  | S_Shore       | DBNL         | -81.091605  | 0.000187 | 0.040214 |
| cg20992708 | 4   | 5637894   | Other         | EVC2         | -39.330726  | 0.000187 | 0.040214 |
| cg05254651 | 4   | 3705147   | Other         | NA           | 36.709127   | 0.000187 | 0.040224 |

Supplemental Table 1. 2,573 BMI-Associated Methylation Sites in the Normal Breast Study, adjusting for age, race, and alcohol use

| Probe      | CHR | MAPINFO   | CPG Location* | Gene         | Coefficient | p-value  | q-value  |
|------------|-----|-----------|---------------|--------------|-------------|----------|----------|
| cg17934470 | 5   | 49959703  | N_Shelf       | PARP8        | -26.575976  | 0.000188 | 0.040232 |
| cg15035143 | 17  | 56408688  | Other         | MIR142       | -48.254025  | 0.000188 | 0.040263 |
| cg04985661 | 6   | 12717192  | Other         | PHACTR1      | 28.9310741  | 0.000188 | 0.040263 |
| cg08642285 | 15  | 68498589  | Other         | CALML4       | -31.386344  | 0.000188 | 0.040263 |
| cg26401673 | 3   | 43431343  | Other         | ANO10        | -22.209042  | 0.000188 | 0.040263 |
| cg09256413 | 1   | 72566690  | Other         | NEGR1        | -30.704773  | 0.000188 | 0.040263 |
| cg25261361 | 8   | 145057101 | Other         | PARP10       | 74.0217046  | 0.000189 | 0.040289 |
| cg21680307 | 6   | 170398618 | N_Shelf       | NA           | -79.83733   | 0.000189 | 0.040289 |
| cg06023841 | 7   | 73308204  | Other         | NA           | 38.5102878  | 0.000189 | 0.040289 |
| cg22387253 | 15  | 61310104  | Other         | RORA         | 48.8271538  | 0.000189 | 0.040361 |
| cg25090051 | 20  | 57414059  | N_Shore       | GNAS         | -69.101589  | 0.00019  | 0.040398 |
| cg19956836 | 11  | 57241448  | N_Shelf       | RTN4RL2      | -47.989141  | 0.00019  | 0.040398 |
| cg23715045 | 11  | 124621944 | Other         | VSIG2        | 40.8902228  | 0.00019  | 0.040401 |
| cg17261120 | 11  | 12578707  | Other         | NA           | 34.4842633  | 0.00019  | 0.040412 |
| cg14590912 | 9   | 135905092 | N_Shore       | GTF3C5       | 41.8950468  | 0.000191 | 0.040412 |
| cg12157364 | 11  | 121612857 | Other         | NA           | 20.6613324  | 0.000191 | 0.040412 |
| cg07579839 | 4   | 2933748   | Island        | MFSD10       | -32.369802  | 0.000191 | 0.040412 |
| cg00192882 | 17  | 19291120  | Other         | MFAP4        | 32.331348   | 0.000191 | 0.040412 |
| cg03668763 | 11  | 9549286   | Other         | ZNF143       | 45.1263803  | 0.000191 | 0.040412 |
| cg14527564 | 7   | 100875556 | Island        | CLDN15       | 37.1255843  | 0.000191 | 0.040412 |
| cg08480068 | 16  | 29674959  | N_Shore       | SPN          | -59.52083   | 0.000191 | 0.04043  |
| cg02914427 | 16  | 29674184  | N_Shore       | SPN          | -45.998899  | 0.000191 | 0.04043  |
| cg20744756 | 1   | 95201495  | Other         | NA           | 19.8523358  | 0.000192 | 0.040431 |
| cg00415011 | 8   | 142046261 | Other         | NA           | -34.169793  | 0.000192 | 0.040431 |
| cg21587837 | 6   | 31525894  | Other         | NFKBIL1      | -48.059699  | 0.000192 | 0.040431 |
| cg23686831 | 15  | 93653310  | S_Shore       | NA           | -37.958315  | 0.000192 | 0.040458 |
| cg10492657 | 6   | 4854374   | Other         | CDYL         | 44.2743859  | 0.000193 | 0.040458 |
| cg24627789 | 8   | 1338463   | N_Shelf       | NA           | 31.3336105  | 0.000193 | 0.040458 |
| cg16008138 | 17  | 60885892  | S_Shore       | 10-Mar       | 46.5867813  | 0.000193 | 0.040458 |
| cg03039218 | 17  | 43025639  | S_Shore       | KIF18B       | 113.581635  | 0.000193 | 0.040498 |
| cg17075096 | 10  | 124623239 | Other         | FAM24B-CUZD1 | -88.997369  | 0.000193 | 0.040504 |
| cg19064258 | 16  | 22826117  | Island        | HS3ST2       | 92.6466387  | 0.000194 | 0.040529 |
| cg03116035 | 4   | 170897498 | Other         | LOC100506085 | -61.285244  | 0.000194 | 0.040529 |
| cg15240455 | 2   | 162480821 | Other         | SLC4A10      | 88.0169526  | 0.000194 | 0.040529 |
| cg07898087 | 4   | 17060364  | Other         | NA           | 21.4410219  | 0.000195 | 0.040529 |
| cg23273465 | 2   | 36588933  | S_Shelf       | CRIM1        | 28.3465265  | 0.000195 | 0.040529 |
| cg01206915 | 10  | 74856003  | Island        | P4HA1        | 502.131536  | 0.000195 | 0.040529 |
| cg17446719 | 1   | 16302584  | Island        | ZBTB17       | 1355.40366  | 0.000195 | 0.040529 |
| cg14395761 | 17  | 81018559  | S_Shelf       | NA           | -60.327361  | 0.000195 | 0.040529 |
| cg26195829 | 14  | 61122155  | N_Shore       | NA           | -30.792181  | 0.000195 | 0.040529 |
| cg03149130 | 9   | 93404977  | Island        | DIRAS2       | 115.716027  | 0.000195 | 0.040529 |

Supplemental Table 1. 2,573 BMI-Associated Methylation Sites in the Normal Breast Study, adjusting for age, race, and alcohol use

| Probe      | CHR | MAPINFO   | CPG Location* | Gene         | Coefficient | p-value  | q-value  |
|------------|-----|-----------|---------------|--------------|-------------|----------|----------|
| cg11854777 | 2   | 131597644 | S_Shelf       | NA           | -81.391948  | 0.000195 | 0.040529 |
| cg08272572 | 19  | 35953646  | Other         | NA           | -27.748545  | 0.000195 | 0.040529 |
| cg15545878 | 11  | 111782607 | Other         | CRYAB        | 38.3474607  | 0.000195 | 0.040529 |
| cg25453154 | 10  | 81203244  | N_Shore       | ZCCHC24      | 59.3575949  | 0.000196 | 0.040529 |
| cg20147326 | 11  | 33913538  | Other         | LMO2         | -81.748653  | 0.000196 | 0.040529 |
| cg23890469 | 10  | 88715317  | Other         | MMRN2        | -46.701182  | 0.000196 | 0.040529 |
| cg00263619 | 12  | 94727462  | Other         | CCDC41       | 43.881872   | 0.000197 | 0.040529 |
| cg01368217 | 10  | 127836603 | Other         | ADAM12       | 21.4227676  | 0.000197 | 0.040529 |
| cg26906998 | 17  | 17108846  | Island        | PLD6         | 38.4154925  | 0.000197 | 0.040529 |
| cg22502382 | 12  | 32701732  | Other         | FGD4         | 82.0368912  | 0.000197 | 0.040529 |
| cg00400041 | 5   | 180284090 | N_Shelf       | ZFP62        | -96.795     | 0.000197 | 0.040529 |
| cg17716663 | 19  | 45978434  | S_Shelf       | FOSB         | -27.810783  | 0.000197 | 0.040529 |
| cg22794775 | 4   | 106114477 | Other         | TET2         | -93.249912  | 0.000197 | 0.040529 |
| cg12284382 | 22  | 35940438  | S_Shelf       | RASD2        | -31.096477  | 0.000197 | 0.040529 |
| cg11510557 | 12  | 132312857 | Island        | MMP17        | 349.544504  | 0.000197 | 0.040529 |
| cg02604304 | 7   | 64451414  | Other         | ZNF117       | -74.898919  | 0.000197 | 0.040529 |
| cg06867863 | 2   | 66159330  | Other         | NA           | -33.909219  | 0.000197 | 0.040529 |
| cg25440680 | 4   | 77226417  | N_Shore       | STBD1        | -61.714443  | 0.000197 | 0.040529 |
| cg21167761 | 11  | 77903617  | N_Shelf       | USP35        | 29.3074535  | 0.000198 | 0.040558 |
| cg01641371 | 17  | 26712092  | Island        | SARM1        | -47.567716  | 0.000198 | 0.040558 |
| cg02334109 | 15  | 26044050  | Other         | ATP10A       | -44.290968  | 0.000198 | 0.040596 |
| cg26740109 | 18  | 77585428  | N_Shore       | NA           | -72.877982  | 0.000198 | 0.040596 |
| cg07177917 | 1   | 10724490  | N_Shore       | CASZ1        | 61.3225325  | 0.000199 | 0.040596 |
| cg07707505 | 1   | 12185435  | Other         | TNFRSF8      | -34.313654  | 0.000199 | 0.040596 |
| cg27278729 | 11  | 61666595  | Other         | RAB3IL1      | -63.23721   | 0.000199 | 0.040596 |
| cg02138358 | 17  | 56358318  | S_Shore       | MPO          | -65.697971  | 0.000199 | 0.040596 |
| cg15128679 | 5   | 134476728 | Other         | LOC100996485 | -47.806053  | 0.000199 | 0.040596 |
| cg24377826 | 10  | 126376113 | Other         | FAM53B       | -47.286425  | 0.000199 | 0.040596 |
| cg19190519 | 11  | 123175740 | S_Shelf       | NA           | -89.908899  | 0.0002   | 0.040596 |
| cg05313153 | 8   | 119122430 | N_Shore       | EXT1         | 133.943761  | 0.0002   | 0.040596 |
| cg10011495 | 22  | 46516475  | N_Shore       | NA           | 24.5774618  | 0.0002   | 0.040596 |
| cg16744741 | 4   | 82126025  | Other         | PRKG2        | -47.421629  | 0.0002   | 0.040596 |
| cg01796676 | 15  | 73680284  | Other         | NA           | -70.72289   | 0.0002   | 0.040596 |
| cg18746336 | 3   | 128216122 | Island        | GATA2        | 27.6108583  | 0.0002   | 0.040596 |
| cg12416304 | 2   | 134884764 | Other         | MIR3679      | -51.003151  | 0.000201 | 0.04065  |
| cg07834743 | 5   | 5139610   | Island        | ADAMTS16     | 90.8488985  | 0.000201 | 0.04065  |
| cg17189778 | X   | 153169823 | Other         | AVPR2        | -53.967613  | 0.000201 | 0.04065  |
| cg13486600 | 1   | 22977618  | S_Shelf       | C1QB         | -117.51525  | 0.000201 | 0.04065  |
| cg17216243 | 2   | 170627694 | S_Shelf       | NA           | -29.980528  | 0.000201 | 0.04065  |
| cg05143345 | 14  | 23447408  | N_Shelf       | AJUBA        | 33.4380392  | 0.000201 | 0.04065  |
| cg00446046 | 3   | 187686918 | Other         | NA           | -32.077304  | 0.000202 | 0.040707 |

Supplemental Table 1. 2,573 BMI-Associated Methylation Sites in the Normal Breast Study, adjusting for age, race, and alcohol use

| Probe      | CHR | MAPINFO   | CPG Location* | Gene     | Coefficient | p-value  | q-value  |
|------------|-----|-----------|---------------|----------|-------------|----------|----------|
| cg14622819 | 4   | 76944817  | Other         | CXCL10   | -37.876903  | 0.000202 | 0.040707 |
| cg01844235 | 22  | 23487969  | Island        | RAB36    | 53.0031369  | 0.000202 | 0.040707 |
| cg22332722 | 18  | 25754857  | N_Shore       | CDH2     | -40.749619  | 0.000202 | 0.040707 |
| cg03106245 | 11  | 47399980  | Island        | SPI1     | -64.021398  | 0.000202 | 0.040707 |
| cg19675731 | 1   | 202129192 | Other         | PTPN7    | -41.62985   | 0.000203 | 0.040732 |
| cg25654652 | 8   | 22423633  | Island        | SORBS3   | 73.1187774  | 0.000203 | 0.040732 |
| cg22110896 | 17  | 59533081  | Island        | TBX4     | -39.317581  | 0.000203 | 0.040732 |
| cg20577613 | 17  | 57409092  | Island        | YPEL2    | 1551.29939  | 0.000203 | 0.040732 |
| cg11637721 | 11  | 65486928  | N_Shore       | RNASEH2C | 36.0550184  | 0.000203 | 0.040732 |
| cg10007927 | 6   | 32095148  | N_Shelf       | ATF6B    | 70.2629538  | 0.000203 | 0.04076  |
| cg27208925 | 16  | 85937106  | Other         | IRF8     | -50.478026  | 0.000204 | 0.040837 |
| cg09699056 | 17  | 79503642  | Island        | FSCN2    | -24.528014  | 0.000204 | 0.040856 |
| cg07183637 | 6   | 31940692  | S_Shore       | DOM3Z    | 43.7337234  | 0.000204 | 0.040913 |
| cg24788483 | 10  | 114911652 | Other         | TCF7L2   | -41.748636  | 0.000205 | 0.040924 |
| cg01477933 | 12  | 122922107 | Other         | NA       | 34.6507105  | 0.000205 | 0.040924 |
| cg03137071 | 8   | 49496369  | Other         | NA       | 41.6100372  | 0.000205 | 0.040924 |
| cg18801806 | 11  | 118869385 | S_Shore       | CCDC84   | 50.7222559  | 0.000205 | 0.040924 |
| cg03335246 | 4   | 4860431   | N_Shore       | MSX1     | -41.424681  | 0.000205 | 0.040924 |
| cg00112685 | 19  | 11591190  | Island        | ELAVL3   | 60.0112478  | 0.000205 | 0.040924 |
| cg18236464 | 1   | 176528783 | Other         | PAPPA2   | -30.287831  | 0.000206 | 0.040924 |
| cg07641643 | 12  | 123234584 | N_Shelf       | DENR     | 38.6747226  | 0.000206 | 0.040956 |
| cg04605980 | 12  | 117471700 | Other         | NA       | 42.1308018  | 0.000206 | 0.04098  |
| cg27482619 | 10  | 30818479  | Other         | NA       | -58.101769  | 0.000207 | 0.04113  |
| cg23006227 | 4   | 174423637 | S_Shore       | NA       | -22.010857  | 0.000207 | 0.041131 |
| cg15059065 | 19  | 17354961  | N_Shore       | NR2F6    | 46.2037845  | 0.000207 | 0.041131 |
| cg23114262 | 10  | 135086817 | N_Shelf       | ADAM8    | -36.100535  | 0.000207 | 0.041131 |
| cg11523350 | 11  | 117171073 | Other         | BACE1    | 29.1642469  | 0.000208 | 0.041201 |
| cg09632271 | 4   | 68441222  | Other         | STAP1    | -23.879838  | 0.000209 | 0.041312 |
| cg23827488 | 6   | 24908452  | N_Shelf       | FAM65B   | -33.175586  | 0.000209 | 0.041312 |
| cg17054708 | 3   | 13679636  | S_Shore       | FBLN2    | -53.393529  | 0.000209 | 0.041312 |
| cg15990632 | 1   | 157983193 | Other         | KIRREL   | 44.1795805  | 0.000209 | 0.041367 |
| cg13829419 | 6   | 143167279 | Other         | HIVEP2   | 49.9520935  | 0.00021  | 0.041367 |
| cg14285050 | 1   | 40778294  | N_Shelf       | COL9A2   | -59.254657  | 0.00021  | 0.041367 |
| cg04022194 | 4   | 8317995   | Other         | NA       | 83.9733658  | 0.00021  | 0.041367 |
| cg02533173 | 19  | 15391124  | Other         | BRD4     | 33.5859865  | 0.00021  | 0.041367 |
| cg01357222 | 6   | 137619143 | Other         | NA       | -31.675216  | 0.00021  | 0.041367 |
| cg16310003 | 12  | 122297080 | Other         | HPD      | 40.4741245  | 0.00021  | 0.041367 |
| cg25581039 | 17  | 7350881   | S_Shelf       | CHRNB1   | -84.464301  | 0.000211 | 0.041442 |
| cg11859982 | 7   | 127907529 | N_Shelf       | NA       | 41.5081511  | 0.000211 | 0.041496 |
| cg11700584 | 14  | 50088544  | S_Shore       | MGAT2    | 71.4686003  | 0.000212 | 0.041496 |
| cg03049917 | 15  | 88752391  | Other         | NTRK3    | -93.455914  | 0.000212 | 0.041496 |

Supplemental Table 1. 2,573 BMI-Associated Methylation Sites in the Normal Breast Study, adjusting for age, race, and alcohol use

| Probe      | CHR | MAPINFO   | CPG Location* | Gene          | Coefficient | p-value  | q-value  |
|------------|-----|-----------|---------------|---------------|-------------|----------|----------|
| cg09376835 | 8   | 131347294 | Other         | ASAP1         | -41.641056  | 0.000212 | 0.041496 |
| cg00733683 | 19  | 1244464   | S_Shore       | ATP5D         | 40.1507486  | 0.000212 | 0.041496 |
| cg06638023 | 19  | 59030102  | N_Shore       | ZBTB45        | 88.9756692  | 0.000212 | 0.041496 |
| cg13146517 | 11  | 560935    | Island        | RASSF7        | 103.111371  | 0.000213 | 0.041496 |
| cg12414070 | 12  | 117627133 | N_Shore       | FBXO21        | 45.7475896  | 0.000213 | 0.041496 |
| cg13506158 | 3   | 191048377 | S_Shore       | UTS2B         | 28.0361122  | 0.000213 | 0.041496 |
| cg06358171 | 1   | 54822008  | Island        | SSBP3         | -45.084266  | 0.000213 | 0.041496 |
| cg15988010 | 4   | 166033722 | Island        | TMEM192       | 659.632432  | 0.000213 | 0.041496 |
| cg16337763 | 11  | 11438208  | Other         | GALNT18       | -36.275459  | 0.000213 | 0.041496 |
| cg10413136 | 4   | 8207119   | Other         | SH3TC1        | -45.44666   | 0.000213 | 0.041496 |
| cg14413904 | 10  | 62423377  | Other         | ANK3          | -40.58738   | 0.000213 | 0.041496 |
| cg13407335 | 17  | 7832852   | Island        | KCNAB3        | 30.744267   | 0.000214 | 0.041496 |
| cg15705865 | 2   | 900218    | Other         | NA            | -19.525208  | 0.000214 | 0.041496 |
| cg00465073 | 18  | 48252314  | N_Shelf       | MAPK4         | -69.917507  | 0.000214 | 0.041496 |
| cg03036373 | 14  | 37051902  | N_Shore       | NKX2-8        | 114.362954  | 0.000214 | 0.041496 |
| cg21090033 | 3   | 196065357 | Other         | TM4SF19-TCTEX | -36.672227  | 0.000214 | 0.041496 |
| cg01473602 | 12  | 77257301  | Other         | CSR2          | 25.9742483  | 0.000214 | 0.041496 |
| cg04826345 | 13  | 22615334  | Other         | NA            | -68.495381  | 0.000214 | 0.041496 |
| cg27145098 | 16  | 29206563  | Other         | NA            | 25.3769071  | 0.000214 | 0.041509 |
| cg05241536 | 10  | 121298236 | N_Shelf       | RGS10         | -62.5       | 0.000215 | 0.041509 |
| cg24757778 | 10  | 60616392  | Other         | NA            | 36.8202731  | 0.000215 | 0.041509 |
| cg19513727 | 12  | 110708125 | Other         | NA            | 40.2743871  | 0.000215 | 0.041509 |
| cg22339338 | 1   | 159891638 | N_Shelf       | TAGLN2        | -29.714605  | 0.000215 | 0.041509 |
| cg11000707 | 6   | 42988922  | N_Shore       | RRP36         | 45.3490635  | 0.000215 | 0.041509 |
| cg27366072 | 12  | 12222913  | Other         | BCL2L14       | -67.727072  | 0.000215 | 0.041509 |
| cg01956472 | 6   | 33968002  | Other         | MIR1275       | -84.153818  | 0.000216 | 0.041509 |
| cg22235407 | 15  | 66209223  | Other         | MEGF11        | 38.9005749  | 0.000216 | 0.041509 |
| cg01071159 | 2   | 129492198 | N_Shelf       | NA            | -53.13544   | 0.000216 | 0.041509 |
| cg13855715 | 2   | 177430491 | Other         | NA            | -82.083546  | 0.000216 | 0.04153  |
| cg24847230 | 17  | 46986807  | S_Shore       | UBE2Z         | 64.6067052  | 0.000217 | 0.041582 |
| cg23647768 | 11  | 1054538   | N_Shore       | NA            | 43.5386021  | 0.000217 | 0.041582 |
| cg10640072 | 8   | 99985888  | Island        | NA            | -41.864178  | 0.000217 | 0.041606 |
| cg14395885 | 9   | 130700923 | S_Shore       | DPM2          | 22.9034259  | 0.000217 | 0.041606 |
| cg24910112 | 8   | 37657824  | S_Shore       | GPR124        | 32.6599147  | 0.000218 | 0.041606 |
| cg24540710 | 17  | 48262937  | Other         | COL1A1        | 57.1051721  | 0.000218 | 0.041606 |
| cg26686361 | 16  | 85964073  | Other         | NA            | -35.46069   | 0.000218 | 0.041606 |
| cg20931951 | 1   | 12508122  | Other         | VPS13D        | 33.2584018  | 0.000218 | 0.041606 |
| cg17500228 | 5   | 448790    | Other         | EXOC3         | -34.022427  | 0.000218 | 0.041606 |
| cg10420527 | 11  | 68138505  | Other         | LRP5          | -31.210027  | 0.000218 | 0.041606 |
| cg02869653 | 22  | 39352432  | Other         | APOBEC3A_B    | -449.87554  | 0.000218 | 0.041606 |
| cg12123728 | 14  | 65457053  | S_Shelf       | FNTB          | -58.97607   | 0.000218 | 0.041606 |

Supplemental Table 1. 2,573 BMI-Associated Methylation Sites in the Normal Breast Study, adjusting for age, race, and alcohol use

| Probe      | CHR | MAPINFO   | CPG Location* | Gene      | Coefficient | p-value  | q-value  |
|------------|-----|-----------|---------------|-----------|-------------|----------|----------|
| cg14737287 | 11  | 130340832 | N_Shelf       | ADAMTS15  | -126.28956  | 0.000218 | 0.041606 |
| cg27134322 | 8   | 1900778   | Other         | ARHGEF10  | -52.95362   | 0.000219 | 0.041674 |
| cg09307704 | 8   | 140277097 | Other         | NA        | 81.3365164  | 0.000219 | 0.041674 |
| cg05868813 | 13  | 26594483  | Other         | ATP8A2    | -25.728827  | 0.000219 | 0.041674 |
| cg20065005 | 1   | 16712408  | Other         | SZRD1     | -72.056844  | 0.000219 | 0.041674 |
| cg21191255 | 11  | 698760    | S_Shelf       | DEAF1     | 57.1449545  | 0.00022  | 0.041674 |
| cg08989290 | 16  | 615782    | Island        | NHLRC4    | 28.0465936  | 0.00022  | 0.041674 |
| cg21953058 | 15  | 41309253  | Other         | INO80     | -34.572237  | 0.00022  | 0.041674 |
| cg26972614 | 11  | 71710885  | Other         | IL18BP    | 33.5964367  | 0.00022  | 0.041674 |
| cg20580294 | 10  | 7486967   | Other         | NA        | -82.226418  | 0.00022  | 0.041674 |
| cg04494750 | 7   | 100304693 | S_Shore       | POP7      | 37.2493225  | 0.00022  | 0.041674 |
| cg09434536 | 15  | 70614790  | Other         | NA        | -80.416196  | 0.00022  | 0.041674 |
| cg05563033 | 13  | 101174060 | Other         | PCCA      | -330.90025  | 0.000221 | 0.041674 |
| cg04947052 | 2   | 128430937 | N_Shore       | LIMS2     | -21.860765  | 0.000221 | 0.041674 |
| cg20240860 | 11  | 44087423  | N_Shore       | ACCS      | 112.350609  | 0.000221 | 0.041674 |
| cg00880290 | 19  | 14550999  | N_Shore       | PKN1      | -21.428769  | 0.000221 | 0.041674 |
| cg01742905 | 11  | 88071023  | Island        | CTSC      | 696.837359  | 0.000221 | 0.041674 |
| cg19769147 | 14  | 105860954 | N_Shelf       | TEX22     | -36.982549  | 0.000221 | 0.041674 |
| cg08922603 | 4   | 4763690   | Other         | NA        | -177.21035  | 0.000222 | 0.041674 |
| cg00524561 | 12  | 125197665 | Other         | NA        | -22.769097  | 0.000222 | 0.041674 |
| cg09740468 | 6   | 3025325   | Other         | HTATSF1P2 | -21.601677  | 0.000222 | 0.041674 |
| cg21337881 | 17  | 5138645   | Other         | SCIMP     | -55.219493  | 0.000222 | 0.041678 |
| cg09309261 | 12  | 113906999 | N_Shore       | LHX5      | 74.3567624  | 0.000222 | 0.041678 |
| cg13074682 | 15  | 40113167  | Other         | GPR176    | -51.215701  | 0.000222 | 0.041696 |
| cg14218233 | 1   | 230276786 | Other         | GALNT2    | -72.802115  | 0.000222 | 0.041696 |
| cg24094775 | 6   | 41704688  | S_Shore       | TFEB      | 76.0134314  | 0.000223 | 0.041792 |
| cg04880990 | 12  | 52887566  | Other         | KRT6A     | -50.655029  | 0.000223 | 0.041792 |
| cg09243909 | 16  | 53871485  | Other         | FTO       | 30.7576874  | 0.000223 | 0.041792 |
| cg13576330 | 5   | 92943267  | S_Shelf       | MIR548AO  | -33.962901  | 0.000224 | 0.041792 |
| cg12319143 | 10  | 134726771 | N_Shelf       | TTC40     | -27.699663  | 0.000224 | 0.041792 |
| cg12532266 | 5   | 132201652 | N_Shore       | UQCRQ     | 26.2417034  | 0.000224 | 0.041792 |
| cg04883269 | 3   | 127144483 | Other         | NA        | -73.588432  | 0.000224 | 0.041792 |
| cg09603795 | 10  | 75256221  | S_Shore       | PPP3CB    | 42.9995789  | 0.000224 | 0.041792 |
| cg08575883 | 10  | 3291355   | Other         | NA        | 37.521414   | 0.000224 | 0.041792 |
| cg14524724 | 5   | 173054985 | Other         | NA        | 31.0592349  | 0.000224 | 0.041792 |
| cg02756056 | 6   | 32813582  | S_Shore       | PSMB8     | -43.78994   | 0.000225 | 0.041792 |
| cg09524658 | 3   | 129272656 | Other         | NA        | -14.634996  | 0.000225 | 0.041792 |
| cg01209296 | 20  | 62435316  | S_Shore       | ZBTB46    | -42.787284  | 0.000225 | 0.04182  |
| cg17951588 | 2   | 239951254 | Other         | NA        | -146.57523  | 0.000225 | 0.04182  |
| cg09235217 | 2   | 232263030 | Island        | B3GNT7    | -172.3083   | 0.000225 | 0.04182  |
| cg26974880 | 16  | 50308058  | Other         | NA        | -48.666456  | 0.000226 | 0.04182  |

Supplemental Table 1. 2,573 BMI-Associated Methylation Sites in the Normal Breast Study, adjusting for age, race, and alcohol use

| Probe      | CHR | MAPINFO   | CPG Location* | Gene         | Coefficient | p-value  | q-value  |
|------------|-----|-----------|---------------|--------------|-------------|----------|----------|
| cg06879786 | 2   | 218847598 | S_Shelf       | NA           | -87.561559  | 0.000226 | 0.04182  |
| cg02679503 | 2   | 42794680  | N_Shore       | MTA3         | 22.4494359  | 0.000226 | 0.04182  |
| cg24553170 | 1   | 49243472  | S_Shore       | BEND5        | 32.2677144  | 0.000227 | 0.041921 |
| cg27436940 | 17  | 43047115  | N_Shore       | C1QL1        | -32.011418  | 0.000227 | 0.041921 |
| cg21781157 | 20  | 47874111  | Other         | ZNFX1        | -56.004835  | 0.000227 | 0.041921 |
| cg08120210 | 15  | 66682733  | S_Shelf       | MAP2K1       | -18.877759  | 0.000227 | 0.041924 |
| cg20211629 | 18  | 48352490  | Other         | MRO          | -42.904894  | 0.000227 | 0.041924 |
| cg27507261 | 17  | 5403053   | N_Shore       | LOC728392    | 38.0631816  | 0.000227 | 0.041924 |
| cg18124162 | 13  | 109616351 | Other         | MYO16        | -83.978337  | 0.000227 | 0.041924 |
| cg02424715 | 14  | 75893680  | N_Shore       | JDP2         | -46.46205   | 0.000228 | 0.041924 |
| cg16659773 | 6   | 4352453   | Other         | NA           | 40.2376134  | 0.000228 | 0.041924 |
| cg15693483 | 7   | 1102177   | N_Shelf       | C7orf50      | -69.578355  | 0.000228 | 0.041993 |
| cg18263969 | 17  | 76970864  | Other         | LGALS3BP     | 48.4712257  | 0.000228 | 0.042009 |
| cg02956248 | 6   | 32120901  | N_Shore       | PPT2         | 45.1989766  | 0.000229 | 0.042018 |
| cg24847621 | 6   | 30122565  | Other         | TRIM10       | 25.7012956  | 0.000229 | 0.042018 |
| cg19680631 | 6   | 170478454 | S_Shelf       | NA           | -101.12942  | 0.000229 | 0.042042 |
| cg06629120 | 3   | 197181773 | N_Shore       | NA           | -45.116291  | 0.000229 | 0.042042 |
| cg01768328 | 17  | 1634018   | N_Shelf       | WDR81        | 73.4095223  | 0.00023  | 0.042127 |
| cg06885823 | 5   | 82675005  | Other         | NA           | -63.028973  | 0.00023  | 0.042168 |
| cg07576135 | 15  | 42694403  | Other         | CAPN3        | -57.262692  | 0.000231 | 0.042185 |
| cg07636338 | 19  | 46214108  | N_Shore       | FBXO46       | 36.9500942  | 0.000231 | 0.042185 |
| cg15817960 | 12  | 54409599  | S_Shore       | HOXC4        | -30.704105  | 0.000231 | 0.042185 |
| cg20748065 | 7   | 75583421  | Other         | POR          | -35.72998   | 0.000231 | 0.042185 |
| cg16577789 | 14  | 94186558  | Other         | PRIMA1       | -59.392149  | 0.000231 | 0.042185 |
| cg06354695 | 1   | 212643521 | Other         | NA           | 25.1608164  | 0.000231 | 0.042185 |
| cg13152501 | 7   | 98626398  | Other         | SMURF1       | -46.587943  | 0.000231 | 0.042185 |
| cg17718899 | 13  | 22773018  | Other         | NA           | 24.6412531  | 0.000231 | 0.042185 |
| cg01226614 | 13  | 44947593  | Island        | SERP2        | 39.3758059  | 0.000232 | 0.042185 |
| cg24200165 | 13  | 111658907 | Other         | NA           | 51.7234381  | 0.000232 | 0.042232 |
| cg14972827 | 6   | 17045947  | Other         | NA           | 31.0298788  | 0.000232 | 0.042232 |
| cg12689803 | 12  | 119519948 | Other         | SRRM4        | 27.8007528  | 0.000232 | 0.042232 |
| cg01045337 | 16  | 374988    | Island        | AXIN1        | -25.192062  | 0.000232 | 0.042232 |
| cg19874640 | 5   | 134527449 | S_Shore       | LOC100996485 | -89.092786  | 0.000233 | 0.042232 |
| cg17379666 | 17  | 71304784  | N_Shelf       | CDC42EP4     | 27.9541953  | 0.000233 | 0.042256 |
| cg25600446 | 8   | 145728543 | N_Shore       | GPT          | 41.2225348  | 0.000233 | 0.042256 |
| cg18615369 | 13  | 52701033  | N_Shore       | NEK5         | -57.350957  | 0.000233 | 0.042268 |
| cg16549994 | 22  | 36854045  | S_Shelf       | NA           | 60.2104725  | 0.000233 | 0.042269 |
| cg14086822 | 1   | 2724609   | Other         | NA           | 38.4280274  | 0.000234 | 0.042358 |
| cg16577665 | 1   | 119702694 | Other         | NA           | 35.2586604  | 0.000234 | 0.042358 |
| cg05469614 | 16  | 3142818   | S_Shelf       | ZSCAN10      | 58.0727378  | 0.000234 | 0.042358 |
| cg00489485 | 16  | 84341364  | Other         | WFDC1        | -99.080658  | 0.000235 | 0.042358 |

Supplemental Table 1. 2,573 BMI-Associated Methylation Sites in the Normal Breast Study, adjusting for age, race, and alcohol use

| Probe      | CHR | MAPINFO   | CPG Location* | Gene      | Coefficient | p-value  | q-value  |
|------------|-----|-----------|---------------|-----------|-------------|----------|----------|
| cg01123186 | 17  | 36514710  | Other         | SOCS7     | 29.7005065  | 0.000235 | 0.042358 |
| cg22758834 | 7   | 95222104  | N_Shelf       | PDK4      | -16.580078  | 0.000235 | 0.042358 |
| cg02240622 | 15  | 40601467  | Other         | PLCB2     | -54.675462  | 0.000235 | 0.042358 |
| cg02926868 | 11  | 66374763  | Other         | NA        | 23.3244871  | 0.000235 | 0.042358 |
| cg22878535 | 17  | 78431627  | S_Shelf       | NA        | -60.562681  | 0.000235 | 0.042358 |
| cg09794469 | 7   | 5391393   | Island        | TNRC18    | 22.2494879  | 0.000236 | 0.042404 |
| cg11105029 | 20  | 2362041   | Other         | TGM6      | 81.8780494  | 0.000236 | 0.042404 |
| cg06126421 | 6   | 30720080  | Other         | NA        | 23.4651251  | 0.000236 | 0.042422 |
| cg13314778 | 3   | 70889448  | Other         | NA        | -30.687506  | 0.000236 | 0.042422 |
| cg04760574 | 10  | 101989519 | Island        | CHUK      | 305.388229  | 0.000236 | 0.042422 |
| cg19379721 | 19  | 19737143  | N_Shore       | LPAR2     | -104.83091  | 0.000236 | 0.042422 |
| cg00728848 | 6   | 13483832  | N_Shelf       | GFOD1     | -34.244463  | 0.000237 | 0.042426 |
| cg27129590 | 12  | 116351979 | N_Shelf       | NA        | -63.939873  | 0.000238 | 0.042494 |
| cg14135809 | 9   | 140502926 | S_Shelf       | ARRDC1    | -45.357008  | 0.000238 | 0.042494 |
| cg00726046 | 20  | 43161260  | S_Shore       | PKIG      | 43.5430439  | 0.000238 | 0.042494 |
| cg11381282 | 13  | 20763366  | N_Shelf       | GJB2      | -61.067706  | 0.000238 | 0.042494 |
| cg03388575 | 7   | 1765158   | Other         | ELFN1     | 46.0886858  | 0.000238 | 0.042559 |
| cg08734931 | 10  | 14051649  | Other         | FRMD4A    | 37.3618052  | 0.000238 | 0.042559 |
| cg22969108 | 12  | 15983280  | Other         | NA        | 32.1472305  | 0.000239 | 0.042592 |
| cg08447387 | 8   | 131369596 | N_Shore       | ASAP1     | 48.8994215  | 0.000239 | 0.042604 |
| cg23089425 | 8   | 19034837  | Other         | NA        | 32.1833009  | 0.000239 | 0.042643 |
| cg14177325 | 17  | 1541763   | S_Shelf       | SCARF1    | -95.880758  | 0.000239 | 0.042643 |
| cg24716167 | 10  | 134545286 | Other         | INPP5A    | -87.037757  | 0.00024  | 0.042643 |
| cg21969792 | 4   | 1594995   | N_Shore       | NA        | 36.3604622  | 0.00024  | 0.042643 |
| cg13027206 | 14  | 91866325  | Other         | CCDC88C   | -58.259492  | 0.00024  | 0.042673 |
| cg25450034 | X   | 129806493 | Other         | ENOX2     | 51.6891793  | 0.000241 | 0.042673 |
| cg01353907 | 12  | 131438283 | Other         | GPR133    | 18.2021618  | 0.000241 | 0.042673 |
| cg08651590 | 2   | 65543410  | S_Shelf       | SPRED2    | 26.7028027  | 0.000241 | 0.042673 |
| cg05002190 | 19  | 2926196   | N_Shore       | NA        | 54.3292772  | 0.000241 | 0.042673 |
| cg21017569 | 17  | 7832769   | Island        | KCNAB3    | 43.9204286  | 0.000241 | 0.042673 |
| cg08949143 | 13  | 30947713  | Other         | LINC00426 | -67.092549  | 0.000241 | 0.042673 |
| cg00537673 | 6   | 43141823  | N_Shore       | SRF       | 39.0268679  | 0.000241 | 0.042673 |
| cg23922724 | 11  | 76474735  | Other         | NA        | 30.9122391  | 0.000241 | 0.042673 |
| cg25813942 | 18  | 2843518   | N_Shelf       | EMILIN2   | -55.058682  | 0.000241 | 0.042673 |
| cg08572757 | 12  | 125582465 | S_Shelf       | AACS      | -36.774569  | 0.000242 | 0.042673 |
| cg16346422 | 11  | 2920819   | N_Shelf       | SLC22A18  | -29.310606  | 0.000242 | 0.042673 |
| cg20450689 | 18  | 77586147  | Island        | NA        | -24.001604  | 0.000242 | 0.042673 |
| cg11643457 | 12  | 80904153  | Other         | PTPRQ     | 45.8392534  | 0.000242 | 0.042673 |
| cg16652392 | 1   | 1826227   | S_Shelf       | GNB1      | 37.2475904  | 0.000242 | 0.042732 |
| cg07889826 | 3   | 50127152  | Island        | RBM5      | 339.641518  | 0.000243 | 0.042749 |
| cg18009496 | 5   | 1883940   | Island        | IRX4      | 533.743776  | 0.000243 | 0.042775 |

Supplemental Table 1. 2,573 BMI-Associated Methylation Sites in the Normal Breast Study, adjusting for age, race, and alcohol use

| Probe      | CHR | MAPINFO   | CPG Location* | Gene     | Coefficient | p-value  | q-value  |
|------------|-----|-----------|---------------|----------|-------------|----------|----------|
| cg08215318 | 16  | 86016387  | Other         | NA       | -41.831108  | 0.000243 | 0.042797 |
| cg04586023 | 22  | 50690380  | S_Shore       | HDAC10   | -51.587964  | 0.000244 | 0.042931 |
| cg23502883 | 15  | 93959149  | Other         | NA       | -70.335377  | 0.000245 | 0.042993 |
| cg25103895 | 10  | 64565642  | Island        | ADO      | 33.242989   | 0.000245 | 0.042993 |
| cg21188037 | 7   | 45018658  | Other         | MYO1G    | -50.494997  | 0.000245 | 0.042993 |
| cg23251761 | 1   | 9750061   | Island        | PIK3CD   | 30.1320009  | 0.000245 | 0.043007 |
| cg06796779 | 3   | 128204927 | N_Shore       | GATA2    | 41.8865065  | 0.000246 | 0.043031 |
| cg20510285 | 6   | 11263797  | Other         | NEDD9    | 69.5159023  | 0.000246 | 0.043031 |
| cg02932355 | 8   | 102184648 | Other         | NA       | 29.1492842  | 0.000246 | 0.043048 |
| cg26217572 | 13  | 27540240  | Other         | NA       | 44.6784793  | 0.000247 | 0.043048 |
| cg12974599 | 22  | 46770195  | N_Shore       | CELSR1   | -25.702975  | 0.000247 | 0.043048 |
| cg14365457 | 9   | 124029877 | Other         | GSN      | -68.449753  | 0.000247 | 0.043048 |
| cg01138020 | 17  | 4337094   | Other         | SPNS3    | -33.975625  | 0.000247 | 0.043048 |
| cg10504436 | 22  | 24180492  | Island        | DERL3    | -38.953441  | 0.000247 | 0.043048 |
| cg08599824 | 7   | 67189164  | Other         | NA       | -85.136901  | 0.000247 | 0.043048 |
| cg14072027 | 17  | 15301904  | Other         | NA       | -27.658365  | 0.000248 | 0.043048 |
| cg17796461 | 15  | 31685823  | Island        | NA       | -50.752936  | 0.000248 | 0.043048 |
| cg26083045 | 3   | 8560168   | Other         | LMCD1    | -77.730993  | 0.000248 | 0.043048 |
| cg17111087 | 1   | 167407514 | N_Shore       | CD247    | -53.897115  | 0.000248 | 0.043048 |
| cg21477232 | 2   | 227994951 | Other         | COL4A4   | -80.679015  | 0.000248 | 0.043048 |
| cg20522104 | 11  | 83251615  | Other         | DLG2     | -45.571042  | 0.000248 | 0.043048 |
| cg02363766 | 5   | 2008270   | Island        | NA       | 31.9610066  | 0.000248 | 0.043048 |
| cg14699867 | 12  | 106994421 | Other         | RFX4     | -290.50809  | 0.000248 | 0.043051 |
| cg23694605 | 11  | 120044146 | S_Shelf       | NA       | 44.7811525  | 0.000248 | 0.043051 |
| cg07554664 | 16  | 68431982  | Other         | SMPD3    | 65.9779181  | 0.000249 | 0.043051 |
| cg01329756 | 17  | 80346912  | Island        | NA       | -52.027612  | 0.000249 | 0.043051 |
| cg26340968 | 19  | 3798367   | N_Shelf       | MATK     | -35.747627  | 0.000249 | 0.043051 |
| cg00184457 | 8   | 8946301   | Other         | NA       | -24.24621   | 0.000249 | 0.043051 |
| cg13084345 | 1   | 36948733  | Other         | CSF3R    | -58.850132  | 0.000249 | 0.043051 |
| cg12217560 | 13  | 24144900  | Other         | TNFRSF19 | 18.1567631  | 0.00025  | 0.043084 |
| cg26933869 | 1   | 19218007  | Other         | ALDH4A1  | -59.255842  | 0.00025  | 0.043084 |
| cg02452552 | 5   | 150618048 | Other         | NA       | 23.156066   | 0.00025  | 0.043084 |
| cg11386011 | 6   | 32121156  | N_Shore       | PPT2     | 26.2009782  | 0.00025  | 0.043084 |
| cg05323324 | 3   | 194120023 | S_Shore       | GP5      | -23.506305  | 0.00025  | 0.043084 |
| cg20442379 | 10  | 60024634  | N_Shelf       | IPMK     | -32.376769  | 0.00025  | 0.043084 |
| cg05641529 | 4   | 100242957 | Other         | ADH1B    | -21.056607  | 0.000251 | 0.043084 |
| cg09920804 | 8   | 42053994  | Other         | PLAT     | 45.4627889  | 0.000251 | 0.043084 |
| cg11361344 | 2   | 220361467 | Island        | GMPPA    | -20.845332  | 0.000251 | 0.043084 |
| cg21400549 | 1   | 212588848 | Other         | TMEM206  | -78.101047  | 0.000251 | 0.043084 |
| cg16846069 | 12  | 6462681   | S_Shore       | SCNN1A   | -43.500345  | 0.000251 | 0.043084 |
| cg18516365 | 10  | 111721749 | Other         | ADD3-AS1 | 53.1093984  | 0.000252 | 0.043145 |

Supplemental Table 1. 2,573 BMI-Associated Methylation Sites in the Normal Breast Study, adjusting for age, race, and alcohol use

| Probe      | CHR | MAPINFO   | CPG Location* | Gene         | Coefficient | p-value  | q-value  |
|------------|-----|-----------|---------------|--------------|-------------|----------|----------|
| cg27462969 | 1   | 67896192  | Island        | SERBP1       | 191.604052  | 0.000252 | 0.043145 |
| cg25349990 | 1   | 229294380 | Other         | NA           | -35.93468   | 0.000252 | 0.043188 |
| cg00931520 | 16  | 1231484   | S_Shore       | CACNA1H      | 55.5671797  | 0.000252 | 0.043193 |
| cg10929387 | 3   | 52864659  | Other         | ITIH4        | 30.6169901  | 0.000252 | 0.043203 |
| cg07924703 | 8   | 22423020  | Island        | SORBS3       | 112.531278  | 0.000253 | 0.043203 |
| cg04821959 | 12  | 106900710 | Other         | POLR3B       | -61.061614  | 0.000253 | 0.043274 |
| cg19802165 | 5   | 134370033 | Island        | PITX1        | 2312.22292  | 0.000253 | 0.043274 |
| cg22213622 | 12  | 22090730  | N_Shelf       | ABCC9        | -52.124293  | 0.000254 | 0.043389 |
| cg03750034 | 8   | 94430696  | Other         | LINC00535    | -113.5341   | 0.000254 | 0.043389 |
| cg24295653 | 3   | 61237884  | S_Shore       | FHIT         | 52.542742   | 0.000255 | 0.043447 |
| cg04172497 | 11  | 59382296  | N_Shore       | OSBP         | 83.1937382  | 0.000255 | 0.043473 |
| cg09449150 | 11  | 129731815 | Other         | NA           | 53.8221671  | 0.000255 | 0.043509 |
| cg05754058 | 7   | 41094211  | Other         | NA           | -41.999976  | 0.000256 | 0.043509 |
| cg26146988 | 14  | 102034601 | S_Shelf       | NA           | 36.8596123  | 0.000256 | 0.04352  |
| cg07120544 | 8   | 93076082  | Other         | RUNX1T1      | 31.0533433  | 0.000256 | 0.04352  |
| cg21012737 | 14  | 105393171 | Other         | PLD4         | -46.16149   | 0.000256 | 0.04352  |
| cg08749735 | 17  | 16488023  | S_Shore       | NA           | 55.6002148  | 0.000256 | 0.04352  |
| cg03421236 | 16  | 49486155  | Other         | NA           | -29.621398  | 0.000257 | 0.04352  |
| cg21871050 | 13  | 24269500  | Island        | NA           | -96.093832  | 0.000257 | 0.04352  |
| cg19522050 | 10  | 101281275 | Island        | NA           | 54.1199276  | 0.000257 | 0.04352  |
| cg03978682 | 5   | 53411773  | Other         | ARL15        | -61.74292   | 0.000257 | 0.04352  |
| cg26588061 | 10  | 12086036  | S_Shore       | UPF2         | -67.39085   | 0.000257 | 0.04352  |
| cg11841649 | 5   | 131989505 | N_Shelf       | IL13         | 23.328614   | 0.000257 | 0.04352  |
| cg03845683 | 11  | 64933489  | Other         | SPDYC        | 32.2919948  | 0.000257 | 0.04352  |
| cg03730946 | 19  | 6475456   | Island        | DENND1C      | 45.6532934  | 0.000258 | 0.04352  |
| cg20425130 | 3   | 183273245 | Other         | KLHL6        | -26.576149  | 0.000258 | 0.04352  |
| cg02793854 | 16  | 67867809  | Island        | CENPT        | 487.904811  | 0.000258 | 0.043557 |
| cg16668176 | 19  | 5308893   | Other         | PTPRS        | 26.6846123  | 0.000258 | 0.043557 |
| cg00830419 | 2   | 20371971  | Other         | NA           | 26.6847429  | 0.000259 | 0.043557 |
| cg06968164 | 13  | 45629698  | Other         | NA           | 54.7740351  | 0.000259 | 0.043557 |
| cg27141517 | 15  | 66923526  | Other         | NA           | -62.680149  | 0.000259 | 0.043557 |
| cg09739398 | 11  | 47416886  | S_Shore       | NA           | -24.949278  | 0.000259 | 0.043557 |
| cg11723077 | 6   | 158508188 | S_Shore       | SYNJ2        | -39.142001  | 0.000259 | 0.043557 |
| cg16810559 | 3   | 64090850  | Other         | PRICKLE2-AS2 | 31.261923   | 0.000259 | 0.043557 |
| cg19192626 | 17  | 38708638  | Other         | NA           | 27.7884647  | 0.000259 | 0.043557 |
| cg17541674 | 19  | 51296949  | S_Shore       | ACPT         | 48.1397127  | 0.00026  | 0.043557 |
| cg26219182 | 1   | 32687590  | Island        | TMEM234      | 479.843564  | 0.00026  | 0.043557 |
| cg16418183 | 16  | 51360402  | Other         | NA           | 39.4658353  | 0.00026  | 0.043557 |
| cg09634176 | 6   | 100037332 | Island        | NA           | 206.290094  | 0.00026  | 0.043557 |
| cg12958561 | 4   | 26460878  | Other         | NA           | 42.2536442  | 0.00026  | 0.043557 |
| cg00451635 | 16  | 10675030  | S_Shore       | EMP2         | 55.0819534  | 0.00026  | 0.043557 |

Supplemental Table 1. 2,573 BMI-Associated Methylation Sites in the Normal Breast Study, adjusting for age, race, and alcohol use

| Probe      | CHR | MAPINFO   | CPG Location* | Gene       | Coefficient | p-value  | q-value  |
|------------|-----|-----------|---------------|------------|-------------|----------|----------|
| cg04917208 | 16  | 70680104  | Other         | IL34       | 44.6397955  | 0.00026  | 0.043557 |
| cg04329382 | 22  | 46480891  | N_Shore       | MIRLET7BHG | 39.0763045  | 0.000261 | 0.043557 |
| cg07708453 | 1   | 14032034  | Other         | PRDM2      | -139.04624  | 0.000261 | 0.043557 |
| cg00387090 | 1   | 201615401 | N_Shore       | NAV1       | -27.054305  | 0.000261 | 0.043579 |
| cg11277662 | 8   | 143408047 | Island        | TSNARE1    | -56.791155  | 0.000261 | 0.043579 |
| cg07778315 | 12  | 133380627 | S_Shore       | GOLGA3     | 48.1256781  | 0.000261 | 0.043579 |
| cg20005057 | 12  | 10364834  | N_Shore       | GABARAPL1  | 105.761441  | 0.000262 | 0.043604 |
| cg16472369 | 17  | 4618322   | S_Shelf       | ARRB2      | -49.299117  | 0.000262 | 0.043604 |
| cg03473377 | 10  | 33568029  | Other         | NRP1       | -59.671124  | 0.000262 | 0.043604 |
| cg10436257 | 16  | 30959496  | Island        | ORAI3      | 32.1655243  | 0.000262 | 0.043604 |
| cg15200801 | 19  | 48999042  | N_Shore       | LMTK3      | -48.030967  | 0.000262 | 0.043604 |
| cg06988336 | 16  | 89922397  | S_Shore       | SPIRE2     | -47.2356    | 0.000263 | 0.043604 |
| cg23193059 | 11  | 116706090 | N_Shore       | APOA1      | -19.445039  | 0.000263 | 0.043604 |
| cg15348869 | 12  | 119418004 | N_Shore       | SRRM4      | 274.038968  | 0.000263 | 0.043604 |
| cg09315878 | 1   | 1152580   | Island        | TNFRSF4    | -25.307876  | 0.000263 | 0.043604 |
| cg27447296 | 2   | 27994265  | N_Shore       | MRPL33     | 95.4367383  | 0.000263 | 0.043604 |
| cg16759783 | 18  | 77746937  | N_Shore       | TXNL4A     | 37.3579659  | 0.000263 | 0.043604 |
| cg03654841 | 16  | 88615609  | Other         | NA         | 142.393526  | 0.000263 | 0.043604 |
| cg13966557 | 4   | 184908884 | Other         | STOX2      | 25.065504   | 0.000264 | 0.043725 |
| cg26785896 | 12  | 58013354  | Island        | SLC26A10   | -40.46382   | 0.000264 | 0.043725 |
| cg09447621 | 11  | 134254646 | S_Shore       | B3GAT1     | -37.301648  | 0.000265 | 0.043818 |
| cg18506124 | 19  | 35629603  | N_Shelf       | FXYD1      | 33.4595182  | 0.000265 | 0.043823 |
| cg14311559 | 12  | 7060257   | Other         | PTPN6      | -49.772101  | 0.000265 | 0.043823 |
| cg02258139 | 7   | 97841513  | N_Shore       | BHLHA15    | -99.279243  | 0.000266 | 0.043823 |
| cg10990081 | 3   | 3168142   | N_Shore       | TRNT1      | 27.4216626  | 0.000266 | 0.043901 |
| cg11287077 | 5   | 158590712 | Other         | RNF145     | 48.2386503  | 0.000267 | 0.043904 |
| cg08204162 | 8   | 22785567  | Other         | PEBP4      | 35.0619888  | 0.000267 | 0.043904 |
| cg02059317 | 16  | 89024511  | Other         | CBFA2T3    | -55.759888  | 0.000267 | 0.043904 |
| cg20267775 | 1   | 171623695 | Other         | MYOC       | 35.7485726  | 0.000267 | 0.043904 |
| cg14935646 | 7   | 27215464  | S_Shore       | HOXA10     | -30.20454   | 0.000267 | 0.043904 |
| cg27584146 | 1   | 46599915  | S_Shore       | PIK3R3     | -51.350359  | 0.000268 | 0.043904 |
| cg14088811 | 11  | 47399994  | Island        | SPI1       | -50.340408  | 0.000268 | 0.043904 |
| cg21550219 | 5   | 135394043 | Other         | TGFB1      | 33.5431549  | 0.000268 | 0.043904 |
| cg16144864 | 1   | 177244231 | Other         | FAM5B      | 37.3363266  | 0.000268 | 0.043904 |
| cg02845870 | 11  | 85524670  | S_Shelf       | SYTL2      | -72.928936  | 0.000268 | 0.043904 |
| cg23152742 | 12  | 132920884 | N_Shore       | NA         | 28.0752568  | 0.000268 | 0.043904 |
| cg03574571 | 19  | 35820181  | Other         | CD22       | -69.499244  | 0.000268 | 0.043904 |
| cg18589526 | 7   | 138575872 | Other         | KIAA1549   | 49.6621188  | 0.000269 | 0.043904 |
| cg23704627 | 22  | 39152758  | S_Shore       | SUN2       | -41.249365  | 0.000269 | 0.043904 |
| cg27175943 | 16  | 85334190  | Other         | NA         | -58.128103  | 0.000269 | 0.043904 |
| cg05227215 | 5   | 139057496 | S_Shore       | CXXC5      | 31.2606902  | 0.000269 | 0.043904 |

Supplemental Table 1. 2,573 BMI-Associated Methylation Sites in the Normal Breast Study, adjusting for age, race, and alcohol use

| Probe      | CHR | MAPINFO   | CPG Location* | Gene      | Coefficient | p-value  | q-value  |
|------------|-----|-----------|---------------|-----------|-------------|----------|----------|
| cg02699829 | 19  | 13216355  | S_Shore       | LYL1      | -46.168816  | 0.000269 | 0.043904 |
| cg09350536 | 14  | 23236725  | S_Shore       | OXA1L     | 165.779818  | 0.000269 | 0.043904 |
| cg04330176 | 10  | 105619211 | S_Shelf       | SH3PXD2A  | 40.6858998  | 0.000269 | 0.043904 |
| cg10223234 | 6   | 31926205  | N_Shore       | SKIV2L    | 46.9994456  | 0.000269 | 0.043904 |
| cg18498263 | 14  | 91034963  | Other         | TTC7B     | 21.8630453  | 0.00027  | 0.043904 |
| cg21325802 | 7   | 16948307  | Other         | NA        | -43.244536  | 0.00027  | 0.043904 |
| cg21643095 | 11  | 105009375 | Other         | CARD18    | 68.6330697  | 0.00027  | 0.043904 |
| cg04333785 | 10  | 31446813  | Other         | NA        | 35.1670675  | 0.00027  | 0.043904 |
| cg18269493 | 1   | 8772984   | Other         | RERE      | -33.503331  | 0.00027  | 0.043904 |
| cg17451138 | 12  | 124155880 | Island        | TCTN2     | 401.384345  | 0.000271 | 0.043904 |
| cg13460556 | 15  | 89709638  | Other         | ABHD2     | -15.484694  | 0.000271 | 0.043904 |
| cg26604895 | 5   | 89842121  | Other         | NA        | 40.3247221  | 0.000271 | 0.043904 |
| cg22776771 | X   | 107976903 | N_Shore       | IRS4      | 44.1608796  | 0.000271 | 0.043904 |
| cg21531685 | 3   | 73672063  | N_Shore       | PDZRN3    | 29.086415   | 0.000271 | 0.043904 |
| cg14805932 | 2   | 241401799 | Island        | GPC1      | -133.33693  | 0.000271 | 0.043904 |
| cg26633373 | 19  | 54377836  | S_Shore       | MYADM     | -34.822553  | 0.000271 | 0.043904 |
| cg14938313 | 11  | 70028676  | Other         | ANO1      | -63.737787  | 0.000271 | 0.043904 |
| cg22986569 | 5   | 2659008   | Other         | NA        | 30.7731011  | 0.000272 | 0.043904 |
| cg04204526 | 1   | 2980937   | S_Shore       | LINC00982 | 53.2500808  | 0.000272 | 0.043904 |
| cg10191684 | 8   | 22423014  | Island        | SORBS3    | 139.496933  | 0.000272 | 0.043904 |
| cg06764092 | 1   | 159796658 | Other         | SLAMF8    | -32.124064  | 0.000272 | 0.04394  |
| cg06766636 | 6   | 116598395 | N_Shelf       | TSPYL1    | 42.5303221  | 0.000273 | 0.04397  |
| cg02807984 | 11  | 722258    | S_Shore       | EPS8L2    | -35.247137  | 0.000273 | 0.04397  |
| cg03732020 | 11  | 47282968  | Other         | NR1H3     | -32.848928  | 0.000273 | 0.043985 |
| cg14213992 | 19  | 40503358  | S_Shore       | ZNF546    | 143.547902  | 0.000273 | 0.043995 |
| cg09806318 | 6   | 1383064   | Island        | NA        | -62.27088   | 0.000274 | 0.044049 |
| cg16717713 | 14  | 100069657 | Island        | CCDC85C   | -27.384735  | 0.000274 | 0.044058 |
| cg07888661 | 10  | 73759402  | Other         | CHST3     | 58.7902174  | 0.000274 | 0.044094 |
| cg23033749 | 7   | 116610238 | Other         | ST7       | -62.423327  | 0.000275 | 0.044139 |
| cg06750038 | 16  | 87425101  | N_Shore       | FBXO31    | 41.2967212  | 0.000275 | 0.044144 |
| cg11328127 | 11  | 415441    | N_Shore       | SIGIRR    | -27.113411  | 0.000275 | 0.044163 |
| cg21110337 | 12  | 113671028 | Other         | TPCN1     | -32.053929  | 0.000275 | 0.044164 |
| cg03678274 | 1   | 236017128 | Other         | MIR1537   | -29.252832  | 0.000276 | 0.044197 |
| cg05798429 | 6   | 31743928  | Other         | VWA7      | -62.191139  | 0.000276 | 0.044203 |
| cg26011438 | 17  | 1964730   | S_Shelf       | SMG6      | 69.4957505  | 0.000276 | 0.044203 |
| cg23685650 | 14  | 56045894  | N_Shore       | KTN1-AS1  | 34.8339514  | 0.000277 | 0.044203 |
| cg02776658 | 19  | 35800589  | N_Shore       | MAG       | 22.7826701  | 0.000277 | 0.044203 |
| cg02807008 | 19  | 1910258   | N_Shore       | SCAMP4    | 30.4895138  | 0.000277 | 0.044203 |
| cg03772108 | 7   | 116889900 | Other         | NA        | -79.396495  | 0.000277 | 0.044203 |
| cg03543648 | 22  | 42319809  | N_Shelf       | TNFRSF13C | -112.88361  | 0.000277 | 0.044203 |
| cg03781727 | 7   | 22007540  | Other         | NA        | -23.909137  | 0.000277 | 0.044203 |

Supplemental Table 1. 2,573 BMI-Associated Methylation Sites in the Normal Breast Study, adjusting for age, race, and alcohol use

| Probe      | CHR | MAPINFO   | CPG Location* | Gene      | Coefficient | p-value  | q-value  |
|------------|-----|-----------|---------------|-----------|-------------|----------|----------|
| cg14685146 | 17  | 42088751  | N_Shelf       | TMEM101   | 22.7525332  | 0.000277 | 0.044203 |
| cg05283597 | 3   | 52812410  | Other         | ITIH1     | -37.55075   | 0.000277 | 0.044203 |
| cg26504229 | 21  | 45149038  | Island        | PDXK      | 32.5918552  | 0.000278 | 0.044219 |
| cg23334306 | 14  | 33945217  | Other         | NPAS3     | -55.358022  | 0.000278 | 0.044249 |
| cg00580562 | 10  | 21789124  | Island        | C10orf114 | -19.846809  | 0.000278 | 0.044293 |
| cg14211332 | 1   | 117255389 | Other         | NA        | -53.647325  | 0.000278 | 0.044293 |
| cg00083659 | 22  | 37404577  | Other         | TEX33     | -22.644758  | 0.000279 | 0.044315 |
| cg07978738 | 10  | 116298339 | Other         | ABLIM1    | -55.300188  | 0.000279 | 0.044323 |
| cg01247127 | 20  | 1538366   | Other         | SIRPD     | 52.5249663  | 0.000279 | 0.044323 |
| cg21599100 | 11  | 2920437   | N_Shelf       | SLC22A18  | -74.947957  | 0.000279 | 0.044323 |
| cg06812840 | 17  | 7492524   | Island        | SOX15     | 73.6778084  | 0.00028  | 0.04434  |
| cg24761567 | 6   | 40687984  | Other         | NA        | -52.116997  | 0.00028  | 0.04434  |
| cg06638568 | 6   | 163730822 | Other         | PACRG     | -37.554426  | 0.00028  | 0.04434  |
| cg21301505 | 1   | 159796629 | Other         | SLAMF8    | -28.924237  | 0.00028  | 0.04434  |
| cg07175797 | 16  | 50317656  | Other         | ADCY7     | -50.598334  | 0.00028  | 0.04434  |
| cg13084335 | 11  | 111782670 | Other         | CRYAB     | 40.3092004  | 0.00028  | 0.04434  |
| cg00255726 | 8   | 21769114  | N_Shore       | DOK2      | -61.714973  | 0.000281 | 0.044365 |
| cg08578641 | 9   | 34457440  | Island        | FAM219A   | 30.9738191  | 0.000281 | 0.044365 |
| cg03736235 | 19  | 1071622   | Island        | HMHA1     | 38.6864661  | 0.000281 | 0.044365 |
| cg24997703 | 14  | 105969175 | S_Shelf       | NA        | 70.4618809  | 0.000281 | 0.044365 |
| cg27477250 | 19  | 12841735  | N_Shelf       | C19orf43  | 71.6989413  | 0.000282 | 0.044365 |
| cg16674248 | 22  | 46664402  | S_Shore       | TTC38     | 30.0763141  | 0.000282 | 0.044365 |
| cg23889967 | 10  | 131568313 | Other         | NA        | -72.946577  | 0.000282 | 0.044365 |
| cg11064966 | 5   | 32506514  | Other         | NA        | 82.6350905  | 0.000282 | 0.044365 |
| cg24848189 | 11  | 44338968  | S_Shore       | NA        | -57.400134  | 0.000282 | 0.044365 |
| cg02893604 | 14  | 23512805  | Other         | PSMB11    | 84.7440829  | 0.000282 | 0.044365 |
| cg07092212 | 11  | 46382544  | Other         | DGKZ      | -34.096856  | 0.000282 | 0.044365 |
| cg14765414 | 13  | 113652335 | N_Shelf       | MCF2L     | -45.511017  | 0.000282 | 0.044365 |
| cg24492778 | 15  | 57414740  | Other         | TCF12     | -38.873855  | 0.000283 | 0.044365 |
| cg10472067 | 20  | 35402298  | Island        | DSN1      | 766.402082  | 0.000283 | 0.044365 |
| cg25523538 | 10  | 28031957  | Island        | MKX       | 538.956355  | 0.000283 | 0.044365 |
| cg17153426 | 22  | 24640743  | Other         | GGT5      | 33.1390054  | 0.000284 | 0.044365 |
| cg22541400 | 17  | 9840728   | Other         | GAS7      | 39.3960491  | 0.000284 | 0.044365 |
| cg20165746 | 8   | 8870185   | Other         | ERI1      | -43.741102  | 0.000284 | 0.044365 |
| cg04697299 | 2   | 200849634 | Other         | NA        | 33.58326    | 0.000284 | 0.044365 |
| cg12484113 | 1   | 27898757  | N_Shelf       | AHDC1     | 44.4891951  | 0.000284 | 0.044365 |
| cg24139443 | 17  | 74131549  | N_Shelf       | NA        | 43.4012637  | 0.000284 | 0.044365 |
| cg01942776 | 14  | 30920008  | Other         | NA        | 20.5861558  | 0.000284 | 0.044365 |
| cg06081306 | 17  | 37760830  | N_Shore       | NEUROD2   | 104.423769  | 0.000285 | 0.044365 |
| cg14292572 | 12  | 67665055  | S_Shore       | CAND1     | 21.5491788  | 0.000285 | 0.044365 |
| cg18544564 | 2   | 189839120 | Other         | COL3A1    | 31.1999376  | 0.000285 | 0.044365 |

Supplemental Table 1. 2,573 BMI-Associated Methylation Sites in the Normal Breast Study, adjusting for age, race, and alcohol use

| Probe      | CHR | MAPINFO   | CPG Location* | Gene         | Coefficient | p-value  | q-value  |
|------------|-----|-----------|---------------|--------------|-------------|----------|----------|
| cg01775245 | 8   | 6452110   | Other         | MCPH1        | 41.9987393  | 0.000285 | 0.044365 |
| cg16874347 | 2   | 86450216  | Other         | REEP1        | 39.4321093  | 0.000285 | 0.044365 |
| cg09107438 | 12  | 56819060  | Other         | TIMELESS     | -22.838255  | 0.000285 | 0.044365 |
| cg20471783 | 12  | 50157085  | Other         | TMBIM6       | -36.950144  | 0.000285 | 0.044365 |
| cg06169276 | 11  | 71164262  | Island        | NADSYN1      | 1026.05494  | 0.000286 | 0.044365 |
| cg23502162 | 2   | 189839015 | Other         | COL3A1       | 35.6142984  | 0.000286 | 0.044365 |
| cg00450164 | 1   | 209930127 | Other         | TRAF3IP3     | -31.168113  | 0.000286 | 0.044365 |
| cg21228270 | 9   | 133871033 | Other         | NA           | -29.028021  | 0.000286 | 0.044365 |
| cg06566994 | 3   | 44596384  | N_Shore       | ZKSCAN7      | 27.4730798  | 0.000286 | 0.044365 |
| cg24850296 | 12  | 25707569  | Other         | IFLTD1       | -57.974843  | 0.000286 | 0.044365 |
| cg17745697 | 2   | 38138126  | Other         | NA           | -60.568228  | 0.000286 | 0.044397 |
| cg02674693 | 11  | 45109122  | Other         | NA           | 37.2716474  | 0.000287 | 0.044397 |
| cg08251901 | 12  | 15114904  | Other         | ARHGDI3      | -18.473493  | 0.000287 | 0.044397 |
| cg23709430 | 17  | 3977501   | Other         | ZZEF1        | -64.825464  | 0.000287 | 0.044397 |
| cg13895322 | 12  | 6877740   | S_Shore       | PTMS         | 27.5414685  | 0.000287 | 0.044414 |
| cg17244340 | 6   | 36973448  | Other         | FGD2         | -35.137312  | 0.000287 | 0.044414 |
| cg24710179 | 11  | 642975    | N_Shore       | NA           | -83.101633  | 0.000288 | 0.044414 |
| cg02063520 | 6   | 102516590 | Other         | GRIK2        | 28.6950808  | 0.000288 | 0.044414 |
| cg13509421 | 12  | 110476821 | Other         | ANKRD13A     | 28.7955615  | 0.000288 | 0.044414 |
| cg18113826 | 6   | 31583942  | N_Shelf       | AIF1         | -59.35347   | 0.000288 | 0.044414 |
| cg18502630 | 9   | 139871955 | N_Shore       | PTGDS        | 47.8657056  | 0.000288 | 0.044414 |
| cg16689434 | 16  | 90089547  | S_Shore       | GAS8         | 32.2225221  | 0.000288 | 0.044414 |
| cg25618198 | 13  | 26423104  | Other         | ATP8A2       | 47.0472401  | 0.000289 | 0.044525 |
| cg12617080 | 1   | 156509844 | Other         | IQGAP3       | -67.387694  | 0.000289 | 0.044525 |
| cg11842502 | 6   | 111862202 | Other         | TRAF3IP2-AS1 | -34.261911  | 0.00029  | 0.044528 |
| cg12012524 | 19  | 1268008   | Island        | CIRBP        | 43.0054637  | 0.00029  | 0.044528 |
| cg20136855 | 1   | 12233852  | Other         | TNFRSF1B     | -26.193827  | 0.00029  | 0.044528 |
| cg02086790 | 16  | 375327    | Island        | AXIN1        | -50.618803  | 0.00029  | 0.044546 |
| cg21939215 | 11  | 60738995  | Other         | CD6          | -51.079647  | 0.00029  | 0.044552 |
| cg02659854 | 13  | 24824078  | Other         | SPATA13-AS1  | -52.687999  | 0.00029  | 0.044552 |
| cg07137429 | 10  | 100093476 | Other         | NA           | -47.402216  | 0.000291 | 0.044552 |
| cg23627149 | 1   | 193155273 | Other         | B3GALT2      | 24.0925078  | 0.000291 | 0.044552 |
| cg02405503 | 15  | 68871738  | Island        | CORO2B       | -133.11983  | 0.000291 | 0.044552 |
| cg13038847 | 22  | 28073997  | Island        | NA           | -54.066507  | 0.000291 | 0.044552 |
| cg09761367 | 1   | 25360712  | Other         | NA           | -30.293434  | 0.000291 | 0.044552 |
| cg23972298 | 1   | 32665582  | N_Shore       | CCDC28B      | 31.5945895  | 0.000291 | 0.044552 |
| cg22774605 | 6   | 47247047  | Other         | TNFRSF21     | -18.679683  | 0.000292 | 0.044558 |
| cg06548416 | 1   | 24438703  | Other         | MYOM3        | 88.9632771  | 0.000292 | 0.044609 |
| cg04202957 | 2   | 207023158 | N_Shore       | NDUFS1       | 69.0368841  | 0.000293 | 0.044649 |
| cg02881939 | 2   | 43860690  | N_Shelf       | PLEKHH2      | 103.031047  | 0.000293 | 0.044649 |
| cg20309061 | 15  | 42693555  | Other         | CAPN3        | -44.535577  | 0.000293 | 0.044651 |

Supplemental Table 1. 2,573 BMI-Associated Methylation Sites in the Normal Breast Study, adjusting for age, race, and alcohol use

| Probe      | CHR | MAPINFO   | CPG Location* | Gene       | Coefficient | p-value  | q-value  |
|------------|-----|-----------|---------------|------------|-------------|----------|----------|
| cg06319579 | 17  | 8127196   | S_Shore       | LINC00324  | 42.8158287  | 0.000293 | 0.044651 |
| cg16532400 | 7   | 150217056 | Other         | GIMAP7     | -35.022456  | 0.000293 | 0.044651 |
| cg06618298 | 5   | 16913076  | Other         | MYO10      | 31.1603713  | 0.000293 | 0.044651 |
| cg26675485 | 16  | 67968879  | N_Shore       | PSMB10     | 44.1589952  | 0.000295 | 0.044791 |
| cg04332442 | 22  | 46770063  | N_Shore       | CELSR1     | -24.541211  | 0.000295 | 0.044791 |
| cg01357846 | 2   | 79252794  | Other         | REG3G      | 31.2842491  | 0.000295 | 0.044797 |
| cg00955682 | 5   | 138677338 | Island        | PAIP2      | 1162.93355  | 0.000295 | 0.044797 |
| cg08380252 | 19  | 35530254  | N_Shore       | HPN        | -26.860246  | 0.000295 | 0.044797 |
| cg23586138 | 2   | 27719544  | S_Shore       | GCKR       | -47.861478  | 0.000296 | 0.044797 |
| cg16389209 | 10  | 63809121  | Other         | ARID5B     | 39.9723773  | 0.000296 | 0.044797 |
| cg09795027 | 17  | 74006440  | S_Shore       | EVPL       | -50.135035  | 0.000296 | 0.044797 |
| cg02481950 | 16  | 21665002  | Other         | IGSF6      | -52.256578  | 0.000296 | 0.044797 |
| cg14679668 | 8   | 102130344 | Other         | NA         | -23.129176  | 0.000296 | 0.044797 |
| cg20332354 | 12  | 91451819  | Other         | KERA       | 25.8353273  | 0.000297 | 0.044797 |
| cg12282777 | 15  | 74203067  | Other         | NA         | -77.181404  | 0.000297 | 0.044797 |
| cg22908922 | 14  | 105855008 | S_Shelf       | PACS2      | -59.040196  | 0.000297 | 0.044797 |
| cg05453924 | 13  | 24079390  | Other         | NA         | 26.918512   | 0.000297 | 0.044797 |
| cg09594075 | 17  | 1358505   | N_Shore       | CRK        | 74.9248952  | 0.000297 | 0.044797 |
| cg09618904 | 20  | 34026478  | S_Shelf       | GDF5       | 27.8099188  | 0.000297 | 0.044797 |
| cg16562342 | 1   | 109783503 | Other         | NA         | 36.2431426  | 0.000298 | 0.044797 |
| cg13629388 | 6   | 170687780 | S_Shore       | FAM120B    | -30.918275  | 0.000298 | 0.044797 |
| cg17285709 | 2   | 220300242 | Island        | SPEG       | -56.368094  | 0.000298 | 0.044797 |
| cg01210113 | 16  | 11352835  | S_Shelf       | SOCS1      | -42.395945  | 0.000298 | 0.044797 |
| cg12133423 | 8   | 1094575   | N_Shore       | NA         | -42.964077  | 0.000298 | 0.044797 |
| cg03700135 | 17  | 707059    | N_Shore       | NXN        | 42.0103342  | 0.000299 | 0.044797 |
| cg05671385 | 11  | 104915759 | Other         | CARD16     | -32.840527  | 0.000299 | 0.044797 |
| cg04221624 | 10  | 72274527  | Other         | PALD1      | -38.930723  | 0.000299 | 0.044797 |
| cg17687962 | 19  | 51358244  | Other         | KLK3       | -52.699656  | 0.000299 | 0.044797 |
| cg03529043 | 6   | 31021134  | Other         | HCG22      | -45.422452  | 0.000299 | 0.044797 |
| cg07777703 | 17  | 40811829  | S_Shore       | TUBG2      | 86.6833539  | 0.000299 | 0.044797 |
| cg24448340 | 1   | 179921042 | N_Shelf       | CEP350     | -78.097748  | 0.000299 | 0.044797 |
| cg03545548 | 3   | 167320581 | Other         | WDR49      | -32.481728  | 0.0003   | 0.044797 |
| cg13423054 | 3   | 160192028 | Other         | NA         | 51.2761644  | 0.0003   | 0.044797 |
| cg26564172 | 1   | 183728338 | Other         | RGL1       | 46.01543    | 0.0003   | 0.044797 |
| cg26433582 | 11  | 68848232  | N_Shore       | TPCN2      | -56.042208  | 0.0003   | 0.044797 |
| cg05999377 | X   | 152712061 | S_Shore       | TREX2      | -69.852791  | 0.0003   | 0.044797 |
| cg06677151 | 10  | 616959    | Other         | DIP2C      | 24.2772602  | 0.0003   | 0.044797 |
| cg15815084 | 17  | 54912870  | S_Shore       | DGKE       | -19.058424  | 0.0003   | 0.044797 |
| cg16699540 | 3   | 156793711 | Other         | NA         | -29.126678  | 0.000301 | 0.044797 |
| cg17222164 | 17  | 43339476  | Island        | SPATA32    | 68.1069712  | 0.000301 | 0.044797 |
| cg11538810 | 22  | 46481727  | N_Shore       | MIRLET7BHG | 49.498228   | 0.000302 | 0.044797 |

Supplemental Table 1. 2,573 BMI-Associated Methylation Sites in the Normal Breast Study, adjusting for age, race, and alcohol use

| Probe      | CHR | MAPINFO   | CPG Location* | Gene      | Coefficient | p-value  | q-value  |
|------------|-----|-----------|---------------|-----------|-------------|----------|----------|
| cg07148896 | 1   | 11119225  | Island        | SRM       | 42.9809547  | 0.000302 | 0.044797 |
| cg08639762 | 1   | 201437298 | N_Shore       | PHLDA3    | 32.4602109  | 0.000302 | 0.044797 |
| cg04818845 | 1   | 6580167   | Other         | PLEKHG5   | 52.0838897  | 0.000302 | 0.044797 |
| cg25199283 | 1   | 38099265  | N_Shore       | RSPO1     | -61.699969  | 0.000302 | 0.044797 |
| cg25623459 | 11  | 1861344   | Other         | TNNI2     | -34.351019  | 0.000302 | 0.044797 |
| cg10544324 | 3   | 53915957  | Island        | ACTR8     | 158.706004  | 0.000302 | 0.044797 |
| cg22113926 | 17  | 28566331  | S_Shelf       | SLC6A4    | -83.420067  | 0.000302 | 0.044797 |
| cg04664126 | 6   | 28554262  | N_Shore       | SCAND3    | 22.7234433  | 0.000302 | 0.044797 |
| cg04822621 | 5   | 169724656 | Other         | LCP2      | -23.085057  | 0.000302 | 0.044797 |
| cg13029400 | 3   | 141087190 | Other         | ZBTB38    | 57.3292256  | 0.000302 | 0.044797 |
| cg21311067 | 19  | 4916983   | S_Shore       | UHRF1     | -44.221724  | 0.000303 | 0.044797 |
| cg25765104 | 1   | 167601275 | S_Shore       | RCSD1     | -52.302213  | 0.000303 | 0.044797 |
| cg21306988 | 13  | 108867134 | Island        | LIG4      | 27.2061096  | 0.000303 | 0.044797 |
| cg02370667 | 16  | 84029511  | Island        | NECAB2    | -35.258744  | 0.000303 | 0.044797 |
| cg17297216 | 15  | 99194474  | Island        | IGF1R     | 63.9668213  | 0.000303 | 0.044797 |
| cg16064425 | 14  | 101111348 | Other         | NA        | -38.416436  | 0.000303 | 0.044797 |
| cg27487796 | 7   | 28973253  | Other         | NA        | 22.3483782  | 0.000303 | 0.044797 |
| cg13216022 | 15  | 51631687  | N_Shelf       | CYP19A1   | -29.118188  | 0.000304 | 0.044858 |
| cg19011001 | 14  | 93539613  | Other         | ITPK1     | -40.995051  | 0.000304 | 0.044862 |
| cg08370546 | 7   | 56160770  | Other         | PHKG1     | 41.9152961  | 0.000304 | 0.044895 |
| cg12656307 | 1   | 2349734   | S_Shelf       | NA        | 72.0407387  | 0.000305 | 0.044934 |
| cg11338389 | 11  | 63742044  | Island        | COX8A     | 1119.03332  | 0.000305 | 0.044972 |
| cg18213495 | 6   | 17985408  | N_Shelf       | KIF13A    | 61.3319822  | 0.000305 | 0.044986 |
| cg11234013 | 11  | 27646797  | Other         | LINC00678 | -22.512964  | 0.000306 | 0.045053 |
| cg04233521 | 1   | 27743080  | Other         | WASF2     | -44.700394  | 0.000306 | 0.045053 |
| cg07263492 | 8   | 99835768  | N_Shore       | STK3      | -50.337     | 0.000306 | 0.045053 |
| cg27366766 | 17  | 56565286  | Island        | HSF5      | -37.845871  | 0.000307 | 0.04511  |
| cg06419959 | 9   | 140354043 | Island        | NSMF      | 322.973781  | 0.000307 | 0.045126 |
| cg04112866 | 2   | 105925965 | Other         | TGFBRAP1  | -43.404918  | 0.000307 | 0.045126 |
| cg03467087 | 6   | 158448134 | Other         | SYNJ2     | -25.395014  | 0.000308 | 0.045126 |
| cg03293883 | 6   | 86124742  | Other         | NA        | -35.698397  | 0.000308 | 0.045126 |
| cg03001305 | 17  | 40439492  | N_Shore       | STAT5A    | -42.484722  | 0.000308 | 0.045126 |
| cg20531872 | 3   | 196440087 | S_Shore       | PIGX      | 87.0192431  | 0.000308 | 0.045199 |
| cg02185248 | 17  | 78748494  | Other         | RPTOR     | -54.445742  | 0.000309 | 0.045199 |
| cg14045814 | 2   | 219267341 | S_Shore       | MIR26B    | 45.1225698  | 0.000309 | 0.045199 |
| cg06592027 | 5   | 38445220  | Other         | EGFLAM    | 24.6337045  | 0.000309 | 0.045199 |
| cg23433370 | 12  | 27396894  | N_Shore       | STK38L    | -41.26764   | 0.000309 | 0.045199 |
| cg11002208 | 2   | 241562650 | Island        | GPR35     | -36.494187  | 0.000309 | 0.045199 |
| cg05185634 | 14  | 24804750  | S_Shore       | ADCY4     | -91.183686  | 0.00031  | 0.045223 |
| cg20306842 | 7   | 28475265  | Other         | CREB5     | -74.716736  | 0.00031  | 0.045223 |
| cg16499834 | 12  | 131355834 | N_Shore       | RAN       | 32.2502479  | 0.00031  | 0.045223 |

Supplemental Table 1. 2,573 BMI-Associated Methylation Sites in the Normal Breast Study, adjusting for age, race, and alcohol use

| Probe      | CHR | MAPINFO   | CPG Location* | Gene      | Coefficient | p-value  | q-value  |
|------------|-----|-----------|---------------|-----------|-------------|----------|----------|
| cg23992426 | 11  | 47870622  | S_Shore       | NUP160    | 119.337519  | 0.00031  | 0.045223 |
| cg15529532 | 10  | 15077470  | Other         | NA        | -41.41294   | 0.00031  | 0.045224 |
| cg19357849 | 19  | 8071093   | Other         | ELAVL1    | 107.128802  | 0.00031  | 0.045233 |
| cg24566261 | 6   | 30854164  | S_Shore       | DDR1      | 50.513464   | 0.00031  | 0.045233 |
| cg04442631 | 22  | 36593144  | Other         | APOL4     | -19.453914  | 0.000311 | 0.045271 |
| cg22613905 | 2   | 240039481 | Other         | HDAC4     | -66.746853  | 0.000311 | 0.045271 |
| cg18081338 | 6   | 17212963  | Other         | NA        | 34.2903488  | 0.000312 | 0.045271 |
| cg04869379 | 13  | 109610256 | Other         | MYO16     | 24.0342956  | 0.000312 | 0.045271 |
| cg11999571 | 8   | 25442428  | Other         | NA        | 28.1105512  | 0.000312 | 0.045271 |
| cg15658306 | 6   | 41168972  | Other         | TREML2    | -42.916619  | 0.000312 | 0.045271 |
| cg07766743 | 8   | 27348001  | N_Shore       | EPHX2     | 26.7709889  | 0.000312 | 0.045271 |
| cg22073869 | 13  | 98866089  | Other         | FARP1     | 46.7306308  | 0.000312 | 0.045271 |
| cg25243775 | 22  | 45903119  | S_Shelf       | FBLN1     | 67.3417415  | 0.000312 | 0.045293 |
| cg21579294 | 13  | 113997499 | Other         | GRTP1     | -53.684638  | 0.000313 | 0.045347 |
| cg26780138 | 16  | 477087    | S_Shore       | RAB11FIP3 | 131.845422  | 0.000313 | 0.045347 |
| cg05266786 | 10  | 49742271  | Other         | ARHGAP22  | 26.8066435  | 0.000314 | 0.045405 |
| cg26792089 | 16  | 28518200  | Other         | IL27      | -55.689634  | 0.000314 | 0.045471 |
| cg22260478 | 6   | 132272790 | S_Shore       | CTGF      | 47.3503324  | 0.000315 | 0.045473 |
| cg27395391 | 6   | 16375082  | Other         | ATXN1     | 25.2591     | 0.000315 | 0.045473 |
| cg07630327 | 5   | 131008111 | Other         | FNIP1     | 19.3531638  | 0.000315 | 0.045473 |
| cg01367328 | 7   | 162351    | S_Shelf       | NA        | -43.062233  | 0.000315 | 0.045473 |
| cg10726475 | 3   | 149375252 | Island        | WWTR1     | 277.340426  | 0.000315 | 0.045473 |
| cg22935317 | 14  | 23447078  | N_Shelf       | AJUBA     | 33.7005485  | 0.000315 | 0.045473 |
| cg04432599 | 17  | 4835608   | Other         | GP1BA     | -32.840276  | 0.000315 | 0.045473 |
| cg05616355 | 11  | 124480990 | Other         | PANX3     | 38.8663145  | 0.000316 | 0.045473 |
| cg20538986 | 17  | 19295550  | Other         | NA        | 41.8666004  | 0.000316 | 0.045474 |
| cg18230356 | X   | 135045624 | Other         | MMGT1     | 95.8251182  | 0.000316 | 0.045486 |
| cg02102684 | 16  | 4421445   | N_Shore       | VASN      | 32.4933104  | 0.000316 | 0.045486 |
| cg12136883 | 4   | 120613606 | Other         | NA        | 38.1800559  | 0.000317 | 0.04552  |
| cg16706099 | 11  | 100590197 | Other         | ARHGAP42  | 39.3173222  | 0.000317 | 0.045527 |
| cg10464462 | 17  | 33417059  | S_Shore       | RFFL      | -29.742692  | 0.000317 | 0.045565 |
| cg06591011 | 4   | 111086137 | Other         | ELOVL6    | -35.408997  | 0.000318 | 0.045648 |
| cg17166282 | 13  | 103249241 | Island        | TPP2      | 7684.04884  | 0.000318 | 0.045648 |
| cg05802141 | 16  | 29911556  | Island        | ASPHD1    | 3807.06132  | 0.000318 | 0.045648 |
| cg10919177 | 3   | 44519663  | S_Shore       | ZNF445    | 35.1761973  | 0.000318 | 0.045648 |
| cg00071391 | 4   | 126560514 | Other         | NA        | 23.6616528  | 0.000319 | 0.045671 |
| cg17736336 | 5   | 148788401 | Other         | MIR143HG  | 40.4434731  | 0.000319 | 0.045684 |
| cg10592592 | 10  | 74034663  | Island        | DDIT4     | 45.2194618  | 0.000319 | 0.045703 |
| cg24525952 | 7   | 2127830   | Other         | MAD1L1    | -50.363347  | 0.00032  | 0.045736 |
| cg00137016 | 19  | 52675231  | S_Shore       | ZNF836    | 40.539364   | 0.00032  | 0.045736 |
| cg17426905 | 7   | 50612053  | Other         | DDC       | 75.3752416  | 0.00032  | 0.045736 |

Supplemental Table 1. 2,573 BMI-Associated Methylation Sites in the Normal Breast Study, adjusting for age, race, and alcohol use

| Probe      | CHR | MAPINFO   | CPG Location* | Gene      | Coefficient | p-value  | q-value  |
|------------|-----|-----------|---------------|-----------|-------------|----------|----------|
| cg09852607 | 3   | 128205200 | N_Shore       | GATA2     | 29.7019196  | 0.00032  | 0.045736 |
| cg00917031 | 9   | 123477533 | S_Shore       | MEGF9     | 46.228047   | 0.000321 | 0.045736 |
| cg26608486 | 16  | 88482341  | Other         | NA        | -79.977229  | 0.000321 | 0.045736 |
| cg22898924 | 19  | 4903952   | Other         | ARRDC5    | -52.671197  | 0.000321 | 0.045736 |
| cg01595717 | 9   | 140586201 | N_Shore       | EHMT1     | -31.87486   | 0.000321 | 0.045765 |
| cg10299128 | 4   | 82796846  | Other         | NA        | -31.308455  | 0.000321 | 0.045765 |
| cg05885577 | 10  | 104597359 | Other         | CYP17A1   | 39.101744   | 0.000321 | 0.045781 |
| cg07212541 | 15  | 101442710 | Other         | ALDH1A3   | 31.3277532  | 0.000322 | 0.045805 |
| cg12708109 | 1   | 168397916 | Other         | NA        | 37.4452541  | 0.000322 | 0.045821 |
| cg20942867 | 1   | 27426144  | Other         | SLC9A1    | 35.2719607  | 0.000322 | 0.045821 |
| cg04661001 | 19  | 19217217  | N_Shelf       | SLC25A42  | 50.3813737  | 0.000322 | 0.045827 |
| cg04441857 | 10  | 14701815  | Other         | FAM107B   | -51.02137   | 0.000323 | 0.045829 |
| cg23121335 | 11  | 67784489  | Other         | ALDH3B1   | 136.852977  | 0.000323 | 0.045863 |
| cg16582803 | 2   | 219763642 | S_Shore       | NA        | 40.3143812  | 0.000323 | 0.045863 |
| cg24699699 | 1   | 93258316  | Other         | EVI5      | -27.643737  | 0.000324 | 0.045915 |
| cg02551095 | 15  | 33597346  | Other         | NA        | -45.073391  | 0.000324 | 0.045928 |
| cg23484159 | 14  | 74184843  | N_Shore       | PNMA1     | 44.1673011  | 0.000324 | 0.045928 |
| cg05420143 | 2   | 210286628 | N_Shore       | MAP2      | 36.2288472  | 0.000325 | 0.045987 |
| cg01715248 | 9   | 93953608  | N_Shore       | NA        | -65.496647  | 0.000325 | 0.045987 |
| cg08343834 | 17  | 15168658  | S_Shelf       | PMP22     | 22.7128014  | 0.000325 | 0.045991 |
| cg01063509 | 1   | 20502234  | Other         | PLA2G2C   | 36.4857623  | 0.000325 | 0.045994 |
| cg15484406 | 14  | 94461913  | Other         | LINC00521 | 34.3546882  | 0.000325 | 0.045994 |
| cg16013543 | 1   | 154300241 | N_Shore       | ATP8B2    | -45.662104  | 0.000326 | 0.045994 |
| cg02072940 | 6   | 31656126  | Other         | ABHD16A   | 71.1456345  | 0.000326 | 0.045994 |
| cg26337914 | 7   | 157461081 | Other         | PTPRN2    | -59.690134  | 0.000326 | 0.045994 |
| cg11934819 | 20  | 1472078   | Other         | SIRPB2    | -36.475897  | 0.000326 | 0.045994 |
| cg07975680 | 10  | 73225789  | Other         | CDH23     | -37.033707  | 0.000326 | 0.045994 |
| cg12545949 | 6   | 71571446  | Other         | B3GAT2    | -84.79943   | 0.000326 | 0.045994 |
| cg04656451 | 20  | 5626258   | Other         | NA        | -27.617918  | 0.000327 | 0.046012 |
| cg25503381 | 15  | 39871923  | N_Shore       | THBS1     | 46.049718   | 0.000327 | 0.046035 |
| cg26022064 | 7   | 98739782  | N_Shore       | SMURF1    | 37.0262405  | 0.000327 | 0.046035 |
| cg24063856 | 17  | 43863303  | S_Shore       | CRHR1     | -23.557211  | 0.000328 | 0.046035 |
| cg00193668 | 9   | 35814283  | N_Shore       | HINT2     | 50.4729504  | 0.000328 | 0.046035 |
| cg02839593 | 16  | 66934539  | Other         | NA        | 43.026837   | 0.000328 | 0.046035 |
| cg08428819 | 10  | 123924042 | S_Shore       | TACC2     | -53.728497  | 0.000328 | 0.046035 |
| cg17372758 | 10  | 73976798  | S_Shore       | ASCC1     | 25.8627382  | 0.000328 | 0.046035 |
| cg23359665 | 6   | 32120907  | N_Shore       | PPT2      | 52.6990239  | 0.000328 | 0.046035 |
| cg16151795 | 11  | 1918450   | Other         | NA        | -50.879295  | 0.000329 | 0.046035 |
| cg24484905 | 1   | 58530146  | Other         | DAB1      | -153.61344  | 0.000329 | 0.046035 |
| cg12635120 | 12  | 121345228 | S_Shelf       | SPPL3     | 21.6807591  | 0.000329 | 0.046035 |
| cg00054706 | 2   | 68289972  | Other         | C1D       | 597.819512  | 0.000329 | 0.046035 |

Supplemental Table 1. 2,573 BMI-Associated Methylation Sites in the Normal Breast Study, adjusting for age, race, and alcohol use

| Probe      | CHR | MAPINFO   | CPG Location* | Gene     | Coefficient | p-value  | q-value  |
|------------|-----|-----------|---------------|----------|-------------|----------|----------|
| cg13284470 | 2   | 69001115  | Other         | ARHGAP25 | -30.852672  | 0.000329 | 0.046035 |
| cg15621731 | 19  | 5074616   | Island        | KDM4B    | -51.219121  | 0.000329 | 0.046035 |
| cg25143508 | 1   | 203449947 | Other         | PRELP    | 49.2906072  | 0.000329 | 0.046035 |
| cg20731384 | 10  | 134993392 | S_Shore       | KNDC1    | -44.43628   | 0.00033  | 0.046042 |
| cg02945192 | 19  | 1038140   | N_Shore       | ABCA7    | -50.56408   | 0.00033  | 0.046042 |
| cg17603988 | 7   | 56160766  | Other         | PHKG1    | 30.6090353  | 0.00033  | 0.046042 |
| cg04237436 | 11  | 35808688  | Other         | TRIM44   | 53.6485633  | 0.00033  | 0.046042 |
| cg09763644 | 1   | 207103660 | Other         | PIGR     | -32.672961  | 0.00033  | 0.046042 |
| cg04682967 | 22  | 37608626  | Other         | SSTR3    | 69.2263545  | 0.000331 | 0.046067 |
| cg03208902 | 16  | 3265467   | Other         | OR1F2P   | -33.682685  | 0.000331 | 0.046067 |
| cg24724587 | 1   | 86044103  | S_Shore       | DDAH1    | 39.6189974  | 0.000331 | 0.046067 |
| cg00502509 | 7   | 1956121   | Other         | MAD1L1   | -37.227285  | 0.000331 | 0.046067 |
| cg20969822 | 19  | 41787138  | Other         | HNRNPUL1 | 36.0782752  | 0.000331 | 0.046067 |
| cg07682037 | 11  | 63974153  | N_Shore       | FERMT3   | -52.012367  | 0.000332 | 0.046067 |
| cg08947774 | 4   | 169644750 | Other         | PALLD    | -31.761638  | 0.000332 | 0.046067 |
| cg03498081 | 16  | 80061357  | Other         | NA       | -34.235444  | 0.000332 | 0.046067 |
| cg12950181 | 5   | 93447648  | S_Shore       | FAM172A  | 47.6097155  | 0.000332 | 0.046067 |
| cg21957813 | 11  | 44638520  | Other         | CD82     | 43.7780528  | 0.000332 | 0.046067 |
| cg24742298 | 17  | 27309486  | N_Shelf       | SEZ6     | -22.311519  | 0.000332 | 0.046067 |
| cg13475578 | 12  | 99548550  | Other         | ANKS1B   | 44.1297775  | 0.000332 | 0.046067 |
| cg17329202 | 13  | 113807930 | S_Shore       | NA       | 38.3660543  | 0.000332 | 0.046067 |
| cg17845532 | 19  | 3786643   | Island        | MATK     | 47.6382547  | 0.000333 | 0.04609  |
| cg02054776 | 1   | 165326345 | S_Shore       | LMX1A    | -35.35608   | 0.000333 | 0.04609  |
| cg24342094 | 1   | 112047496 | Other         | ADORA3   | -120.59216  | 0.000333 | 0.04609  |
| cg02149069 | 12  | 6649733   | Island        | IFFO1    | -34.025644  | 0.000334 | 0.04609  |
| cg14781394 | 19  | 16441457  | S_Shelf       | NA       | -38.058939  | 0.000334 | 0.04609  |
| cg06760507 | 1   | 161168145 | N_Shelf       | ADAMTS4  | 40.6465364  | 0.000334 | 0.04609  |
| cg18003659 | 2   | 175629267 | Other         | CHRNA1   | 48.3842603  | 0.000334 | 0.04609  |
| cg27425413 | 6   | 4974439   | Other         | NA       | 28.3866085  | 0.000334 | 0.04609  |
| cg09106231 | 1   | 207455715 | Other         | NA       | -34.028766  | 0.000335 | 0.04609  |
| cg13689831 | 1   | 227175077 | Other         | ADCK3    | -43.515202  | 0.000335 | 0.04609  |
| cg19211853 | 13  | 79968216  | Other         | RBM26    | -28.102322  | 0.000335 | 0.04609  |
| cg12054981 | 8   | 42037387  | Other         | PLAT     | -28.310339  | 0.000335 | 0.04609  |
| cg00679520 | 12  | 63133578  | Other         | PPM1H    | 23.6318084  | 0.000335 | 0.04609  |
| cg25963980 | 11  | 35442225  | S_Shore       | SLC1A2   | -29.382488  | 0.000336 | 0.04609  |
| cg21578596 | 6   | 32906460  | Other         | HLA-DMB  | -43.815641  | 0.000336 | 0.04609  |
| cg09773238 | 11  | 113424208 | Other         | NA       | 23.0556607  | 0.000336 | 0.04609  |
| cg09990481 | 10  | 90712684  | Other         | ACTA2    | 46.0202808  | 0.000336 | 0.04609  |
| cg02866149 | 20  | 35405989  | S_Shelf       | DSN1     | 57.3715624  | 0.000336 | 0.04609  |
| cg24777399 | 2   | 109855574 | Other         | SH3RF3   | -41.737509  | 0.000337 | 0.04609  |
| cg00849854 | 17  | 17780937  | Other         | TOM1L2   | 35.2576002  | 0.000337 | 0.04609  |

Supplemental Table 1. 2,573 BMI-Associated Methylation Sites in the Normal Breast Study, adjusting for age, race, and alcohol use

| Probe         | CHR | MAPINFO   | CPG Location* | Gene      | Coefficient | p-value  | q-value  |
|---------------|-----|-----------|---------------|-----------|-------------|----------|----------|
| cg10548978    | 10  | 72545053  | Other         | TBATA     | -69.8414    | 0.000337 | 0.04609  |
| cg04132891    | 3   | 112351647 | Other         | CCDC80    | 38.7540771  | 0.000337 | 0.04609  |
| cg17674726    | 2   | 231743193 | Other         | ITM2C     | -57.707366  | 0.000337 | 0.04609  |
| cg01638225    | 4   | 1202930   | N_Shore       | SPON2     | 40.0988199  | 0.000337 | 0.04609  |
| cg04079779    | 16  | 2256121   | S_Shore       | MLST8     | 72.5804907  | 0.000337 | 0.04609  |
| cg13930766    | 9   | 122577345 | Other         | NA        | -57.054259  | 0.000337 | 0.04609  |
| ch.6.16900848 | 6   | 169266563 | Other         | NA        | -36.096398  | 0.000337 | 0.04609  |
| cg17893934    | 10  | 858817    | S_Shelf       | LARP4B    | 51.4524652  | 0.000337 | 0.04609  |
| cg06556244    | 7   | 143089459 | Other         | EPHA1     | 57.1648008  | 0.000338 | 0.04609  |
| cg21667244    | 13  | 111281324 | S_Shelf       | CARKD     | 43.9255024  | 0.000338 | 0.04609  |
| cg19749538    | 4   | 78114867  | Other         | NA        | -43.474753  | 0.000338 | 0.04609  |
| cg23950714    | 5   | 176935364 | S_Shelf       | DOK3      | -35.07299   | 0.000338 | 0.04609  |
| cg06901890    | 9   | 132803508 | N_Shore       | FNBP1     | -54.124467  | 0.000338 | 0.04609  |
| cg24129177    | 12  | 132076442 | Other         | NA        | 55.2648773  | 0.000338 | 0.046128 |
| cg15620114    | 10  | 91296457  | S_Shore       | SLC16A12  | -100.81817  | 0.000339 | 0.046134 |
| cg24590430    | 10  | 99097076  | S_Shelf       | FRAT2     | 36.5288439  | 0.000339 | 0.04618  |
| cg15907473    | 13  | 95253641  | N_Shore       | GPR180    | 46.2758467  | 0.000339 | 0.046198 |
| cg07096238    | 2   | 66589902  | Other         | MIR4778   | -34.352606  | 0.00034  | 0.046242 |
| cg09398762    | 13  | 107571965 | S_Shore       | NA        | -19.643312  | 0.00034  | 0.046242 |
| cg11736942    | 14  | 105054436 | N_Shore       | C14orf180 | -74.291288  | 0.00034  | 0.046242 |
| cg26078436    | 11  | 5265992   | Other         | HBBP1     | 26.2489525  | 0.000341 | 0.046249 |
| cg25940517    | 12  | 113645509 | Other         | IQCD      | -39.672745  | 0.000341 | 0.046275 |
| cg17601785    | 5   | 71475111  | Other         | MAP1B     | 29.9177314  | 0.000341 | 0.046286 |
| cg20511815    | 7   | 5537036   | N_Shelf       | MIR589    | -48.707799  | 0.000341 | 0.046289 |
| cg06126593    | 16  | 20910405  | N_Shore       | LYRM1     | 48.8221936  | 0.000342 | 0.046348 |
| cg14700104    | 5   | 139527250 | S_Shore       | NA        | 75.9113887  | 0.000342 | 0.046348 |
| cg21964800    | 11  | 63272764  | Other         | LGALS12   | -27.26189   | 0.000342 | 0.046348 |
| cg20873136    | 2   | 129037710 | Other         | HS6ST1    | -46.578766  | 0.000343 | 0.046403 |
| cg05146756    | 9   | 21558871  | N_Shore       | MIR31HG   | -29.755191  | 0.000344 | 0.046478 |
| cg09823760    | 12  | 131484594 | Other         | GPR133    | 55.103042   | 0.000344 | 0.046478 |
| cg22210337    | 11  | 2322808   | Other         | C11orf21  | -43.252913  | 0.000344 | 0.04648  |
| cg25877009    | 8   | 142288517 | Other         | NA        | -80.538841  | 0.000344 | 0.046484 |
| cg02927747    | 18  | 60381593  | N_Shore       | PHLPP1    | -31.344184  | 0.000344 | 0.046484 |
| cg10710218    | 1   | 55012989  | Other         | ACOT11    | -59.556267  | 0.000344 | 0.046484 |
| cg14299883    | 12  | 80447038  | Other         | NA        | 72.975024   | 0.000345 | 0.046484 |
| cg23586792    | 2   | 200423026 | Other         | NA        | 98.0735497  | 0.000345 | 0.046495 |
| cg00040749    | 2   | 62556079  | Other         | NA        | -57.943419  | 0.000345 | 0.046495 |
| cg10370574    | 19  | 1840461   | Other         | REXO1     | -39.927503  | 0.000345 | 0.046495 |
| cg07007807    | 12  | 117176115 | Island        | RNFT2     | 1516.82699  | 0.000345 | 0.046495 |
| cg20345915    | 10  | 121296042 | Other         | RGS10     | -37.0803    | 0.000346 | 0.046495 |
| cg13578303    | 19  | 49838698  | N_Shelf       | CD37      | -53.417797  | 0.000346 | 0.046495 |

Supplemental Table 1. 2,573 BMI-Associated Methylation Sites in the Normal Breast Study, adjusting for age, race, and alcohol use

| Probe      | CHR | MAPINFO   | CPG Location* | Gene      | Coefficient | p-value  | q-value  |
|------------|-----|-----------|---------------|-----------|-------------|----------|----------|
| cg00787013 | 10  | 125665208 | Other         | NA        | 63.6101096  | 0.000346 | 0.046495 |
| cg09130190 | 11  | 32115439  | S_Shelf       | RCN1      | 51.1453928  | 0.000346 | 0.046495 |
| cg02395812 | 14  | 105955879 | N_Shore       | C14orf80  | 43.9471905  | 0.000346 | 0.046495 |
| cg23537932 | 10  | 121172463 | Other         | GRK5      | 41.4580162  | 0.000346 | 0.046495 |
| cg15549251 | 15  | 40426006  | Other         | NA        | -73.06448   | 0.000347 | 0.046505 |
| cg24754956 | 19  | 1729851   | S_Shelf       | NA        | 44.1379481  | 0.000347 | 0.046531 |
| cg19874726 | 14  | 61114476  | Island        | SIX1      | -29.596407  | 0.000348 | 0.046587 |
| cg11100309 | 12  | 57637268  | Island        | NDUFA4L2  | 63.7877736  | 0.000348 | 0.046587 |
| cg01389728 | 10  | 6620572   | N_Shore       | PRKCCQ    | -19.129262  | 0.000348 | 0.046618 |
| cg07897701 | 7   | 150549370 | Other         | AOC1      | -58.525013  | 0.000349 | 0.046671 |
| cg15155441 | 11  | 57005981  | Other         | APLNR     | -83.201703  | 0.000349 | 0.046671 |
| cg06147863 | 11  | 47400113  | S_Shore       | SPI1      | -27.795857  | 0.000349 | 0.046671 |
| cg11953516 | 2   | 27719501  | S_Shore       | GCKR      | -45.131554  | 0.000349 | 0.046671 |
| cg22180580 | 6   | 138867046 | Other         | NHSL1     | 37.3244528  | 0.000349 | 0.046671 |
| cg04822278 | 12  | 125023878 | S_Shore       | NCOR2     | 21.0740734  | 0.000349 | 0.046671 |
| cg05289022 | 2   | 98377864  | Other         | TMEM131   | -78.995611  | 0.00035  | 0.046686 |
| cg14533068 | 6   | 158507953 | Island        | SYNJ2     | -66.809939  | 0.00035  | 0.046743 |
| cg11854227 | 3   | 121714109 | S_Shore       | ILDR1     | -39.058175  | 0.000351 | 0.04682  |
| cg25727029 | 15  | 89482453  | Other         | NA        | -54.037543  | 0.000351 | 0.04682  |
| cg11370814 | 2   | 242927418 | N_Shore       | NA        | -38.625085  | 0.000352 | 0.04682  |
| cg25816696 | 2   | 239427974 | Other         | LOC151171 | 65.8368889  | 0.000352 | 0.04682  |
| cg10421194 | 2   | 43133914  | Other         | NA        | 27.5976388  | 0.000352 | 0.04682  |
| cg27520905 | 7   | 153999655 | N_Shelf       | DPP6      | 24.7601578  | 0.000353 | 0.04682  |
| cg01209642 | 6   | 170581355 | S_Shore       | NA        | -53.437004  | 0.000353 | 0.04682  |
| cg14189441 | 10  | 30971547  | Other         | NA        | 40.9426582  | 0.000353 | 0.04682  |
| cg12633817 | 7   | 1117479   | N_Shelf       | C7orf50   | -32.771595  | 0.000353 | 0.04682  |
| cg23081604 | 12  | 130824224 | S_Shore       | PIWIL1    | 44.231246   | 0.000353 | 0.04682  |
| cg15034267 | 22  | 39106452  | S_Shelf       | GTPBP1    | -52.456469  | 0.000353 | 0.04682  |
| cg13600632 | 9   | 129169002 | Other         | NRON      | 43.182975   | 0.000353 | 0.04682  |
| cg06596943 | 6   | 901264    | Other         | NA        | 25.5621663  | 0.000353 | 0.04682  |
| cg13637552 | 11  | 1534712   | N_Shelf       | MOB2      | -51.441794  | 0.000354 | 0.04682  |
| cg09317128 | 4   | 56265301  | S_Shelf       | TMEM165   | 39.855735   | 0.000354 | 0.04682  |
| cg15969901 | 6   | 36810478  | S_Shore       | CPNE5     | -39.187927  | 0.000354 | 0.04682  |
| cg23618218 | 12  | 51474138  | N_Shelf       | CSRNP2    | 41.5700023  | 0.000354 | 0.04682  |
| cg13945880 | 5   | 171008055 | Other         | NA        | 55.4102467  | 0.000354 | 0.046842 |
| cg17372408 | 8   | 143427750 | N_Shore       | TSNARE1   | 39.7800002  | 0.000354 | 0.046842 |
| cg17319795 | 14  | 93170808  | Other         | LGMN      | -54.340414  | 0.000355 | 0.046842 |
| cg00486259 | 4   | 152096720 | Other         | SH3D19    | 27.8876109  | 0.000355 | 0.046842 |
| cg04012600 | 1   | 109850126 | Other         | MYBPHL    | -39.844577  | 0.000355 | 0.046868 |
| cg15241074 | 2   | 12860614  | S_Shore       | TRIB2     | 42.0566105  | 0.000355 | 0.046904 |
| cg08951051 | 16  | 4993543   | Other         | NA        | 44.7608815  | 0.000356 | 0.046904 |

Supplemental Table 1. 2,573 BMI-Associated Methylation Sites in the Normal Breast Study, adjusting for age, race, and alcohol use

| Probe      | CHR | MAPINFO   | CPG Location* | Gene      | Coefficient      | p-value  | q-value  |
|------------|-----|-----------|---------------|-----------|------------------|----------|----------|
| cg00664697 | 16  | 80061290  | Other         | NA        | -42.19572        | 0.000356 | 0.046907 |
| cg23878494 | 11  | 63687937  | S_Shore       | RCOR2     | 46.4728131       | 0.000356 | 0.046926 |
| cg14324675 | 6   | 31554848  | Other         | LST1      | -61.75071        | 0.000356 | 0.046926 |
| cg04121415 | 3   | 38325566  | Other         | NA        | 29.6869149       | 0.000357 | 0.046933 |
| cg22844229 | 12  | 58013475  | Island        | SLC26A10  | -34.72238        | 0.000357 | 0.046933 |
| cg26312337 | 2   | 25170414  | Other         | DNAJC27   | 32.9204114       | 0.000357 | 0.046933 |
| cg00732378 | 16  | 55021073  | Other         | NA        | -44.934778       | 0.000357 | 0.046933 |
| cg27078890 | 11  | 128457459 | Other         | ETS1      | 48.6147713       | 0.000357 | 0.046933 |
| cg19408626 | 1   | 12189773  | Other         | TNFRSF8   | -52.640751       | 0.000358 | 0.046936 |
| cg23054840 | 10  | 45920485  | N_Shelf       | ALOX5     | -32.741698       | 0.000358 | 0.046936 |
| cg12871285 | 17  | 76713379  | Other         | CYTH1     | 25.9911412       | 0.000358 | 0.046936 |
| cg20625523 | 2   | 64893849  | Other         | NA        | -40.170015       | 0.000358 | 0.046991 |
| cg01372366 | 11  | 48041783  | Other         | PTPRJ     | -50.44146        | 0.000358 | 0.047    |
| cg11028624 | 11  | 13983793  | N_Shore       | SPON1     | -41.457738       | 0.000359 | 0.047029 |
| cg20198611 | 6   | 33163689  | S_Shelf       | COL11A2   | 53.0169194       | 0.000359 | 0.047032 |
| cg14443726 | 9   | 129468049 | N_Shore       | NA        | 153.299051       | 0.000359 | 0.047055 |
| cg20594303 | 10  | 60680256  | Other         | NA        | 62.4977554       | 0.00036  | 0.047055 |
| cg27554551 | 16  | 4421486   | N_Shore       | VASN      | 34.8264888       | 0.00036  | 0.047055 |
| cg03716908 | 5   | 81149002  | Other         | NA        | 41.5016833       | 0.00036  | 0.047085 |
| cg24962576 | 3   | 42745362  | Other         | HHATL     | -70.407131       | 0.000361 | 0.047153 |
| cg19214300 | 16  | 56709503  | N_Shore       | MT1IP     | -41.389353       | 0.000362 | 0.047221 |
| cg27350483 | 17  | 58822074  | Other         | BCAS3     | 36.1893776       | 0.000362 | 0.047221 |
| cg27368523 | 2   | 113544348 | Other         | IL1A      | -51.573912       | 0.000362 | 0.047221 |
| cg01401037 | 3   | 185839955 | Other         | NA        | 33.3043933       | 0.000362 | 0.047221 |
| cg19961151 | 5   | 68207879  | Other         | NA        | 30.0486602       | 0.000363 | 0.047221 |
| cg06489606 | 17  | 80251697  | S_Shore       | NA        | 49.930947        | 0.000363 | 0.047221 |
| cg01386185 | 3   | 15935423  | Other         | NA        | 47.0812754       | 0.000363 | 0.047221 |
| cg03330678 | 17  | 75316233  | Other         |           | 9-Sep 35.1844633 | 0.000363 | 0.047221 |
| cg06898168 | 7   | 5447353   | Other         | TNRC18    | 41.1229438       | 0.000363 | 0.047221 |
| cg22479403 | 5   | 151328842 | Other         | NA        | 35.2276986       | 0.000363 | 0.047221 |
| cg16277944 | 5   | 169068404 | S_Shelf       | DOCK2     | 27.1953522       | 0.000364 | 0.047221 |
| cg16903025 | 8   | 124549553 | N_Shelf       | FBXO32    | 45.2839424       | 0.000364 | 0.047221 |
| cg24795614 | 2   | 44973115  | Other         | CAMKMT    | -30.153948       | 0.000364 | 0.047221 |
| cg06635832 | 5   | 154654216 | Other         | NA        | -23.619585       | 0.000364 | 0.047221 |
| cg17441062 | 11  | 88242604  | S_Shore       | GRM5-AS1  | -34.262536       | 0.000364 | 0.047221 |
| cg17518965 | 19  | 3178955   | Island        | S1PR4     | -51.456365       | 0.000364 | 0.047284 |
| cg20976581 | 17  | 34080240  | Other         | GAS2L2    | 70.7319153       | 0.000366 | 0.047314 |
| cg02857726 | 3   | 149088388 | Other         | TM4SF1    | -29.396926       | 0.000366 | 0.047314 |
| cg05944877 | 16  | 24197863  | Other         | PRKCB     | 51.9167192       | 0.000366 | 0.047314 |
| cg17973773 | 8   | 27695870  | S_Shore       | PBK       | 43.051031        | 0.000366 | 0.047314 |
| cg22365240 | 2   | 105374995 | Other         | LOC284998 | 31.2252641       | 0.000366 | 0.047314 |

Supplemental Table 1. 2,573 BMI-Associated Methylation Sites in the Normal Breast Study, adjusting for age, race, and alcohol use

| Probe      | CHR | MAPINFO   | CPG Location* | Gene         | Coefficient | p-value  | q-value  |
|------------|-----|-----------|---------------|--------------|-------------|----------|----------|
| cg05590274 | 11  | 113262625 | S_Shelf       | ANKK1        | -32.355671  | 0.000366 | 0.047314 |
| cg03925411 | 3   | 35986831  | Other         | NA           | -180.94827  | 0.000367 | 0.047314 |
| cg16227748 | 2   | 232186992 | Other         | ARMC9        | -29.063701  | 0.000367 | 0.047314 |
| cg16974893 | 3   | 156799514 | Other         | LINC00880    | 62.1793269  | 0.000367 | 0.047314 |
| cg02434051 | 19  | 54848878  | Other         | LILRA4       | 38.0559899  | 0.000368 | 0.047314 |
| cg12808347 | 2   | 11622001  | Island        | NA           | -54.945108  | 0.000368 | 0.047314 |
| cg10809783 | 6   | 148784879 | Other         | SASH1        | -65.585611  | 0.000368 | 0.047314 |
| cg19618297 | 13  | 112760313 | Island        | NA           | 123.950126  | 0.000368 | 0.047314 |
| cg12492496 | 19  | 18271859  | Island        | PIK3R2       | 34.1122526  | 0.000368 | 0.047314 |
| cg08790487 | 5   | 179135308 | Other         | CANX         | -46.708861  | 0.000368 | 0.047314 |
| cg03980424 | 10  | 3526723   | Other         | NA           | -22.413176  | 0.000368 | 0.047314 |
| cg12947138 | 5   | 71475303  | Other         | MAP1B        | 24.1791819  | 0.000368 | 0.047314 |
| cg27352123 | 5   | 92353980  | Other         | NA           | 56.3414061  | 0.000368 | 0.047314 |
| cg16667251 | 2   | 54697181  | Other         | SPTBN1       | -30.280847  | 0.000368 | 0.047314 |
| cg19272266 | 8   | 38125865  | N_Shore       | PPAPDC1B     | 32.5554952  | 0.000368 | 0.047314 |
| cg11580525 | 11  | 118022923 | N_Shore       | SCN4B        | 38.3088037  | 0.000369 | 0.047314 |
| cg00447208 | 17  | 76126301  | N_Shore       | TMC8         | -42.121021  | 0.000369 | 0.047314 |
| cg06051662 | X   | 153096786 | S_Shore       | PDZD4        | 26.6740666  | 0.000369 | 0.047314 |
| cg03642503 | 17  | 76899257  | S_Shore       | LOC100653515 | 59.7355004  | 0.000369 | 0.047314 |
| cg05245794 | 8   | 119884332 | Other         | NA           | -78.263733  | 0.000369 | 0.047314 |
| cg21060429 | 7   | 2280360   | N_Shore       | FTSJ2        | -131.48715  | 0.000369 | 0.047314 |
| cg13247398 | 11  | 46366840  | N_Shore       | DGKZ         | -51.105433  | 0.000369 | 0.047314 |
| cg11247497 | 4   | 183756392 | Other         | NA           | -61.0069    | 0.00037  | 0.047314 |
| cg00869668 | 17  | 1549012   | S_Shore       | SCARF1       | -30.660704  | 0.00037  | 0.047314 |
| cg22353096 | 2   | 100851666 | Other         | LOC150577    | -24.715651  | 0.00037  | 0.047314 |
| cg14311134 | 19  | 7414062   | Other         | NA           | -35.093557  | 0.00037  | 0.047326 |
| cg13599613 | 9   | 130524902 | Other         | SH2D3C       | -16.499419  | 0.000371 | 0.047371 |
| cg25736482 | 19  | 54677232  | Other         | TMC4         | -41.981913  | 0.000371 | 0.047371 |
| cg26037142 | 6   | 32097481  | N_Shore       | FKBPL        | 28.2292196  | 0.000371 | 0.047373 |
| cg20033981 | 13  | 41590153  | Other         | ELF1         | -29.650057  | 0.000371 | 0.0474   |
| cg19980148 | 14  | 39639590  | Island        | TRAPPC6B     | 946.863625  | 0.000372 | 0.047418 |
| cg23386659 | 19  | 840950    | N_Shelf       | PRTN3        | -50.035297  | 0.000372 | 0.047432 |
| cg23722096 | 7   | 127347748 | Other         | SND1         | 29.6035844  | 0.000372 | 0.047434 |
| cg17178748 | 13  | 43594122  | N_Shelf       | DNAJC15      | 38.0565985  | 0.000373 | 0.047444 |
| cg27269488 | 3   | 191048411 | S_Shore       | UTS2B        | 34.2309172  | 0.000373 | 0.047444 |
| cg08087655 | 11  | 122073541 | Other         | MIR100HG     | 42.8075137  | 0.000373 | 0.047444 |
| cg14478589 | 9   | 124086862 | Other         | GSN          | -52.575112  | 0.000373 | 0.047444 |
| cg14549256 | 4   | 2627142   | Other         | FAM193A      | 32.6250331  | 0.000373 | 0.047469 |
| cg24947456 | 12  | 57441432  | Other         | MYO1A        | -48.426251  | 0.000373 | 0.047469 |
| cg21133433 | 4   | 169991796 | Other         | NA           | 30.4205148  | 0.000374 | 0.047469 |
| cg07734926 | 6   | 28832358  | S_Shore       | LOC401242    | 34.7198305  | 0.000374 | 0.047469 |

Supplemental Table 1. 2,573 BMI-Associated Methylation Sites in the Normal Breast Study, adjusting for age, race, and alcohol use

| Probe      | CHR | MAPINFO   | CPG Location* | Gene     | Coefficient | p-value  | q-value  |
|------------|-----|-----------|---------------|----------|-------------|----------|----------|
| cg26583078 | 4   | 186877778 | Other         | SORBS2   | 25.7771471  | 0.000374 | 0.047492 |
| cg07620928 | 10  | 92689909  | Other         | NA       | 34.6272217  | 0.000374 | 0.047516 |
| cg04812726 | 5   | 171875049 | Other         | SH3PXD2B | 45.5790514  | 0.000375 | 0.047524 |
| cg18784903 | 7   | 1337353   | Island        | NA       | 29.4444291  | 0.000375 | 0.047533 |
| cg14017402 | 2   | 86225602  | Other         | NA       | 31.4577086  | 0.000375 | 0.047535 |
| cg20545409 | 11  | 87423941  | Other         | NA       | -32.328807  | 0.000376 | 0.04757  |
| cg21773297 | 8   | 2049910   | S_Shelf       | MYOM2    | -25.194834  | 0.000376 | 0.047584 |
| cg17460386 | 1   | 207095668 | Other         | FAIM3    | -36.021142  | 0.000376 | 0.047584 |
| cg01396774 | 2   | 218299024 | Other         | DIRC3    | 152.464196  | 0.000376 | 0.047584 |
| cg12159992 | 12  | 102059490 | Other         | MYBPC1   | -24.259264  | 0.000377 | 0.047589 |
| cg09262974 | 15  | 38478762  | Other         | NA       | -90.889178  | 0.000377 | 0.047589 |
| cg02307664 | 2   | 134586281 | Other         | NA       | 50.2717926  | 0.000377 | 0.047589 |
| cg02625536 | 20  | 47749901  | Other         | STAU1    | 72.6903141  | 0.000377 | 0.047589 |
| cg11460364 | 2   | 162931397 | S_Shore       | DPP4     | -36.413998  | 0.000377 | 0.047589 |
| cg10516359 | 11  | 45827763  | S_Shore       | SLC35C1  | 57.5693477  | 0.000377 | 0.047589 |
| cg17243643 | 12  | 56114269  | S_Shelf       | RDH5     | 22.8545651  | 0.000378 | 0.047589 |
| cg19251656 | 1   | 100000372 | Other         | NA       | -20.952064  | 0.000378 | 0.047589 |
| cg08595656 | 4   | 17723733  | Other         | FAM184B  | 54.6924246  | 0.000378 | 0.047603 |
| cg23976723 | 4   | 185872645 | N_Shore       | NA       | -166.8008   | 0.000378 | 0.04763  |
| cg18069290 | 12  | 58013539  | Island        | SLC26A10 | -38.734946  | 0.000379 | 0.04763  |
| cg04514998 | 11  | 108680123 | Other         | DDX10    | -41.383954  | 0.000379 | 0.04763  |
| cg19256813 | 12  | 117627286 | N_Shore       | FBXO21   | 33.9885769  | 0.000379 | 0.04763  |
| cg15616915 | 2   | 219266163 | S_Shore       | MIR26B   | 41.0152825  | 0.000379 | 0.047679 |
| cg14163484 | 2   | 97359926  | Other         | FER1L5   | -63.296631  | 0.00038  | 0.047679 |
| cg18786643 | 1   | 117129532 | Other         | IGSF3    | -40.24349   | 0.00038  | 0.047679 |
| cg25746394 | 19  | 45450501  | Other         | APOC2    | -70.532646  | 0.00038  | 0.047679 |
| cg20901787 | 17  | 79936477  | S_Shore       | ASPSCR1  | 57.9948879  | 0.00038  | 0.047693 |
| cg02768671 | 6   | 169470822 | Other         | NA       | 45.7941299  | 0.00038  | 0.047693 |
| cg13925432 | 9   | 110398260 | N_Shore       | NA       | -48.74684   | 0.000381 | 0.047693 |
| cg15922176 | 10  | 134096798 | S_Shore       | STK32C   | 45.0431868  | 0.000381 | 0.047693 |
| cg16371538 | 1   | 37940813  | S_Shore       | ZC3H12A  | 60.329592   | 0.000381 | 0.047693 |
| cg09218250 | 3   | 9943848   | Other         | IL17RE   | -43.137161  | 0.000381 | 0.047728 |
| cg25550753 | 2   | 47205281  | Other         | TTC7A    | -41.954437  | 0.000382 | 0.047811 |
| cg26466234 | 10  | 124264224 | Other         | HTRA1    | 40.108894   | 0.000383 | 0.047847 |
| cg18824446 | 15  | 89154058  | Other         | MIR7-2   | -23.067326  | 0.000383 | 0.047847 |
| cg15234197 | 11  | 68924956  | Island        | NA       | 33.9944597  | 0.000383 | 0.047887 |
| cg22631555 | 10  | 23216637  | Other         | ARMC3    | 89.7039299  | 0.000384 | 0.047948 |
| cg19005210 | 6   | 41168960  | Other         | TREML2   | -59.779698  | 0.000384 | 0.047957 |
| cg26723624 | 4   | 53700940  | Other         | NA       | -119.97408  | 0.000384 | 0.047978 |
| cg27391982 | 13  | 76957970  | Other         | NA       | 17.0466777  | 0.000385 | 0.047978 |
| cg13573928 | 4   | 169754534 | Island        | PALLD    | 38.2304332  | 0.000385 | 0.04799  |

Supplemental Table 1. 2,573 BMI-Associated Methylation Sites in the Normal Breast Study, adjusting for age, race, and alcohol use

| Probe      | CHR | MAPINFO   | CPG Location* | Gene     | Coefficient | p-value  | q-value  |
|------------|-----|-----------|---------------|----------|-------------|----------|----------|
| cg05947761 | 7   | 1734325   | Other         | NA       | 69.7833508  | 0.000385 | 0.04799  |
| cg26199631 | 2   | 239924551 | Other         | NA       | 31.471544   | 0.000385 | 0.04799  |
| cg17554875 | 5   | 179520998 | S_Shelf       | NA       | -43.262716  | 0.000385 | 0.04799  |
| cg02016178 | 16  | 3628416   | Other         | NLRC3    | -40.922401  | 0.000386 | 0.048018 |
| cg20444218 | 11  | 73024037  | S_Shelf       | ARHGEF17 | 58.299203   | 0.000386 | 0.048049 |
| cg25666403 | 22  | 30662994  | Other         | OSM      | -39.799787  | 0.000387 | 0.048049 |
| cg27534957 | 2   | 174265733 | Other         | NA       | -27.104325  | 0.000387 | 0.048049 |
| cg02878966 | X   | 24692176  | Other         | PCYT1B   | -51.093559  | 0.000387 | 0.048049 |
| cg09356916 | 4   | 23791473  | Other         | NA       | 25.72383    | 0.000387 | 0.048049 |
| cg06395232 | 12  | 15105654  | Other         | ARHGDI1B | -43.780127  | 0.000387 | 0.048049 |
| cg21484586 | 19  | 35531859  | Island        | HPN      | -46.616651  | 0.000388 | 0.048111 |
| cg09936919 | 2   | 19249137  | Other         | NA       | 47.6655388  | 0.000388 | 0.048145 |
| cg03939352 | 1   | 162346594 | Other         | C1orf111 | -103.05738  | 0.000389 | 0.048171 |
| cg24088042 | 3   | 126327440 | Other         | TXNRD3NB | 38.8885567  | 0.000389 | 0.048171 |
| cg17976873 | 14  | 23352295  | N_Shelf       | REM2     | 59.8086989  | 0.00039  | 0.04823  |
| cg02818170 | 19  | 3336941   | Other         | NA       | 36.7932406  | 0.00039  | 0.04823  |
| cg14426428 | 6   | 106961936 | S_Shore       | AIM1     | -26.688107  | 0.00039  | 0.04823  |
| cg18997124 | 6   | 31740268  | Other         | VWA7     | -38.077656  | 0.000391 | 0.048353 |
| cg03389133 | 22  | 37608611  | Other         | SSTR3    | 56.3687499  | 0.000391 | 0.048353 |
| cg00244001 | 10  | 126336805 | Other         | FAM53B   | -64.642988  | 0.000391 | 0.048353 |
| cg20866090 | 3   | 188537167 | Other         | LPP      | -62.832658  | 0.000392 | 0.048353 |
| cg22801799 | 8   | 134072526 | Other         | SLA      | -53.661692  | 0.000392 | 0.048353 |
| cg21184454 | X   | 19765879  | Other         | SH3KBP1  | -46.404903  | 0.000392 | 0.048353 |
| cg10371643 | 13  | 109807836 | Other         | MYO16    | -34.109047  | 0.000392 | 0.048353 |
| cg14260643 | 7   | 99277394  | Other         | CYP3A5   | 28.6726088  | 0.000392 | 0.048353 |
| cg07646714 | 11  | 34378884  | Island        | ABTB2    | -920.2845   | 0.000392 | 0.048353 |
| cg00852595 | 12  | 99548437  | Other         | ANKS1B   | 26.6922636  | 0.000393 | 0.048353 |
| cg03333377 | 11  | 93277841  | S_Shore       | SMCO4    | -18.992271  | 0.000393 | 0.048353 |
| cg19351638 | X   | 153170390 | Other         | AVPR2    | -69.682948  | 0.000393 | 0.048377 |
| cg26536240 | 16  | 89509760  | Other         | ANKRD11  | 26.320581   | 0.000393 | 0.048389 |
| cg14070162 | 17  | 40575582  | S_Shore       | PTRF     | 90.0032455  | 0.000394 | 0.048402 |
| cg19175386 | 12  | 115134496 | N_Shore       | NA       | -35.332195  | 0.000394 | 0.048402 |
| cg02543462 | 2   | 113885116 | Other         | IL1RN    | -52.439977  | 0.000394 | 0.048402 |
| cg15049549 | 3   | 48732213  | Other         | IP6K2    | 24.132114   | 0.000394 | 0.048437 |
| cg08590069 | 8   | 101118899 | S_Shore       | RGS22    | -40.495749  | 0.000395 | 0.048437 |
| cg24475517 | 2   | 118737667 | Other         | CCDC93   | -56.767744  | 0.000395 | 0.048437 |
| cg02367723 | 1   | 46378857  | Other         | MAST2    | 29.1779662  | 0.000395 | 0.048437 |
| cg24290574 | 3   | 148583152 | Other         | CPA3     | -29.546607  | 0.000395 | 0.048437 |
| cg21946299 | 3   | 12329166  | Island        | PPARG    | 101.956042  | 0.000395 | 0.048437 |
| cg05007997 | 2   | 219246985 | Other         | SLC11A1  | -55.427565  | 0.000395 | 0.048437 |
| cg02124912 | 1   | 202091933 | Other         | GPR37L1  | 33.2717274  | 0.000395 | 0.048437 |

Supplemental Table 1. 2,573 BMI-Associated Methylation Sites in the Normal Breast Study, adjusting for age, race, and alcohol use

| Probe      | CHR | MAPINFO   | CPG Location* | Gene           | Coefficient | p-value  | q-value  |
|------------|-----|-----------|---------------|----------------|-------------|----------|----------|
| cg16339434 | 11  | 2286788   | N_Shelf       | NA             | -23.731147  | 0.000396 | 0.048466 |
| cg21902474 | 5   | 150396984 | N_Shelf       | GPX3           | -34.100872  | 0.000396 | 0.048466 |
| cg17875922 | 6   | 37045823  | Other         | NA             | 53.3497343  | 0.000396 | 0.048496 |
| cg04886849 | 10  | 118997146 | N_Shelf       | SLC18A2        | -47.277532  | 0.000397 | 0.048579 |
| cg09472600 | 1   | 183537770 | Other         | NCF2           | -15.934396  | 0.000398 | 0.048586 |
| cg07053114 | 10  | 129794994 | Other         | PTPRE          | 29.9430397  | 0.000398 | 0.048595 |
| cg15426626 | 12  | 132984261 | Island        | NA             | 47.1545086  | 0.000398 | 0.048606 |
| cg10493436 | 1   | 161168957 | N_Shelf       | ADAMTS4        | 27.8414568  | 0.000398 | 0.048606 |
| cg08882904 | 19  | 13233291  | S_Shelf       | NACC1          | 51.3155393  | 0.000398 | 0.048606 |
| cg04536829 | 3   | 127771995 | S_Shore       | SEC61A1        | 107.502096  | 0.000399 | 0.048622 |
| cg19747945 | 6   | 42946146  | N_Shore       | PEX6           | 30.9735627  | 0.000399 | 0.048627 |
| cg04522671 | 5   | 139144055 | Island        | NA             | -73.040963  | 0.000399 | 0.048627 |
| cg03779374 | 3   | 114343825 | Other         | ZBTB20         | -32.01313   | 0.000399 | 0.048629 |
| cg06961205 | 6   | 6623143   | Other         | LY86-AS1       | 34.0033089  | 0.0004   | 0.048629 |
| cg19089617 | 2   | 42154188  | Other         | NA             | -40.36883   | 0.0004   | 0.048629 |
| cg23262488 | 2   | 112468472 | Other         | NA             | -42.812957  | 0.0004   | 0.048643 |
| cg09624923 | 10  | 33244211  | N_Shelf       | ITGB1          | 28.0553565  | 0.0004   | 0.04866  |
| cg13017813 | 14  | 77491023  | N_Shore       | IRF2BPL        | 26.8604441  | 0.000401 | 0.04866  |
| cg18229071 | 19  | 2695245   | Other         | GNG7           | -82.175221  | 0.000401 | 0.04866  |
| cg14630206 | 11  | 77121864  | N_Shore       | PAK1           | -41.235082  | 0.000401 | 0.048664 |
| cg18908499 | 1   | 247712237 | Other         | GCSAML         | -36.912497  | 0.000401 | 0.048664 |
| cg10927968 | 11  | 1807333   | Other         | NA             | -41.708789  | 0.000401 | 0.048684 |
| cg23840053 | 4   | 15940541  | Other         | FGFBP1         | -30.141508  | 0.000402 | 0.048684 |
| cg00694357 | 1   | 154976647 | S_Shore       | ZBTB7B         | 406.153838  | 0.000402 | 0.048684 |
| cg17311022 | 3   | 119379792 | Other         | POPDC2         | 30.2419837  | 0.000402 | 0.048684 |
| cg05626128 | 1   | 19251115  | Other         | IFFO2          | -89.285032  | 0.000402 | 0.048694 |
| cg15985132 | 11  | 130642799 | Other         | NA             | 16.6969043  | 0.000403 | 0.048714 |
| cg05034363 | 7   | 75443193  | Other         | CCL24          | -41.878802  | 0.000403 | 0.048714 |
| cg02358862 | 16  | 30197211  | S_Shore       | CORO1A         | -46.817154  | 0.000403 | 0.048789 |
| cg07691897 | 11  | 112000518 | Other         | NA             | -35.992953  | 0.000404 | 0.048806 |
| cg17232217 | 4   | 1203104   | Island        | SPON2          | 45.3659112  | 0.000404 | 0.048811 |
| cg23068939 | 1   | 112016586 | Other         | C1orf162       | -18.000005  | 0.000404 | 0.048816 |
| cg10082662 | 11  | 47282094  | Other         | NR1H3          | -74.634865  | 0.000405 | 0.048826 |
| cg13615971 | 15  | 92392821  | N_Shelf       | SLCO3A1        | -72.321061  | 0.000405 | 0.048826 |
| cg24134261 | 2   | 33661362  | Other         | RASGRP3        | -24.373198  | 0.000405 | 0.048841 |
| cg01747518 | 14  | 103994927 | N_Shore       | TRMT61A        | 31.1547402  | 0.000405 | 0.048841 |
| cg16904686 | 1   | 47133294  | N_Shore       | ATPAF1         | 47.4559773  | 0.000405 | 0.048842 |
| cg08450965 | 21  | 46677779  | Island        | NA             | 69.9166895  | 0.000405 | 0.048842 |
| cg03593014 | 10  | 98977821  | Other         | ARHGAP19-SLIT1 | -23.733957  | 0.000406 | 0.048867 |
| cg10987682 | 2   | 23509827  | Other         | NA             | 38.9098375  | 0.000406 | 0.048908 |
| cg11525210 | 5   | 149445234 | Other         | CSF1R          | -63.711638  | 0.000407 | 0.048932 |

Supplemental Table 1. 2,573 BMI-Associated Methylation Sites in the Normal Breast Study, adjusting for age, race, and alcohol use

| Probe      | CHR | MAPINFO   | CPG Location* | Gene      | Coefficient | p-value  | q-value  |
|------------|-----|-----------|---------------|-----------|-------------|----------|----------|
| cg09715059 | 6   | 32223336  | Other         | NA        | 70.7874092  | 0.000407 | 0.048935 |
| cg17550495 | 4   | 39364570  | N_Shelf       | RFC1      | 27.553313   | 0.000407 | 0.048952 |
| cg05206657 | 15  | 70328301  | S_Shore       | NA        | -57.525448  | 0.000408 | 0.049009 |
| cg13987606 | 1   | 160002698 | S_Shore       | PIGM      | 22.2661776  | 0.000408 | 0.049009 |
| cg01790438 | 5   | 10332117  | N_Shore       | NA        | 42.4002706  | 0.000409 | 0.049011 |
| cg01269718 | 18  | 13869025  | Island        | NA        | 240.156582  | 0.000409 | 0.049011 |
| cg13505631 | 9   | 127018840 | N_Shore       | NEK6      | -37.407939  | 0.000409 | 0.049011 |
| cg25343227 | 22  | 42353589  | N_Shore       | LINC00634 | 49.6488542  | 0.000409 | 0.049011 |
| cg25076039 | 5   | 169128937 | Other         | DOCK2     | 32.4707997  | 0.000409 | 0.049011 |
| cg26058884 | 6   | 30579440  | Other         | PPP1R10   | 23.2516452  | 0.000409 | 0.049011 |
| cg21720385 | 19  | 4455239   | N_Shelf       | UBXN6     | 38.8126276  | 0.00041  | 0.049011 |
| cg16399624 | 10  | 134553188 | N_Shore       | INPP5A    | -68.359643  | 0.00041  | 0.049011 |
| cg23687971 | 20  | 32262772  | N_Shore       | NECAB3    | 131.238479  | 0.00041  | 0.049011 |
| cg26246740 | 10  | 49893026  | Other         | WDFY4     | -61.713045  | 0.00041  | 0.049011 |
| cg02179700 | 10  | 3336162   | Other         | NA        | 27.1818088  | 0.00041  | 0.049011 |
| cg18558108 | 8   | 131439096 | Other         | ASAP1     | -84.154505  | 0.00041  | 0.049011 |
| cg10905593 | 10  | 102027479 | Island        | CWF19L1   | 449.129261  | 0.000411 | 0.049011 |
| cg23965459 | 14  | 104647094 | S_Shore       | KIF26A    | 34.0845115  | 0.000411 | 0.049011 |
| cg20714328 | 5   | 79331850  | S_Shore       | THBS4     | -43.809334  | 0.000411 | 0.049011 |
| cg15890075 | 17  | 18011923  | Other         | MYO15A    | 67.2733956  | 0.000411 | 0.049011 |
| cg14916108 | 12  | 2027993   | Other         | CACNA2D4  | -58.441764  | 0.000411 | 0.049011 |
| cg07702311 | 11  | 128646953 | Other         | FLI1      | 29.1008104  | 0.000411 | 0.049011 |
| cg15083578 | 3   | 44450272  | Other         | TCAIM     | -67.173081  | 0.000412 | 0.049011 |
| cg01085165 | 16  | 4426401   | Other         | VASN      | 33.1493033  | 0.000412 | 0.049011 |
| cg10964627 | 3   | 65985404  | Other         | MAGI1     | -42.399567  | 0.000412 | 0.049011 |
| cg09288273 | 5   | 156886816 | N_Shore       | NIPAL4    | -46.855315  | 0.000412 | 0.049011 |
| cg03044513 | 11  | 116706153 | N_Shore       | APOA1     | -25.296207  | 0.000412 | 0.049011 |
| cg09354037 | 6   | 32813531  | S_Shore       | PSMB8     | -43.054082  | 0.000413 | 0.049011 |
| cg10283036 | 12  | 111853088 | N_Shelf       | SH2B3     | -74.455265  | 0.000413 | 0.049011 |
| cg02713832 | 11  | 60772559  | N_Shelf       | CD6       | 25.1581413  | 0.000413 | 0.049011 |
| cg27438980 | 15  | 99195143  | S_Shore       | IGF1R     | 20.0007364  | 0.000413 | 0.049011 |
| cg00861207 | 4   | 8098270   | N_Shore       | ABLIM2    | -67.935578  | 0.000413 | 0.049011 |
| cg01912298 | 17  | 4872499   | S_Shore       | SPAG7     | 35.0733017  | 0.000414 | 0.049011 |
| cg15135286 | 2   | 33359281  | Other         | LTBP1     | 25.015047   | 0.000414 | 0.049011 |
| cg17653203 | 4   | 2933715   | Island        | MFSD10    | -23.90398   | 0.000414 | 0.049011 |
| cg16007497 | 4   | 74713356  | Other         | NA        | -41.226429  | 0.000414 | 0.049011 |
| cg09530438 | 10  | 106095350 | N_Shelf       | ITPRIP    | -72.711707  | 0.000414 | 0.049011 |
| cg23304605 | 14  | 91866373  | Other         | CCDC88C   | -39.573033  | 0.000414 | 0.049011 |
| cg01256232 | 14  | 40337190  | Other         | NA        | 25.9648522  | 0.000414 | 0.049011 |
| cg05825700 | 8   | 99440522  | S_Shore       | KCNS2     | -89.462063  | 0.000414 | 0.049011 |
| cg03298716 | 6   | 168196351 | N_Shore       | C6orf123  | -55.079623  | 0.000415 | 0.049016 |

Supplemental Table 1. 2,573 BMI-Associated Methylation Sites in the Normal Breast Study, adjusting for age, race, and alcohol use

| Probe      | CHR | MAPINFO   | CPG Location* | Gene      | Coefficient | p-value  | q-value  |
|------------|-----|-----------|---------------|-----------|-------------|----------|----------|
| cg22066894 | 11  | 126581972 | Other         | KIRREL3   | -26.741755  | 0.000415 | 0.04905  |
| cg14171527 | 21  | 44473840  | Island        | CBS       | -48.27873   | 0.000416 | 0.0491   |
| cg14301190 | 16  | 31159704  | Island        | PRSS36    | 49.0637037  | 0.000416 | 0.049167 |
| cg23225508 | 17  | 62500377  | N_Shore       | DDX5      | 35.8868423  | 0.000417 | 0.049186 |
| cg14729344 | 10  | 121129753 | Other         | GRK5      | -31.823492  | 0.000417 | 0.049205 |
| cg04926904 | 10  | 14529831  | Other         | NA        | 42.2350631  | 0.000418 | 0.049205 |
| cg02792168 | 10  | 101281924 | Island        | NA        | 48.2987568  | 0.000418 | 0.049205 |
| cg11077392 | 11  | 19719446  | Other         | NAV2      | 47.6794245  | 0.000418 | 0.049205 |
| cg09470638 | 19  | 15121509  | N_Shore       | CCDC105   | 37.9898932  | 0.000418 | 0.049205 |
| cg17499826 | 19  | 46284986  | S_Shore       | DMPK      | 44.71164    | 0.000418 | 0.049205 |
| cg02804819 | 19  | 49238364  | N_Shore       | RASIP1    | 40.2480263  | 0.000418 | 0.049205 |
| cg08721931 | 2   | 110874344 | S_Shore       | MALL      | -46.004088  | 0.000419 | 0.049205 |
| cg14164816 | 1   | 91483823  | N_Shelf       | ZNF644    | -24.502198  | 0.000419 | 0.049205 |
| cg17644856 | 2   | 10687962  | Other         | NA        | -41.733526  | 0.000419 | 0.049205 |
| cg18397730 | 6   | 52439185  | N_Shelf       | TRAM2     | 36.9071048  | 0.000419 | 0.049205 |
| cg02950701 | 10  | 35656925  | Other         | CCNY      | 32.7743637  | 0.000419 | 0.049205 |
| cg12424867 | 1   | 19752812  | Other         | CAPZB     | 38.2588552  | 0.000419 | 0.049211 |
| cg20156545 | 21  | 28335020  | N_Shelf       | ADAMTS5   | 26.5440795  | 0.000419 | 0.049226 |
| cg27250037 | 20  | 35471692  | S_Shelf       | SOGA1     | -38.314166  | 0.00042  | 0.049247 |
| cg21236860 | 7   | 66766855  | N_Shore       | PMS2P4    | 24.0121714  | 0.00042  | 0.049247 |
| cg23406509 | 17  | 31479452  | Other         | ASIC2     | -52.388555  | 0.00042  | 0.049247 |
| cg23943268 | 13  | 33589621  | N_Shore       | KL        | -30.81731   | 0.00042  | 0.049247 |
| cg12423658 | 13  | 111318555 | Other         | CARS2     | -66.460083  | 0.000421 | 0.049247 |
| cg14288403 | 1   | 28503368  | Other         | PTAFR     | -48.928607  | 0.000421 | 0.049265 |
| cg23035241 | 5   | 142594147 | Other         | ARHGAP26  | -79.554943  | 0.000421 | 0.049279 |
| cg02431531 | 16  | 59244939  | Other         | NA        | 27.6667615  | 0.000422 | 0.049313 |
| cg14671926 | 6   | 169930772 | Other         | WDR27     | 43.0718287  | 0.000422 | 0.049313 |
| cg17056607 | 17  | 72709096  | Other         | CD300LF   | -45.310623  | 0.000422 | 0.049313 |
| cg11182257 | 10  | 118652981 | Other         | KIAA1598  | -28.510704  | 0.000422 | 0.049313 |
| cg18750833 | 2   | 71358451  | S_Shore       | MPHOSPH10 | 24.8769893  | 0.000423 | 0.049313 |
| cg10111629 | 1   | 113067124 | Other         | ST7L      | 36.9459246  | 0.000423 | 0.049313 |
| cg27157050 | 22  | 42563204  | Other         | TCF20     | 89.3605189  | 0.000424 | 0.049313 |
| cg18336453 | 6   | 43082296  | Other         | PTK7      | 48.7737553  | 0.000424 | 0.049313 |
| cg14622443 | 17  | 60886038  | S_Shore       | 10-Mar    | 41.7266302  | 0.000424 | 0.049313 |
| cg20525037 | 3   | 64203257  | Other         | PRICKLE2  | 82.842968   | 0.000424 | 0.049313 |
| cg16671238 | 13  | 20987145  | N_Shore       | CRYL1     | -61.584221  | 0.000424 | 0.049313 |
| cg01430385 | 10  | 1033349   | N_Shore       | GTPBP4    | 34.219705   | 0.000425 | 0.049313 |
| cg14654385 | 11  | 63973006  | N_Shore       | FERMT3    | -66.977713  | 0.000425 | 0.049313 |
| cg16346032 | 1   | 180100912 | Other         | NA        | -26.04585   | 0.000425 | 0.049313 |
| cg11147471 | 12  | 125087686 | Other         | NA        | -36.860247  | 0.000425 | 0.049313 |
| cg03732056 | 8   | 21771059  | S_Shore       | DOK2      | -21.581031  | 0.000425 | 0.049313 |

Supplemental Table 1. 2,573 BMI-Associated Methylation Sites in the Normal Breast Study, adjusting for age, race, and alcohol use

| Probe      | CHR | MAPINFO   | CPG Location* | Gene     | Coefficient | p-value  | q-value  |
|------------|-----|-----------|---------------|----------|-------------|----------|----------|
| cg03763077 | 2   | 74231297  | S_Shore       | NA       | 31.5508973  | 0.000425 | 0.049313 |
| cg06096446 | 6   | 158744008 | Other         | TULP4    | -132.0494   | 0.000425 | 0.049313 |
| cg19797956 | 4   | 879432    | S_Shore       | GAK      | 98.1470855  | 0.000426 | 0.049313 |
| cg06015525 | 12  | 57872123  | S_Shore       | ARHGAP9  | -51.061895  | 0.000426 | 0.049313 |
| cg27097846 | 12  | 53443485  | S_Shore       | TENC1    | 46.8130332  | 0.000426 | 0.049313 |
| cg13721589 | 17  | 17716006  | Island        | MIR33B   | 25.245529   | 0.000426 | 0.049313 |
| cg07873154 | 6   | 30122544  | Other         | TRIM10   | 26.9739037  | 0.000426 | 0.049313 |
| cg12544957 | 13  | 60587190  | Other         | DIAPH3   | 268.484112  | 0.000426 | 0.049313 |
| cg11812748 | 1   | 246733057 | S_Shelf       | CNST     | -27.625814  | 0.000426 | 0.049313 |
| cg23275958 | 17  | 75503249  | Other         | NA       | -58.768032  | 0.000426 | 0.049313 |
| cg10098221 | 4   | 53523482  | N_Shore       | USP46    | 25.9947644  | 0.000426 | 0.049328 |
| cg14520957 | 1   | 154179856 | Other         | C1orf189 | 95.5195843  | 0.000427 | 0.049328 |
| cg13611006 | 17  | 45983023  | Other         | SP2      | 39.0534024  | 0.000427 | 0.049328 |
| cg00496026 | 10  | 102766610 | Island        | LZTS2    | 63.4628051  | 0.000427 | 0.049333 |
| cg15615645 | 10  | 104543040 | Other         | WBP1L    | 33.6327253  | 0.000427 | 0.049352 |
| cg19251564 | 6   | 166418922 | N_Shelf       | NA       | 33.170832   | 0.000428 | 0.049389 |
| cg20124551 | 11  | 120439522 | S_Shelf       | NA       | -49.441096  | 0.000428 | 0.049389 |
| cg25064052 | 4   | 166216151 | Other         | KLHL2    | -32.362444  | 0.000428 | 0.049389 |
| cg09118048 | 7   | 2048663   | S_Shelf       | MAD1L1   | -95.624878  | 0.000428 | 0.049389 |
| cg12655251 | 1   | 53992565  | Other         | GLIS1    | 73.0411472  | 0.000428 | 0.049389 |
| cg15568628 | 1   | 59529453  | Other         | NA       | -21.328721  | 0.000429 | 0.049389 |
| cg25924688 | 15  | 72977851  | N_Shore       | HIGD2B   | 19.9390909  | 0.000429 | 0.049389 |
| cg25093045 | 4   | 5990638   | Other         | NA       | 33.6502895  | 0.000429 | 0.049389 |
| cg20144984 | 1   | 38604476  | Other         | NA       | 32.221244   | 0.00043  | 0.049389 |
| cg12397205 | 11  | 1244002   | N_Shelf       | MUC5B    | 38.6951169  | 0.00043  | 0.049389 |
| cg27138390 | X   | 147279853 | Other         | NA       | 48.3252579  | 0.00043  | 0.049389 |
| cg10085474 | 4   | 1221935   | Island        | CTBP1    | -49.390527  | 0.00043  | 0.049389 |
| cg00336149 | 3   | 53700195  | Other         | CACNA1D  | -31.671099  | 0.00043  | 0.049389 |
| cg11961813 | 17  | 40995546  | Other         | AOC2     | 151.144209  | 0.000431 | 0.049389 |
| cg13327134 | 12  | 53618407  | S_Shelf       | RARG     | 38.7088121  | 0.000431 | 0.049389 |
| cg12687767 | 20  | 19870109  | Other         | RIN2     | 49.1291153  | 0.000431 | 0.049389 |
| cg25291551 | 11  | 46402666  | Island        | MDK      | 2287.80731  | 0.000431 | 0.049389 |
| cg01132064 | 11  | 46382562  | Other         | DGKZ     | -35.41857   | 0.000431 | 0.049389 |
| cg11707445 | 1   | 156889964 | N_Shore       | LRRC71   | 74.384639   | 0.000431 | 0.049389 |
| cg07062388 | 6   | 70507787  | S_Shore       | LMBRD1   | 58.9328226  | 0.000431 | 0.049389 |
| cg18854666 | 2   | 219247055 | Other         | SLC11A1  | -51.872181  | 0.000431 | 0.049389 |
| cg00748218 | 11  | 19372553  | Other         | NAV2     | 43.335719   | 0.000432 | 0.049389 |
| cg26696162 | 6   | 151709522 | N_Shore       | ZBTB2    | -64.442789  | 0.000432 | 0.049389 |
| cg26683005 | 19  | 48752990  | Other         | CARD8    | -33.569298  | 0.000432 | 0.049389 |
| cg19476186 | 20  | 3869959   | Island        | PANK2    | 1266.57025  | 0.000433 | 0.049389 |
| cg18397726 | 14  | 93395464  | Other         | CHGA     | -96.052516  | 0.000433 | 0.049389 |

Supplemental Table 1. 2,573 BMI-Associated Methylation Sites in the Normal Breast Study, adjusting for age, race, and alcohol use

| Probe      | CHR | MAPINFO   | CPG Location* | Gene      | Coefficient | p-value  | q-value  |
|------------|-----|-----------|---------------|-----------|-------------|----------|----------|
| cg18797590 | 4   | 15480643  | Other         | CC2D2A    | 23.3492866  | 0.000433 | 0.049389 |
| cg27052183 | 11  | 66411986  | S_Shore       | RBM4      | 37.1663748  | 0.000433 | 0.049389 |
| cg11953913 | 5   | 139562873 | Other         | CYSTM1    | -42.827189  | 0.000433 | 0.049389 |
| cg18066206 | 22  | 46459890  | S_Shore       | NA        | 22.0781108  | 0.000433 | 0.049389 |
| cg14647287 | 4   | 6927183   | S_Shore       | TBC1D14   | -56.310867  | 0.000434 | 0.049389 |
| cg11219614 | 8   | 49984776  | Other         | C8orf22   | 30.7204216  | 0.000434 | 0.049389 |
| cg12086464 | 4   | 2814064   | Other         | SH3BP2    | -18.648676  | 0.000434 | 0.049389 |
| cg24644436 | 10  | 135202906 | N_Shore       | MTG1      | -27.862546  | 0.000434 | 0.049389 |
| cg17342247 | 17  | 3540594   | S_Shore       | CTNS      | 90.3099261  | 0.000434 | 0.049389 |
| cg26892635 | 16  | 3253043   | Other         | OR1F1     | 109.832215  | 0.000434 | 0.049389 |
| cg15202213 | 11  | 641042    | S_Shore       | DRD4      | -40.901526  | 0.000434 | 0.049389 |
| cg13830300 | 17  | 41822900  | Other         | NA        | -18.757426  | 0.000434 | 0.049389 |
| cg13577072 | 11  | 2715286   | Other         | KCNQ1OT1  | 67.2862012  | 0.000434 | 0.049389 |
| cg08698854 | 7   | 134575306 | Other         | CALD1     | 16.2788283  | 0.000435 | 0.049389 |
| cg22791932 | 16  | 88537374  | Island        | MIR5189   | -80.493705  | 0.000435 | 0.049389 |
| cg19731612 | 5   | 176559334 | Island        | NSD1      | 83.8710088  | 0.000435 | 0.049389 |
| cg06881695 | 6   | 30168773  | Other         | TRIM26    | -33.926928  | 0.000435 | 0.049396 |
| cg12193327 | 2   | 31454631  | N_Shelf       | EHD3      | -37.284339  | 0.000435 | 0.049396 |
| cg22696167 | 15  | 96864283  | N_Shore       | NR2F2     | -45.517368  | 0.000436 | 0.049396 |
| cg15648896 | 15  | 39542877  | Other         | C15orf54  | -34.26585   | 0.000436 | 0.049396 |
| cg04735908 | 14  | 23538430  | Other         | ACIN1     | 293.855053  | 0.000436 | 0.049396 |
| cg06314111 | 12  | 58119915  | Island        | AGAP2-AS1 | 42.2394398  | 0.000437 | 0.049396 |
| cg01292625 | 10  | 88157172  | N_Shelf       | NA        | -81.644677  | 0.000437 | 0.049396 |
| cg19856273 | 1   | 46668472  | N_Shore       | LURAP1    | 26.423156   | 0.000437 | 0.049396 |
| cg01873886 | 14  | 54419825  | N_Shore       | BMP4      | 127.27745   | 0.000437 | 0.049396 |
| cg17271561 | 19  | 52839334  | N_Shore       | ZNF610    | 313.664897  | 0.000437 | 0.049396 |
| cg18418655 | X   | 70331557  | Other         | IL2RG     | -46.590351  | 0.000438 | 0.049396 |
| cg26959945 | 7   | 20233217  | Other         | MACC1     | -17.888543  | 0.000438 | 0.049396 |
| cg10864791 | 13  | 22178445  | Island        | MICU2     | 411.610504  | 0.000438 | 0.049396 |
| cg05293299 | 3   | 29374128  | Other         | RBMS3     | 21.0781102  | 0.000438 | 0.049396 |
| cg04764597 | 10  | 63510947  | Other         | C10orf107 | -63.949364  | 0.000438 | 0.049396 |
| cg25745746 | 1   | 20617452  | Other         | VWA5B1    | -40.657994  | 0.000438 | 0.049396 |
| cg03032798 | 2   | 221298903 | Other         | NA        | -38.061816  | 0.000439 | 0.049396 |
| cg07187855 | 6   | 30854161  | S_Shore       | DDR1      | 43.8641634  | 0.000439 | 0.049396 |
| cg14884929 | 17  | 46657656  | N_Shore       | MIR10A    | -37.350654  | 0.000439 | 0.049396 |
| cg25649895 | 17  | 48356195  | Other         | TMEM92    | -63.931542  | 0.000439 | 0.049396 |
| cg23929682 | 11  | 2321842   | Other         | C11orf21  | -41.33746   | 0.000439 | 0.049396 |
| cg05519002 | 11  | 8104458   | S_Shore       | TUB       | 41.8467496  | 0.000439 | 0.049396 |
| cg20305578 | 8   | 1908301   | Other         | NA        | -39.747102  | 0.000439 | 0.049396 |
| cg05608790 | 7   | 69427388  | Other         | AUTS2     | -38.279833  | 0.00044  | 0.049424 |
| cg01122304 | 4   | 2845576   | Island        | ADD1      | 659.817799  | 0.000441 | 0.049424 |

Supplemental Table 1. 2,573 BMI-Associated Methylation Sites in the Normal Breast Study, adjusting for age, race, and alcohol use

| Probe      | CHR | MAPINFO   | CPG Location* | Gene     | Coefficient | p-value  | q-value  |
|------------|-----|-----------|---------------|----------|-------------|----------|----------|
| cg07685357 | 11  | 121971954 | Other         | MIR125B1 | 29.923283   | 0.000441 | 0.049424 |
| cg02086820 | 16  | 88698611  | N_Shore       | NA       | -91.511924  | 0.000441 | 0.049424 |
| cg24159636 | 6   | 18043467  | Other         | NA       | 33.3827519  | 0.000441 | 0.049424 |
| cg19755003 | 22  | 46489736  | Other         | MIR3619  | 40.3296017  | 0.000441 | 0.049424 |
| cg23729881 | 3   | 13057184  | Other         | IQSEC1   | -34.629576  | 0.000441 | 0.049424 |
| cg05894801 | 6   | 155850469 | Other         | NA       | -17.691393  | 0.000441 | 0.049424 |
| cg26250461 | 5   | 19734126  | Other         | CDH18    | 76.6763664  | 0.000441 | 0.049424 |
| cg10782218 | 17  | 61518489  | S_Shelf       | CYB561   | -55.298291  | 0.000441 | 0.049424 |
| cg23965588 | 11  | 71699167  | Other         | RNF121   | 25.9553177  | 0.000441 | 0.049424 |
| cg04071967 | 17  | 53511321  | Other         | NA       | -32.215793  | 0.000442 | 0.049424 |
| cg14517126 | 15  | 41923323  | Other         | NA       | -38.967872  | 0.000442 | 0.049424 |
| cg07099073 | 6   | 44593284  | Other         | NA       | 46.3458449  | 0.000442 | 0.049456 |
| cg04468671 | 12  | 132337407 | S_Shelf       | NA       | -56.807693  | 0.000442 | 0.049456 |
| cg02919122 | 3   | 112109797 | Other         | NA       | 135.470625  | 0.000443 | 0.049456 |
| cg04561571 | 12  | 93834146  | N_Shore       | UBE2N    | 36.0293313  | 0.000443 | 0.049456 |
| cg11599981 | 19  | 6475902   | Island        | DENND1C  | 43.9405412  | 0.000443 | 0.049461 |
| cg00593773 | 18  | 77336201  | Island        | NA       | 19.3408829  | 0.000444 | 0.049515 |
| cg19984681 | 3   | 64479957  | Other         | NA       | -45.421572  | 0.000444 | 0.049515 |
| cg03306368 | 6   | 99396091  | S_Shore       | FBXL4    | 72.1068436  | 0.000444 | 0.049515 |
| cg25113360 | 11  | 120530355 | Other         | GRIK4    | -38.451794  | 0.000444 | 0.049515 |
| cg23000806 | 8   | 48854968  | Other         | PRKDC    | 19.8134686  | 0.000444 | 0.049515 |
| cg02271790 | 6   | 10381196  | N_Shore       | NA       | -21.764427  | 0.000445 | 0.049519 |
| cg14596589 | 5   | 1107148   | N_Shore       | SLC12A7  | -74.855242  | 0.000445 | 0.049519 |
| cg20759486 | 6   | 30951225  | Other         | MUC21    | -65.162216  | 0.000445 | 0.04952  |
| cg05612839 | 16  | 85768907  | Other         | C16orf74 | -49.602394  | 0.000445 | 0.04952  |
| cg17398233 | 2   | 136876887 | Island        | CXCR4    | 1596.16044  | 0.000445 | 0.04952  |
| cg03569637 | 12  | 47609357  | Other         | PCED1B   | -45.275736  | 0.000445 | 0.04952  |
| cg08275633 | 1   | 11751631  | Island        | MAD2L2   | 281.755706  | 0.000446 | 0.04952  |
| cg03437770 | 16  | 12442738  | Other         | SNX29    | -41.704234  | 0.000446 | 0.04952  |
| cg03872934 | 6   | 33151135  | Other         | COL11A2  | -28.63752   | 0.000446 | 0.049539 |
| cg03485217 | 4   | 10686300  | Other         | CLNK     | -45.259411  | 0.000446 | 0.049539 |
| cg12103569 | 12  | 132258560 | Other         | SFSWAP   | -42.090108  | 0.000447 | 0.049567 |
| cg25488990 | 12  | 65668614  | N_Shelf       | MSRB3    | -44.911506  | 0.000447 | 0.049609 |
| cg19339179 | 4   | 113324678 | Other         | ALPK1    | 35.8923477  | 0.000447 | 0.049609 |
| cg27091343 | 6   | 30130226  | Other         | TRIM15   | -37.846724  | 0.000447 | 0.049609 |
| cg20343063 | 11  | 57089744  | N_Shore       | TNKS1BP1 | 21.4068712  | 0.000448 | 0.049624 |
| cg25110757 | 14  | 95065642  | Other         | NA       | 70.9521325  | 0.000448 | 0.049624 |
| cg24509919 | 1   | 168230886 | Other         | NA       | 36.7501656  | 0.000448 | 0.049624 |
| cg04561731 | 1   | 54869371  | N_Shore       | SSBP3    | 37.06632    | 0.000449 | 0.049645 |
| cg00907204 | 7   | 92461971  | N_Shore       | CDK6     | 79.9469127  | 0.000449 | 0.049645 |
| cg10570158 | 11  | 19546133  | Other         | NAV2-AS4 | 24.571275   | 0.000449 | 0.049652 |

Supplemental Table 1. 2,573 BMI-Associated Methylation Sites in the Normal Breast Study, adjusting for age, race, and alcohol use

| Probe      | CHR | MAPINFO   | CPG Location* | Gene       | Coefficient | p-value  | q-value  |
|------------|-----|-----------|---------------|------------|-------------|----------|----------|
| cg26525025 | 12  | 52521183  | Other         | NA         | -37.043322  | 0.000449 | 0.049685 |
| cg24144893 | 1   | 45480507  | S_Shelf       | UROD       | 127.13542   | 0.00045  | 0.049717 |
| cg26279216 | 10  | 131506261 | Other         | MGMT       | 20.2308977  | 0.00045  | 0.04975  |
| cg19714332 | 13  | 80058898  | S_Shelf       | NDFIP2-AS1 | -36.465465  | 0.000451 | 0.049764 |
| cg11264392 | 19  | 15564092  | Island        | WIZ        | 59.6801633  | 0.000451 | 0.049789 |
| cg02228160 | 5   | 143192067 | Other         | HMHB1      | -32.678078  | 0.000452 | 0.049789 |
| cg00002426 | 3   | 57743543  | S_Shore       | SLMAP      | 22.9748243  | 0.000452 | 0.049789 |
| cg18493214 | 6   | 17764205  | Other         | KIF13A     | -63.87837   | 0.000452 | 0.049789 |
| cg23176340 | 15  | 89154196  | Other         | MIR7-2     | -21.257253  | 0.000452 | 0.049789 |
| cg04388657 | 9   | 127623377 | N_Shore       | RPL35      | 24.0190662  | 0.000452 | 0.049789 |
| cg02780017 | 11  | 64981227  | Other         | SLC22A20   | -40.642036  | 0.000453 | 0.049789 |
| cg18935453 | 11  | 68167030  | Other         | LRP5       | 33.0344303  | 0.000453 | 0.049789 |
| cg08882341 | 6   | 166470330 | Other         | NA         | 25.7153104  | 0.000453 | 0.049789 |
| cg05935800 | 1   | 226023590 | Other         | EPHX1      | 35.3940881  | 0.000453 | 0.049789 |
| cg11648522 | 1   | 15272238  | Other         | KAZN       | 40.8080212  | 0.000454 | 0.049789 |
| cg25858160 | 20  | 55499436  | N_Shore       | NA         | -47.673483  | 0.000454 | 0.049789 |
| cg04601383 | 19  | 6713459   | S_Shelf       | C3         | -88.46441   | 0.000454 | 0.049789 |
| cg17753974 | 1   | 201622519 | S_Shelf       | NAV1       | -35.248181  | 0.000454 | 0.049789 |
| cg13397898 | 9   | 133768931 | Other         | QRFP       | -29.180027  | 0.000454 | 0.049789 |
| cg15220969 | 21  | 44819112  | Island        | NA         | -48.489815  | 0.000454 | 0.049789 |
| cg08870914 | 17  | 15281288  | Other         | NA         | 22.3819412  | 0.000454 | 0.049789 |
| cg08755743 | 3   | 128205418 | N_Shore       | GATA2      | 54.9577358  | 0.000454 | 0.049789 |
| cg05497216 | 16  | 89408076  | N_Shore       | ANKRD11    | 58.1218425  | 0.000454 | 0.049789 |
| cg13092738 | 8   | 124498970 | Other         | NA         | 52.208202   | 0.000455 | 0.049789 |
| cg13914531 | 7   | 128579876 | S_Shore       | IRF5       | -46.914708  | 0.000455 | 0.049789 |
| cg12706938 | 19  | 1566839   | Island        | MEX3D      | 34.1370386  | 0.000455 | 0.049789 |
| cg01206970 | 19  | 49621187  | N_Shore       | C19orf73   | -66.153541  | 0.000455 | 0.049789 |
| cg14519356 | 7   | 83097669  | Other         | SEMA3E     | -52.499948  | 0.000455 | 0.049789 |
| cg21814870 | 4   | 62383240  | Island        | LPHN3      | -37.126623  | 0.000456 | 0.04981  |
| cg23595304 | 11  | 46879516  | Other         | LRP4-AS1   | -32.291251  | 0.000456 | 0.04981  |
| cg12166018 | 15  | 72564196  | N_Shore       | PARP6      | 41.0268861  | 0.000456 | 0.04981  |
| cg13745692 | 3   | 60065489  | Other         | FHIT       | 38.4541735  | 0.000456 | 0.04981  |
| cg02773868 | 6   | 30522774  | N_Shore       | PRR3       | 64.896738   | 0.000457 | 0.049867 |
| cg08575819 | 6   | 31740291  | Other         | VWA7       | -48.851039  | 0.000457 | 0.049878 |
| cg24709951 | 17  | 73033009  | S_Shore       | NA         | -17.921248  | 0.000457 | 0.049878 |
| cg08133755 | 11  | 19792080  | Other         | NAV2       | 31.3386569  | 0.000457 | 0.049878 |

\*N\_Shore = North shore; N\_Shelf = North shelf; S\_Shore = South shore; S\_Shelf = South shelf; Other = Not in or near a CpG Island
