# Supplementary material
Source: PubMed Central journal article supplement (PMC4474159)
Supplement: NIHMS688723-supplement-10549_2015_3401_MOESM3_ESM.pdf [file NIHMS688723-supplement-10549_2015_3401_MOESM3_ESM.pdf]

Body Mass Index Associated with Genome-Wide Methylation in Breast Tissue. *Breast Cancer Research and Treatment* . Hair BY, Xu Z, Kirk E, Harlid S, Sandhu R, Robinson WR, Wu MC, Olshan AF, Conway K, Taylor JA, Troester MA. Corresponding author affiliation: University of North Carolina at Chapel Hill. Corresponding author email: bhair@email.unc.edu

Supplemental Table 3. Genes overlapping with BMI-associated genes from published studies\*

| <b>Genes<br/>Overlapping with<br/>Creighton et al.</b> | <b>Genes Overlapping<br/>with Sun et al.</b> |
|--------------------------------------------------------|----------------------------------------------|
| ADI1                                                   | ABCC9                                        |
| ARHGEF12                                               | AGAP2-AS1                                    |
| ATXN7                                                  | ARRDC1                                       |
| CCDC93                                                 | C1orf106                                     |
| CDH18                                                  | CACNA1C                                      |
| CEP350                                                 | CCDC28B                                      |
| CTBP2                                                  | CCDC80                                       |
| CYP3A5                                                 | CD6                                          |
| DDX5                                                   | CD82                                         |
| DIP2C                                                  | CKMT2                                        |
| DRD4                                                   | CNTNAP2                                      |
| DYNC1H1                                                | COL11A2                                      |
| EPM2AIP1                                               | COL23A1                                      |
| FBLN1                                                  | COL9A2                                       |
| FBXO21                                                 | CTBP2                                        |
| FOXJ3                                                  | CYP4B1                                       |
| GPD1L                                                  | DDC                                          |
| HDAC4                                                  | DEAF1                                        |
| HK2                                                    | EFHB                                         |
| INPP5A                                                 | EHD3                                         |
| JARID2                                                 | ERC2                                         |
| LPP                                                    | FBN1                                         |
| MCF2L                                                  | FBXO46                                       |
| MUM1                                                   | GNG7                                         |
| MYBPH                                                  | GPR35                                        |
| NEDD4L                                                 | GSN                                          |
| NEDD9                                                  | H1FO                                         |
| NTRK3                                                  | HPN                                          |
| PPP2R5C                                                | HS6ST1                                       |
| PROSC                                                  | IDNK                                         |
| PRPF38B                                                | IGSF3                                        |
| RBM3                                                   | IL32                                         |
| RBM4                                                   | ITM2C                                        |
| RBM5                                                   | JDP2                                         |
| SEC14L1                                                | KDM4C                                        |

|        |          |
|--------|----------|
| SP2    | LMCD1    |
| SPN    | LRFN2    |
| SPRED2 | MAPK4    |
| TCF12  | MDK      |
| TIMM8A | MPP2     |
| VPS13D | NACC1    |
| ZNF143 | NLGN2    |
|        | NPR3     |
|        | NXN      |
|        | PCYT1B   |
|        | PEX6     |
|        | PIK3R2   |
|        | PMP22    |
|        | PPP1R10  |
|        | PRICKLE2 |
|        | PRKCZ    |
|        | PRRC2A   |
|        | PTAFR    |
|        | RARG     |
|        | RDH5     |
|        | RGS22    |
|        | SARDH    |
|        | SCAND3   |
|        | SDK2     |
|        | SETD7    |
|        | SLC12A8  |
|        | SLC25A20 |
|        | SNTG2    |
|        | SPIRE2   |
|        | TBX3     |
|        | TCF7     |
|        | TMEM145  |
|        | ZAK      |

\*Creighton CJ, Sada YH, Zhang Y, et al. A gene transcription signature of obesity in breast cancer. *Breast Cancer Res Treat.* 2011. (doi: 10.1007/s10549-011-1595-y).

\*Sun X, Casbas-Hernandez P, Bigelow C, et al. Normal breast tissue of obese women is enriched for macrophage markers and macrophage-associated gene expression. *Breast Cancer Res Treat.* 2012;131(3):1003-12. (doi: 10.1007/s10549-011-1789-3).
