# Supplementary material
Source: PubMed Central journal article supplement (PMC4474159)
Supplement: NIHMS688723-supplement-10549_2015_3401_MOESM4_ESM.pdf [file NIHMS688723-supplement-10549_2015_3401_MOESM4_ESM.pdf]

Body Mass Index Associated with Genome-Wide Methylation in Breast Tissue. *Breast Cancer Research and Treatment*. Hair BY, Xu Z, Kirk E, Harlid S, Sandhu R, Robinson WR, Wu MC, Olshan AF, Conway K, Taylor JA, Troester MA. Corresponding author affiliation: University of North Carolina at Chapel Hill. Corresponding author email: bhair@email.unc.edu

Supplemental Table 4. BMI-Associated Methylation Sites Correlated\* with Gene Expression in the Normal Breast Study

| Probe      | CHR | MAPINFO   | Gene     | CPG Location** | Regression Coefficient | Regression p-value | Regression q-value | Correlation Coefficient |
|------------|-----|-----------|----------|----------------|------------------------|--------------------|--------------------|-------------------------|
| cg13674705 | 1   | 184829177 | FAM129A  | Other          | -101.276974            | 8.33E-07           | 0.014051189        | 0.344148312             |
| cg01440934 | 1   | 47051752  | MKNK1    | Other          | -94.2767073            | 1.61E-06           | 0.01753765         | -0.335594144            |
| cg00407944 | 9   | 139424152 | NOTCH1   | N_Shore        | -53.8192238            | 3.38E-06           | 0.01753765         | -0.318637313            |
| cg11967765 | 7   | 2774195   | GNA12    | N_Shore        | -57.0537378            | 3.51E-06           | 0.01753765         | -0.315805216            |
| cg11967765 | 7   | 2774195   | GNA12    | N_Shore        | -57.0537378            | 3.51E-06           | 0.01753765         | -0.304079827            |
| cg03458695 | 10  | 78163703  | C10orf11 | Other          | -87.0132836            | 3.52E-06           | 0.01753765         | -0.42568575             |
| cg13071208 | 8   | 145686887 | CYHR1    | N_Shore        | 44.69189078            | 4.44E-06           | 0.017953013        | -0.313453792            |
| cg08202836 | 3   | 196373751 | NRROS    | Other          | -37.8588563            | 4.57E-06           | 0.017953013        | -0.321379438            |
| cg10499974 | 3   | 46244099  | CCR1     | Other          | -59.4992213            | 4.57E-06           | 0.017953013        | -0.509214704            |
| cg24527008 | 5   | 177870233 | COL23A1  | Other          | -52.5998842            | 4.73E-06           | 0.017953013        | 0.336076261             |
| cg27571769 | 4   | 185704063 | ACSL1    | Other          | -42.3024057            | 5.07E-06           | 0.018431368        | -0.30987341             |
| cg25346117 | 1   | 116923256 | ATP1A1   | Other          | -95.435554             | 5.35E-06           | 0.018431368        | 0.364885922             |
| cg18418051 | 5   | 32734970  | NPR3     | Other          | -57.9046566            | 6.96E-06           | 0.019667893        | -0.347727421            |
| cg18418051 | 5   | 32734970  | NPR3     | Other          | -57.9046566            | 6.96E-06           | 0.019667893        | -0.344993546            |
| cg10145584 | 11  | 117860269 | IL10RA   | S_Shelf        | -75.4771634            | 7.00E-06           | 0.019667893        | -0.3182674              |
| cg17207512 | 6   | 11382553  | NEDD9    | Other          | -54.5438913            | 9.27E-06           | 0.020329339        | -0.342631971            |
| cg16250868 | 7   | 3710628   | SDK1     | Other          | -23.0014561            | 9.88E-06           | 0.020530477        | -0.321875136            |
| cg03886558 | 12  | 57869490  | ARHGAP9  | Island         | 48.72049739            | 0.0000121          | 0.021227324        | 0.412887365             |
| cg00471696 | 2   | 173955214 | ZAK      | Other          | 46.52696998            | 0.0000127          | 0.021227324        | 0.312485925             |
| cg07113653 | 6   | 13428657  | GFOD1    | Other          | -47.9442335            | 0.0000133          | 0.02128061         | -0.357707397            |
| cg11297046 | 19  | 49657000  | HRC      | S_Shore        | -57.8059166            | 0.0000151          | 0.022120253        | -0.363250195            |
| cg20049422 | 15  | 26044289  | ATP10A   | Other          | -41.9534232            | 0.0000154          | 0.02222974         | -0.511643919            |
| cg13549277 | 12  | 6659520   | IFFO1    | S_Shore        | -57.0321044            | 0.0000173          | 0.023421457        | -0.402985469            |
| cg16903174 | 2   | 9468351   | ASAP2    | Other          | -44.572783             | 0.0000177          | 0.023726249        | -0.377155948            |
| cg10058766 | 1   | 12186079  | TNFRSF8  | Other          | -38.620051             | 0.0000178          | 0.023726249        | -0.313556651            |
| cg23854567 | 12  | 120694893 | PXN      | Other          | 43.28749085            | 0.0000179          | 0.023780737        | 0.362143519             |

Supplemental Table 4. BMI-Associated Methylation Sites Correlated\* with Gene Expression in the Normal Breast Study

| Probe      | CHR | MAPINFO   | Gene     | CPG Location** | Regression Coefficient | Regression p-value | Regression q-value | Correlation Coefficient |
|------------|-----|-----------|----------|----------------|------------------------|--------------------|--------------------|-------------------------|
| cg13674705 | 1   | 184829177 | FAM129A  | Other          | -101.276974            | 8.33E-07           | 0.014051189        | 0.344148312             |
| cg15757292 | 11  | 119994008 | TRIM29   | Other          | -61.9120724            | 0.000018           | 0.02384259         | 0.314865953             |
| cg24413778 | 13  | 110977981 | COL4A2   | Other          | -45.8082533            | 0.0000215          | 0.02494369         | -0.347805947            |
| cg02933639 | 4   | 8207325   | SH3TC1   | Other          | -60.3490474            | 0.0000303          | 0.027884148        | -0.397432534            |
| cg06787669 | 7   | 45018789  | MYO1G    | Other          | -49.7575419            | 0.000032           | 0.028284147        | -0.484234196            |
| cg14669515 | 1   | 9386821   | SPSB1    | Other          | 47.05358741            | 0.0000329          | 0.028423821        | 0.526071625             |
| cg14669515 | 1   | 9386821   | SPSB1    | Other          | 47.05358741            | 0.0000329          | 0.028423821        | 0.37237836              |
| cg04217515 | 21  | 46325853  | ITGB2    | S_Shore        | -50.8259327            | 0.0000338          | 0.028646773        | -0.402658542            |
| cg01457077 | 2   | 239228573 | TRAF3IP1 | N_Shore        | 80.9412732             | 0.0000339          | 0.028646773        | 0.316682326             |
| cg06385449 | 11  | 63974123  | FERMT3   | N_Shore        | -64.538606             | 0.0000343          | 0.028686554        | -0.330149066            |
| cg10271819 | 7   | 139426030 | HIPK2    | Other          | -51.7229897            | 0.0000358          | 0.028686554        | -0.337330308            |
| cg06942450 | 20  | 57583520  | CTSZ     | S_Shore        | -78.8698746            | 0.0000383          | 0.029141948        | -0.347182691            |
| cg04516672 | 10  | 126411663 | FAM53B   | Other          | -28.8922973            | 0.0000399          | 0.029317869        | -0.301108942            |
| cg17184477 | 15  | 67360705  | SMAD3    | S_Shore        | 51.26763455            | 0.0000422          | 0.029413144        | 0.309560487             |
| cg13795831 | 20  | 57582706  | CTSZ     | S_Shore        | -45.3974555            | 0.0000429          | 0.029413144        | -0.420406302            |
| cg21271945 | 1   | 2080081   | PRKCZ    | N_Shelf        | -39.4927655            | 0.0000431          | 0.029413144        | 0.432941869             |
| cg00539174 | 20  | 57583434  | CTSZ     | S_Shore        | -66.2131124            | 0.0000486          | 0.029863233        | -0.392719359            |
| cg01721313 | 3   | 169751609 | GPR160   | N_Shelf        | -86.6887198            | 0.0000492          | 0.029863233        | 0.3195447               |
| cg11433866 | 12  | 115126908 | TBX3     | S_Shore        | -67.2161668            | 0.0000494          | 0.029863233        | 0.463476999             |
| cg20306863 | 1   | 3593812   | TP73     | Other          | -63.1574357            | 0.0000501          | 0.029863233        | -0.31711067             |
| cg20682563 | 5   | 133460874 | TCF7     | Other          | 36.85168441            | 0.0000506          | 0.029863233        | -0.412707244            |
| cg18315380 | 7   | 1095666   | GPR146   | N_Shore        | -42.5972866            | 0.0000537          | 0.030379861        | -0.452534009            |
| cg06579738 | 11  | 111165311 | C11orf93 | N_Shelf        | 28.51727134            | 0.0000563          | 0.030715591        | -0.355951033            |
| cg17013990 | 1   | 161091682 | NIT1     | S_Shelf        | -51.6580163            | 0.0000564          | 0.030715591        | 0.35937513              |
| cg10163050 | X   | 153637650 | DNASE1L1 | N_Shelf        | -71.771804             | 0.0000566          | 0.030715591        | -0.303283861            |
| cg02794695 | 8   | 134072611 | SLA      | Other          | -56.4211034            | 0.000058           | 0.03071835         | -0.304140433            |
| cg09676376 | 12  | 54779077  | ZNF385A  | Other          | -68.9131942            | 0.0000596          | 0.030864952        | -0.364534874            |
| cg00520380 | 22  | 31643997  | LIMK2    | Other          | 64.92136629            | 0.0000608          | 0.031167938        | -0.397712157            |
| cg01578632 | 16  | 69958298  | WWP2     | Other          | 27.27033285            | 0.0000614          | 0.03116932         | -0.300824996            |
| cg07103201 | 17  | 20171047  | SPECC1   | Other          | -29.2620128            | 0.0000632          | 0.031251895        | -0.43441431             |
| cg07103201 | 17  | 20171047  | SPECC1   | Other          | -29.2620128            | 0.0000632          | 0.031251895        | 0.372381964             |

Supplemental Table 4. BMI-Associated Methylation Sites Correlated\* with Gene Expression in the Normal Breast Study

| Probe      | CHR | MAPINFO   | Gene     | CPG Location** | Regression Coefficient | Regression p-value | Regression q-value | Correlation Coefficient |
|------------|-----|-----------|----------|----------------|------------------------|--------------------|--------------------|-------------------------|
| cg13674705 | 1   | 184829177 | FAM129A  | Other          | -101.276974            | 8.33E-07           | 0.014051189        | 0.344148312             |
| cg18576206 | 22  | 44392384  | PARVB    | Island         | -44.8674889            | 0.0000655          | 0.031438207        | -0.406940429            |
| cg11589536 | 3   | 46250518  | CCR1     | Other          | -73.5453451            | 0.0000671          | 0.031449516        | -0.508539897            |
| cg03514239 | 1   | 153329781 | S100A9   | Other          | -82.3085371            | 0.0000699          | 0.031600501        | -0.372705885            |
| cg00620452 | 3   | 32147645  | GPD1L    | N_Shore        | 54.03599609            | 0.0000705          | 0.031679513        | -0.306121011            |
| cg02671382 | 1   | 120457856 | NOTCH2   | Other          | 56.32861277            | 0.0000725          | 0.031945154        | 0.315673262             |
| cg23682913 | 1   | 2080710   | PRKCZ    | N_Shore        | -57.1478494            | 0.0000725          | 0.031945154        | 0.544192206             |
| cg13279083 | 4   | 110128090 | COL25A1  | Other          | 42.08120393            | 0.0000739          | 0.032293853        | 0.374526886             |
| cg03342032 | 13  | 94725495  | GPC6     | Other          | 26.89400088            | 0.0000761          | 0.032516439        | 0.353542051             |
| cg03857553 | 22  | 29976613  | NIPSNAP1 | N_Shore        | 25.23257142            | 0.0000762          | 0.032516439        | -0.368926472            |
| cg26938118 | 18  | 56059556  | NEDD4L   | Other          | 53.84284933            | 0.000077           | 0.032516439        | -0.380406978            |
| cg22609908 | 12  | 858759    | WNK1     | N_Shelf        | -27.7460806            | 0.0000812          | 0.032902116        | -0.368977827            |
| cg26371957 | 12  | 739280    | NINJ2    | Other          | -18.0394608            | 0.0000824          | 0.033059549        | -0.328590991            |
| cg18809126 | 3   | 11623526  | VGLL4    | Other          | 36.87658165            | 0.0000844          | 0.033392811        | -0.346109734            |
| cg23013850 | 2   | 225266304 | FAM124B  | Other          | -33.5574251            | 0.0000858          | 0.033542161        | -0.308753012            |
| cg13826666 | 9   | 136600241 | SARDH    | Other          | -52.6148075            | 0.0000863          | 0.033542161        | 0.353481609             |
| cg11300147 | 12  | 7596703   | CD163L1  | S_Shelf        | -25.3911477            | 0.0000921          | 0.034018006        | -0.437121539            |
| cg12080566 | 2   | 75798232  | EVA1A    | Other          | 68.67582074            | 0.0000938          | 0.034274745        | -0.302090897            |
| cg08354401 | 5   | 177824353 | COL23A1  | S_Shore        | 48.88484681            | 0.0000969          | 0.034660739        | -0.348502701            |
| cg26863600 | 19  | 2616921   | GNG7     | S_Shelf        | -25.1013393            | 0.0000972          | 0.034660739        | 0.435841136             |
| cg07431973 | 14  | 52142383  | FRMD6    | Other          | 30.2567186             | 0.0000978          | 0.034759923        | -0.364099383            |
| cg03277819 | 12  | 772529    | NINJ2    | Other          | 25.96065939            | 0.000107866        | 0.035661028        | 0.395542267             |
| cg16129800 | 11  | 2920414   | SLC22A18 | N_Shelf        | -55.7550841            | 0.0001109          | 0.036015728        | 0.346017553             |
| cg20271057 | 3   | 16974160  | PLCL2    | Other          | -56.8921052            | 0.000111493        | 0.0360725          | -0.301263064            |
| cg23787937 | 12  | 29303160  | FAR2     | S_Shore        | -48.9595654            | 0.000112136        | 0.036082857        | -0.473436885            |
| cg08160072 | 2   | 40009501  | THUMPD2  | S_Shelf        | -43.90711              | 0.000112339        | 0.036106863        | 0.408024474             |
| cg17869960 | 6   | 12718530  | PHACTR1  | Other          | 21.89379142            | 0.000114825        | 0.036110687        | 0.41872729              |
| cg07984358 | 10  | 24704829  | KIAA1217 | Other          | 37.20186931            | 0.000116757        | 0.036331314        | -0.321807981            |
| cg10783294 | 12  | 679668    | NINJ2    | S_Shore        | 49.23197696            | 0.000116792        | 0.036331314        | 0.376135202             |
| cg06663317 | 16  | 56641101  | MT2A     | N_Shore        | 47.59135917            | 0.000118872        | 0.036521611        | 0.400773275             |
| cg00353571 | 19  | 49238653  | RASIP1   | Island         | 52.98746852            | 0.000121987        | 0.0368364          | 0.360947364             |

Supplemental Table 4. BMI-Associated Methylation Sites Correlated\* with Gene Expression in the Normal Breast Study

| Probe      | CHR | MAPINFO   | Gene     | CPG Location** | Regression Coefficient | Regression p-value | Regression q-value | Correlation Coefficient |
|------------|-----|-----------|----------|----------------|------------------------|--------------------|--------------------|-------------------------|
| cg13674705 | 1   | 184829177 | FAM129A  | Other          | -101.276974            | 8.33E-07           | 0.014051189        | 0.344148312             |
| cg21870662 | 17  | 2241570   | SGSM2    | S_Shore        | 92.81487158            | 0.000122217        | 0.0368364          | -0.306204981            |
| cg13071185 | 11  | 860134    | TSPAN4   | S_Shore        | 27.3888583             | 0.000123014        | 0.0368364          | 0.402397481             |
| cg13728131 | 11  | 19799633  | NAV2     | S_Shore        | 56.7727934             | 0.000127593        | 0.0368364          | -0.456007137            |
| cg13728131 | 11  | 19799633  | NAV2     | S_Shore        | 56.7727934             | 0.000127593        | 0.0368364          | -0.412670856            |
| cg15674813 | 2   | 238608549 | LRRFIP1  | Other          | -51.6178547            | 0.000127987        | 0.0368364          | -0.360082037            |
| cg21031128 | 8   | 21771278  | DOK2     | S_Shore        | -47.8311475            | 0.000128531        | 0.0368364          | -0.308963706            |
| cg02771464 | 22  | 19108494  | DGCR2    | N_Shore        | 33.01485719            | 0.000130617        | 0.037093957        | -0.345167622            |
| cg14944269 | 14  | 65439602  | RAB15    | S_Shore        | 45.4477371             | 0.000130799        | 0.037093957        | -0.323550176            |
| cg04615460 | 12  | 115125098 | TBX3     | Island         | -36.9950629            | 0.000130925        | 0.037093957        | 0.532759986             |
| cg03690812 | 12  | 111875483 | SH2B3    | Other          | -80.9646839            | 0.000131803        | 0.037093957        | -0.340613464            |
| cg21785723 | 1   | 6551782   | PLEKHG5  | S_Shore        | -62.2850588            | 0.000133743        | 0.037199839        | -0.412077907            |
| cg19771173 | 1   | 204296545 | PLEKHA6  | Other          | -41.537495             | 0.000135638        | 0.037337498        | 0.453304896             |
| cg13695585 | 6   | 30853014  | DDR1     | S_Shore        | 34.11463886            | 0.000135995        | 0.037337498        | -0.506674916            |
| cg20454518 | 12  | 133135463 | FBRSL1   | Island         | -45.0909608            | 0.000137775        | 0.037480601        | 0.315715296             |
| cg06332304 | 10  | 126782397 | CTBP2    | Other          | 33.61985743            | 0.000137973        | 0.037480601        | -0.328613011            |
| cg01458495 | 3   | 48310544  | ZNF589   | Other          | 25.68879712            | 0.000140862        | 0.037642484        | -0.332030208            |
| cg22337438 | 19  | 54327437  | NLRP12   | Other          | -45.8446941            | 0.000142759        | 0.037801273        | -0.600892577            |
| cg09358422 | 1   | 1023247   | C1orf159 | Island         | 26.32197965            | 0.000143905        | 0.037801273        | -0.377406289            |
| cg06959773 | 7   | 76033795  | SRCRB4D  | S_Shelf        | -62.6525356            | 0.000148019        | 0.037801822        | -0.426606464            |
| cg22867608 | 10  | 64573356  | EGR2     | Island         | 27.20529237            | 0.000148031        | 0.037801822        | -0.302760868            |
| cg10129493 | 19  | 51728586  | CD33     | Other          | -66.1939403            | 0.000148549        | 0.037892307        | -0.454814434            |
| cg25752703 | 3   | 128710390 | KIAA1257 | N_Shelf        | -42.904647             | 0.00014936         | 0.037995577        | 0.39104489              |
| cg04483936 | 15  | 57668247  | CGNL1    | N_Shore        | -55.3512029            | 0.000150078        | 0.03804522         | 0.381106858             |
| cg25141611 | 13  | 113422162 | ATP11A   | S_Shore        | -57.5637982            | 0.000151396        | 0.038167284        | -0.358623779            |
| cg00136547 | 6   | 56507796  | DST      | Other          | 22.70377225            | 0.000151729        | 0.038182774        | -0.31488223             |
| cg23497683 | 2   | 100759159 | AFF3     | Other          | -35.3116602            | 0.000154367        | 0.03839667         | 0.336310258             |
| cg24523322 | 1   | 1023281   | C1orf159 | Island         | 24.48992738            | 0.000156178        | 0.03857589         | -0.389513114            |
| cg05584759 | 12  | 57869421  | ARHGAP9  | Island         | 47.12909213            | 0.000157359        | 0.03863862         | 0.352100837             |
| cg13101705 | 1   | 183248593 | NMNAT2   | Other          | -37.2948053            | 0.000161959        | 0.039034245        | -0.32800228             |
| cg04541607 | 22  | 27013978  | CRYBB1   | Other          | -51.7261521            | 0.000165761        | 0.039349767        | -0.315188641            |

Supplemental Table 4. BMI-Associated Methylation Sites Correlated\* with Gene Expression in the Normal Breast Study

| Probe      | CHR | MAPINFO   | Gene    | CPG Location** | Regression Coefficient | Regression p-value | Regression q-value | Correlation Coefficient |
|------------|-----|-----------|---------|----------------|------------------------|--------------------|--------------------|-------------------------|
| cg13674705 | 1   | 184829177 | FAM129A | Other          | -101.276974            | 8.33E-07           | 0.014051189        | 0.344148312             |
| cg02865595 | 1   | 36771714  | SH3D21  | N_Shore        | 23.56649089            | 0.000167116        | 0.039349767        | -0.391840387            |
| cg16438525 | 3   | 52517742  | NISCH   | N_Shelf        | 25.87624162            | 0.000174475        | 0.039728888        | -0.311014759            |
| cg12004641 | 2   | 218750749 | TNS1    | Other          | -45.5716139            | 0.000177045        | 0.039728888        | -0.32490151             |
| cg19015961 | 10  | 90712748  | ACTA2   | Other          | 49.69787477            | 0.000181152        | 0.040065433        | -0.308968822            |
| cg13666041 | 14  | 69442697  | ACTN1   | N_Shore        | 19.67549811            | 0.000181923        | 0.040065433        | -0.30566671             |
| cg15726700 | 3   | 196370254 | NRROS   | S_Shelf        | -47.5221336            | 0.000185678        | 0.040214346        | -0.389652702            |
| cg20149168 | 1   | 68512807  | DIRAS3  | Island         | -68.6520196            | 0.000185867        | 0.040214346        | 0.354889542             |
| cg23715045 | 11  | 124621944 | VSIG2   | Other          | 40.8902228             | 0.000190062        | 0.040401171        | -0.49879915             |
| cg14590912 | 9   | 135905092 | GTF3C5  | N_Shore        | 41.89504678            | 0.000190566        | 0.040411945        | -0.378846204            |
| cg15545878 | 11  | 111782607 | CRYAB   | Other          | 38.34746071            | 0.000195419        | 0.040529458        | 0.345356116             |
| cg02334109 | 15  | 26044050  | ATP10A  | Other          | -44.2909677            | 0.000198236        | 0.040596074        | -0.559265682            |
| cg05143345 | 14  | 23447408  | AJUBA   | N_Shelf        | 33.43803925            | 0.000201082        | 0.040649634        | -0.438962101            |
| cg01844235 | 22  | 23487969  | RAB36   | Island         | 53.00313692            | 0.00020186         | 0.040707018        | -0.48760018             |
| cg03335246 | 4   | 4860431   | MSX1    | N_Shore        | -41.4246815            | 0.000205441        | 0.040923827        | -0.345216013            |
| cg14285050 | 1   | 40778294  | COL9A2  | N_Shelf        | -59.2546573            | 0.000209697        | 0.041366798        | 0.45629124              |
| cg11700584 | 14  | 50088544  | MGAT2   | S_Shore        | 71.46860032            | 0.000211868        | 0.041495656        | 0.326736824             |
| cg12414070 | 12  | 117627133 | FBXO21  | N_Shore        | 45.74758956            | 0.000212644        | 0.041495656        | -0.380604214            |
| cg10413136 | 4   | 8207119   | SH3TC1  | Other          | -45.4466599            | 0.000213143        | 0.041495656        | -0.409968149            |
| cg14413904 | 10  | 62423377  | ANK3    | Other          | -40.58738              | 0.000213282        | 0.041495656        | 0.455511551             |
| cg12532266 | 5   | 132201652 | UQCRQ   | N_Shore        | 26.24170338            | 0.000223944        | 0.041792459        | 0.501260835             |
| cg24553170 | 1   | 49243472  | BEND5   | S_Shore        | 32.26771441            | 0.00022656         | 0.04192076         | -0.366214232            |
| cg08120210 | 15  | 66682733  | MAP2K1  | S_Shelf        | -18.8777589            | 0.000227227        | 0.04192352         | -0.322665801            |
| cg02424715 | 14  | 75893680  | JDP2    | N_Shore        | -46.4620499            | 0.000227526        | 0.04192352         | -0.411776939            |
| cg01226614 | 13  | 44947593  | SERP2   | Island         | 39.37580587            | 0.000231528        | 0.042184712        | -0.36217921             |
| cg01123186 | 17  | 36514710  | SOCS7   | Other          | 29.70050653            | 0.000234658        | 0.042357582        | -0.418065699            |
| cg00728848 | 6   | 13483832  | GFOD1   | N_Shelf        | -34.2444635            | 0.000236635        | 0.042426476        | -0.386585081            |
| cg08651590 | 2   | 65543410  | SPRED2  | S_Shelf        | 26.70280266            | 0.000241108        | 0.042673154        | -0.316094083            |
| cg21188037 | 7   | 45018658  | MYO1G   | Other          | -50.4949968            | 0.000245002        | 0.042992623        | -0.507324595            |
| cg12974599 | 22  | 46770195  | CELSR1  | N_Shore        | -25.7029749            | 0.000246673        | 0.043048176        | 0.386562052             |
| cg14365457 | 9   | 124029877 | GSN     | Other          | -68.4497531            | 0.000246726        | 0.043048176        | -0.323392213            |

Supplemental Table 4. BMI-Associated Methylation Sites Correlated\* with Gene Expression in the Normal Breast Study

| Probe      | CHR | MAPINFO   | Gene      | CPG Location** | Regression Coefficient | Regression p-value | Regression q-value | Correlation Coefficient |
|------------|-----|-----------|-----------|----------------|------------------------|--------------------|--------------------|-------------------------|
| cg13674705 | 1   | 184829177 | FAM129A   | Other          | -101.276974            | 8.33E-07           | 0.014051189        | 0.344148312             |
| cg26083045 | 3   | 8560168   | LMCD1     | Other          | -77.7309928            | 0.000247773        | 0.043048176        | -0.444697397            |
| cg26933869 | 1   | 19218007  | ALDH4A1   | Other          | -59.2558425            | 0.00024995         | 0.043083921        | -0.516520927            |
| cg26933869 | 1   | 19218007  | ALDH4A1   | Other          | -59.2558425            | 0.00024995         | 0.043083921        | -0.459426608            |
| cg09920804 | 8   | 42053994  | PLAT      | Other          | 45.46278887            | 0.000250576        | 0.043083921        | -0.422539134            |
| cg16846069 | 12  | 6462681   | SCNN1A    | Other          | -43.5003455            | 0.000250896        | 0.043083921        | 0.313417647             |
| cg03730946 | 19  | 6475456   | DENND1C   | Island         | 45.65329342            | 0.000257585        | 0.043519747        | 0.37883714              |
| cg20425130 | 3   | 183273245 | KLHL6     | Other          | -26.576149             | 0.000257622        | 0.043519747        | -0.36592199             |
| cg20425130 | 3   | 183273245 | KLHL6     | Other          | -26.576149             | 0.000257622        | 0.043519747        | -0.361648324            |
| cg00387090 | 1   | 201615401 | NAV1      | N_Shore        | -27.0543047            | 0.000261118        | 0.043579434        | -0.397127586            |
| cg03473377 | 10  | 33568029  | NRP1      | Other          | -59.6711245            | 0.000262025        | 0.043604477        | -0.453264625            |
| cg03473377 | 10  | 33568029  | NRP1      | Other          | -59.6711245            | 0.000262025        | 0.043604477        | -0.427517762            |
| cg09447621 | 11  | 134254646 | B3GAT1    | S_Shore        | -37.3016478            | 0.000265009        | 0.043817951        | 0.478038627             |
| cg02059317 | 16  | 89024511  | CBFA2T3   | Other          | -55.759888             | 0.000267026        | 0.043904453        | -0.327447346            |
| cg02845870 | 11  | 85524670  | SYTL2     | S_Shelf        | -72.9289365            | 0.000267867        | 0.043904453        | 0.456527537             |
| cg18498263 | 14  | 91034963  | TTC7B     | Other          | 21.86304525            | 0.000269697        | 0.043904453        | 0.393104161             |
| cg26633373 | 19  | 54377836  | MYADM     | S_Shore        | -34.8225532            | 0.000271335        | 0.043904453        | -0.34154398             |
| cg02807984 | 11  | 722258    | EPS8L2    | S_Shore        | -35.2471368            | 0.000272666        | 0.043969779        | 0.335844553             |
| cg23033749 | 7   | 116610238 | ST7       | Other          | -62.4233266            | 0.000274658        | 0.044138811        | -0.306497594            |
| cg21110337 | 12  | 113671028 | TPCN1     | Other          | -32.053929             | 0.00027529         | 0.044164494        | 0.310634408             |
| cg14685146 | 17  | 42088751  | TMEM101   | N_Shelf        | 22.75253322            | 0.000277225        | 0.044202722        | -0.444144181            |
| cg00580562 | 10  | 21789124  | C10orf114 | Island         | -19.846809             | 0.000278316        | 0.044293414        | -0.312606377            |
| cg07175797 | 16  | 50317656  | ADCY7     | Other          | -50.5983335            | 0.000280312        | 0.044340074        | -0.447325765            |
| cg00255726 | 8   | 21769114  | DOK2      | N_Shore        | -61.7149725            | 0.000280871        | 0.044364972        | -0.350482999            |
| cg08578641 | 9   | 34457440  | FAM219A   | Island         | 30.97381911            | 0.000280963        | 0.044364972        | 0.363311362             |
| cg12484113 | 1   | 27898757  | AHDC1     | N_Shelf        | 44.4891951             | 0.000284043        | 0.044365371        | -0.463177154            |
| cg17244340 | 6   | 36973448  | FGD2      | Other          | -35.1373115            | 0.000287362        | 0.044413839        | -0.404303846            |
| cg13509421 | 12  | 110476821 | ANKRD13A  | Other          | 28.79556146            | 0.000287888        | 0.044413839        | -0.327460896            |
| cg18113826 | 6   | 31583942  | AIF1      | N_Shelf        | -59.3534699            | 0.000288027        | 0.044413839        | -0.392083723            |
| cg04332442 | 22  | 46770063  | CELSR1    | N_Shore        | -24.5412114            | 0.000294517        | 0.044790573        | 0.468566115             |
| cg22908922 | 14  | 105855008 | PACS2     | S_Shelf        | -59.0401959            | 0.000297173        | 0.044797334        | -0.325413806            |

Supplemental Table 4. BMI-Associated Methylation Sites Correlated\* with Gene Expression in the Normal Breast Study

| Probe      | CHR | MAPINFO   | Gene     | CPG Location** | Regression Coefficient | Regression p-value | Regression q-value | Correlation Coefficient |
|------------|-----|-----------|----------|----------------|------------------------|--------------------|--------------------|-------------------------|
| cg13674705 | 1   | 184829177 | FAM129A  | Other          | -101.276974            | 8.33E-07           | 0.014051189        | 0.344148312             |
| cg25623459 | 11  | 1861344   | TNNI2    | Other          | -34.3510194            | 0.000301797        | 0.044797334        | 0.3198241               |
| cg04822621 | 5   | 169724656 | LCP2     | Other          | -23.0850569            | 0.000302276        | 0.044797334        | -0.487521781            |
| cg17297216 | 15  | 99194474  | IGF1R    | Island         | 63.96682134            | 0.000302822        | 0.044797334        | -0.37548385             |
| cg19011001 | 14  | 93539613  | ITPK1    | Other          | -40.9950513            | 0.000303778        | 0.044861768        | -0.428826621            |
| cg24566261 | 6   | 30854164  | DDR1     | S_Shore        | 50.51346402            | 0.000310482        | 0.045232832        | -0.490689865            |
| cg21579294 | 13  | 113997499 | GRTP1    | Other          | -53.6846378            | 0.000312917        | 0.045347389        | 0.355569358             |
| cg05266786 | 10  | 49742271  | ARHGAP22 | Other          | 26.80664352            | 0.000313605        | 0.045404854        | 0.347676947             |
| cg22935317 | 14  | 23447078  | AJUBA    | N_Shelf        | 33.70054854            | 0.000315236        | 0.045473327        | -0.44345081             |
| cg01595717 | 9   | 140586201 | EHMT1    | N_Shore        | -31.8748602            | 0.000321068        | 0.045764723        | 0.395075851             |
| cg01595717 | 9   | 140586201 | EHMT1    | N_Shore        | -31.8748602            | 0.000321068        | 0.045764723        | 0.347164826             |
| cg08343834 | 17  | 15168658  | PMP22    | S_Shelf        | 22.71280141            | 0.00032503         | 0.045991101        | 0.381852344             |
| cg21957813 | 11  | 44638520  | CD82     | Other          | 43.77805284            | 0.000332202        | 0.046066512        | -0.416224612            |
| cg09990481 | 10  | 90712684  | ACTA2    | Other          | 46.02028079            | 0.000336096        | 0.046089905        | -0.338312191            |
| cg17674726 | 2   | 231743193 | ITM2C    | Other          | -57.7073664            | 0.000336874        | 0.046089905        | 0.422665806             |
| cg13578303 | 19  | 49838698  | CD37     | N_Shelf        | -53.4177968            | 0.000346141        | 0.046494819        | -0.305529781            |
| cg02395812 | 14  | 105955879 | C14orf80 | N_Shore        | 43.94719053            | 0.000346267        | 0.046494819        | 0.37569943              |
| cg15155441 | 11  | 57005981  | APLNR    | Other          | -83.2017034            | 0.000348933        | 0.046670987        | -0.345783219            |
| cg12871285 | 17  | 76713379  | CYTH1    | Other          | 25.99114121            | 0.000357634        | 0.046935802        | 0.308699939             |
| cg16277944 | 5   | 169068404 | DOCK2    | S_Shelf        | 27.19535217            | 0.00036366         | 0.047220961        | 0.319624464             |
| cg02434051 | 19  | 54848878  | LILRA4   | Other          | 38.05598988            | 0.000367561        | 0.047313904        | 0.30377886              |
| cg19272266 | 8   | 38125865  | PPAPDC1B | N_Shore        | 32.55549522            | 0.000368499        | 0.047313904        | -0.590225747            |
| cg24947456 | 12  | 57441432  | MYO1A    | Other          | -48.4262511            | 0.000373489        | 0.047469296        | -0.366172642            |
| cg26583078 | 4   | 186877778 | SORBS2   | Other          | 25.77714715            | 0.00037406         | 0.047492184        | -0.330979876            |
| cg04812726 | 5   | 171875049 | SH3PXD2B | Other          | 45.57905142            | 0.000374653        | 0.047524476        | -0.302709456            |
| cg17460386 | 1   | 207095668 | FAIM3    | Other          | -36.0211424            | 0.000376046        | 0.047584461        | -0.447397337            |
| cg17243643 | 12  | 56114269  | RDH5     | S_Shelf        | 22.85456507            | 0.000377505        | 0.04758944         | 0.369228722             |
| cg18069290 | 12  | 58013539  | SLC26A10 | Island         | -38.7349464            | 0.000378611        | 0.047630324        | 0.304079652             |
| cg19256813 | 12  | 117627286 | FBXO21   | N_Shore        | 33.98857689            | 0.000378713        | 0.047630324        | -0.498548526            |
| cg25550753 | 2   | 47205281  | TTC7A    | Other          | -41.9544369            | 0.000382027        | 0.04781135         | -0.359555494            |
| cg14260643 | 7   | 99277394  | CYP3A5   | Other          | 28.67260883            | 0.000392184        | 0.048352538        | 0.401393968             |

Supplemental Table 4. BMI-Associated Methylation Sites Correlated\* with Gene Expression in the Normal Breast Study

| Probe      | CHR | MAPINFO   | Gene     | CPG Location** | Regression Coefficient | Regression p-value | Regression q-value | Correlation Coefficient |
|------------|-----|-----------|----------|----------------|------------------------|--------------------|--------------------|-------------------------|
| cg13674705 | 1   | 184829177 | FAM129A  | Other          | -101.276974            | 8.33E-07           | 0.014051189        | 0.344148312             |
| cg03333377 | 11  | 93277841  | SMCO4    | S_Shore        | -18.992271             | 0.000392554        | 0.048352538        | 0.355220597             |
| cg26536240 | 16  | 89509760  | ANKRD11  | Other          | 26.32058099            | 0.000393198        | 0.048389356        | -0.333613705            |
| cg15049549 | 3   | 48732213  | IP6K2    | Other          | 24.13211405            | 0.000394456        | 0.048437262        | -0.369533072            |
| cg09472600 | 1   | 183537770 | NCF2     | Other          | -15.934396             | 0.00039757         | 0.048586364        | -0.401385973            |
| cg19747945 | 6   | 42946146  | PEX6     | N_Shore        | 30.97356268            | 0.000399011        | 0.048626895        | -0.31947469             |
| cg03779374 | 3   | 114343825 | ZBTB20   | Other          | -32.0131299            | 0.000399342        | 0.048629208        | -0.319000832            |
| cg17311022 | 3   | 119379792 | POPDC2   | Other          | 30.24198373            | 0.00040184         | 0.048684173        | -0.318644251            |
| cg25076039 | 5   | 169128937 | DOCK2    | Other          | 32.47079968            | 0.000409267        | 0.049010636        | 0.342291786             |
| cg07702311 | 11  | 128646953 | FLI1     | Other          | 29.10081038            | 0.000411434        | 0.049010636        | 0.335095053             |
| cg00861207 | 4   | 8098270   | ABLIM2   | N_Shore        | -67.9355783            | 0.000413213        | 0.049010636        | -0.329687739            |
| cg14729344 | 10  | 121129753 | GRK5     | Other          | -31.8234917            | 0.00041733         | 0.049204549        | -0.319868128            |
| cg11077392 | 11  | 19719446  | NAV2     | Other          | 47.67942451            | 0.000417939        | 0.049204549        | -0.455455315            |
| cg11077392 | 11  | 19719446  | NAV2     | Other          | 47.67942451            | 0.000417939        | 0.049204549        | -0.403889524            |
| cg02804819 | 19  | 49238364  | RASIP1   | N_Shore        | 40.24802635            | 0.000418264        | 0.049204549        | 0.356273436             |
| cg14671926 | 6   | 169930772 | WDR27    | Other          | 43.0718287             | 0.000422072        | 0.049312859        | -0.361748066            |
| cg18750833 | 2   | 71358451  | MPHOSPH1 | S_Shore        | 24.87698932            | 0.000422575        | 0.049312859        | -0.369024573            |
| cg16671238 | 13  | 20987145  | CRYL1    | N_Shore        | -61.584221             | 0.000424484        | 0.049312859        | -0.406870748            |
| cg14654385 | 11  | 63973006  | FERMT3   | N_Shore        | -66.9777126            | 0.000424759        | 0.049312859        | -0.300483562            |
| cg03732056 | 8   | 21771059  | DOK2     | S_Shore        | -21.5810307            | 0.000425148        | 0.049312859        | -0.312533604            |
| cg06015525 | 12  | 57872123  | ARHGAP9  | S_Shore        | -51.0618954            | 0.000425587        | 0.049312859        | -0.332450734            |
| cg25064052 | 4   | 166216151 | KLHL2    | Other          | -32.3624436            | 0.000428276        | 0.049388542        | 0.353712167             |
| cg00748218 | 11  | 19372553  | NAV2     | Other          | 43.33571902            | 0.000431943        | 0.049388542        | -0.441738426            |
| cg00748218 | 11  | 19372553  | NAV2     | Other          | 43.33571902            | 0.000431943        | 0.049388542        | -0.406439334            |
| cg11953913 | 5   | 139562873 | CYSTM1   | Other          | -42.8271889            | 0.000433007        | 0.049388542        | -0.403685101            |
| cg14647287 | 4   | 6927183   | TBC1D14  | S_Shore        | -56.3108666            | 0.000433656        | 0.049388542        | 0.304101461             |
| cg12193327 | 2   | 31454631  | EHD3     | N_Shelf        | -37.2843386            | 0.00043541         | 0.049396091        | 0.340952071             |
| cg26959945 | 7   | 20233217  | MACC1    | Other          | -17.8885435            | 0.000437529        | 0.049396091        | 0.325614657             |
| cg07187855 | 6   | 30854161  | DDR1     | S_Shore        | 43.86416343            | 0.000438847        | 0.049396091        | -0.440350371            |
| cg04388657 | 9   | 127623377 | RPL35    | N_Shore        | 24.01906625            | 0.000452059        | 0.049788704        | -0.443657926            |
| cg17753974 | 1   | 201622519 | NAV1     | S_Shelf        | -35.2481808            | 0.000453778        | 0.049788704        | -0.347566735            |

Supplemental Table 4. BMI-Associated Methylation Sites Correlated\* with Gene Expression in the Normal Breast Study

| Probe      | CHR | MAPINFO   | Gene    | CPG Location** | Regression Coefficient | Regression p-value | Regression q-value | Correlation Coefficient |
|------------|-----|-----------|---------|----------------|------------------------|--------------------|--------------------|-------------------------|
| cg13674705 | 1   | 184829177 | FAM129A | Other          | -101.276974            | 8.33E-07           | 0.014051189        | 0.344148312             |
| cg08133755 | 11  | 19792080  | NAV2    | Other          | 31.33865693            | 0.000457378        | 0.049877914        | -0.451077657            |
| cg08133755 | 11  | 19792080  | NAV2    | Other          | 31.33865693            | 0.000457378        | 0.049877914        | -0.451077657            |

\*A correlation coefficient of  $\leq -0.30$  or  $\geq 0.30$  was the cut-off for determining which CpG sites were correlated with gene expression

\*\*N\_Shore = North shore; N\_Shelf = North shelf; S\_Shore = South shore; S\_Shelf = South shelf; Other = Not in or near a CpG Island

Note: the 226 unique CpG methylation sites linked to 238 gene expression probes
